# Supplementary material
Source: ML conference proceedings conference paper supplement (https://openreview.net/forum?id=iTq_48y8Rj)
Supplement: supplementary_material [file attachment]

# L<sup>A</sup>T<sub>E</sub>X Class for the *Association for Computing Machinery*\*

Boris Veytsman<sup>†</sup>

2022/10/24, v1.88

## Abstract

This package provides a class for typesetting publications of the Association for Computing Machinery.

## Contents

|          |                                                     |          |
|----------|-----------------------------------------------------|----------|
| <b>1</b> | <b>Introduction</b>                                 | <b>3</b> |
| <b>2</b> | <b>User's guide</b>                                 | <b>3</b> |
| 2.1      | Installation                                        | 3        |
| 2.2      | Invocation and options                              | 6        |
| 2.3      | Top matter                                          | 7        |
| 2.4      | Top matter of ACM Engage materials                  | 19       |
| 2.5      | ACM cover page                                      | 19       |
| 2.6      | Internationalization                                | 20       |
| 2.7      | Algorithms                                          | 21       |
| 2.8      | Figures and tables                                  | 21       |
| 2.9      | Descriptions of images                              | 23       |
| 2.10     | Theorems                                            | 23       |
| 2.11     | Online-only and offline-only material               | 23       |
| 2.12     | Note about anonymous mode                           | 24       |
| 2.13     | Acknowledgments                                     | 24       |
| 2.14     | Bibliography                                        | 25       |
| 2.14.1   | Processing using BibT <sub>E</sub> X                | 25       |
| 2.14.2   | Processing using BibL <sup>A</sup> T <sub>E</sub> X | 28       |
| 2.15     | Colors                                              | 29       |
| 2.16     | Other notable packages and typographic remarks      | 29       |
| 2.17     | Counting words                                      | 30       |
| 2.18     | Creative Commons licenses for ACM publications      | 30       |
| 2.19     | Disabled or forbidden commands                      | 31       |
| 2.20     | Notes for wizards                                   | 31       |
| 2.21     | Currently supported publications                    | 32       |
| 2.22     | A note about sigchi-a format                        | 33       |

---

\*©2016–2022, Association for Computing Machinery

<sup>†</sup>[borisv@lk.net](mailto:borisv@lk.net), [boris@varphi.com](mailto:boris@varphi.com)

|          |                                    |           |
|----------|------------------------------------|-----------|
| <b>3</b> | <b>Implementation</b>              | <b>35</b> |
| 3.1      | Identification                     | 35        |
| 3.2      | Preload hook                       | 35        |
| 3.3      | Options                            | 35        |
| 3.4      | Setting switches                   | 39        |
| 3.5      | Loading the base class and package | 40        |
| 3.6      | Citations                          | 41        |
| 3.7      | Internationalization               | 43        |
| 3.8      | Sectioning                         | 45        |
| 3.9      | Hyperxmp and hyperref              | 48        |
| 3.10     | Other packages                     | 50        |
| 3.11     | Paper size and paragraphing        | 50        |
| 3.12     | Fonts                              | 53        |
| 3.13     | Image descriptions                 | 55        |
| 3.14     | Floats                             | 56        |
| 3.15     | Lists                              | 58        |
| 3.16     | Top-matter data                    | 59        |
| 3.17     | Concepts system                    | 75        |
| 3.18     | Copyright system                   | 76        |
| 3.19     | Maketitle hook                     | 82        |
| 3.20     | ACM Engage top matter              | 82        |
| 3.21     | Typesetting top matter             | 82        |
| 3.22     | Headers and Footers                | 99        |
| 3.23     | Sectioning                         | 106       |
| 3.24     | TOC lists                          | 108       |
| 3.25     | Theorems                           | 108       |
| 3.26     | Balancing columns                  | 111       |
| 3.27     | Acknowledgments                    | 113       |
| 3.28     | Conditional typesetting            | 113       |
| 3.29     | Additional bibliography commands   | 113       |
| 3.30     | Index                              | 114       |
| 3.31     | End of Class                       | 114       |

## 1 Introduction

The Association for Computing Machinery<sup>1</sup> is the world’s largest educational and scientific computing society, which delivers resources that advance computing as a science and a profession. It was one of the early adopters of  $\text{\TeX}$  for its typesetting.

It provided several different classes for a number of journals and conference proceedings. Unfortunately during the years since these classes were written, the code was patched many times, and supporting different versions of the classes became difficult.

This package provides the uniform interface for all ACM publications. It is intended to replace all the different classes and packages and provide an up-to-date  $\text{\LaTeX}$  package.

This package uses only free  $\text{\TeX}$  packages and fonts included in  $\text{\TeX}$ Live, Mik $\text{\TeX}$  and other popular  $\text{\TeX}$  distributions. It is intended to be published in these distributions itself, which minimizes users’ efforts in the installation and support of this package.

I am grateful to Michael D. Adams, Leif Andersen, Lawrence Christopher Angrave, Dirk Beyer, Andrew Black, Joachim Breitner, Yegor Bugayenko, Benjamin Byholm, John Collins, Roberto Di Cosmo, Nils Anders Danielsson, Michael Ekstrand, Matthew Fluet, Paolo G. Giarrusso, Ben Greenman, Enrico Gregorio, Jamie Davis, Ulrike Fischer, Jason Hemann, Peter Kemp, Luis Leiva, Ben Liblit, Rholais Lii, LianTze Lim, Kuldeep S. Meel, Kai Mindermann, Frank Mittelbach, Serguei Mokhov, Ross Moore, John Owens, Joel Nider, Scott Pakin, Tobias Pape, Henning Pohl, Philip Quinn, Mathias Rav, Andreas Reichinger, Matteo Riondato, Craig Rodkin, Bernard Rous, Feras Saad, Kerry A. Seitz, Jr., David Shamma, Gabriel Scherer, Kartik Singhal, Christoph Sommer, Stephen Spencer, Shin Hwei Tan, Daniel Thomas, Shari Trewin, Zack Weinberg, John Wickerson and many others for their invaluable help.

The development version of the package is available at <https://github.com/borisveytsman/acmart>.

## 2 User’s guide

This class uses many commands and customizatón options, so it might appear intimidating for a casual user. Do not panic! Many of these commands and options can be safely left with their default values or the values recommended by your conference or journal editors. If you have problems or questions, do not hesitate to ask me directly or the community at <https://github.com/borisveytsman/acmart>, <https://tex.stackexchange.com> or the closest  $\text{\TeX}$  Users Group. The world-wide  $\text{\TeX}$  Users Group is at <https://tug.org/>; please consider joining us if you use  $\text{\TeX}$  regularly.

### 2.1 Installation

Most probably, you already have this package installed in your favorite  $\text{\TeX}$  distribution; if not, you may want to upgrade. You may need to upgrade it anyway since this package uses a number of relatively recent packages, especially the ones related to fonts.

The latest released version of this package can be found on CTAN: <https://www.ctan.org/pkg/acmart>. The development version can be found on GitHub: <https://github.com/borisveytsman/acmart>. At this address you can file a bug report—or even contribute your own enhancement by making a pull request.

---

<sup>1</sup><http://www.acm.org/>

Please note that the version on Github is a development (or experimental) version: please download it for testing new features. The production version is the one on CTAN and ACM sites.

Most users should not attempt to install this package themselves but should rather rely on their  $\text{\TeX}$  distributions to provide it. If you decide to install the package yourself, follow the standard rules:

1. Run `latex acmart.ins`. This will produce the file `acmart.cls`
2. Put the files `acmart.cls` and `ACM-Reference-Format.bst` in places where  $\text{\TeX}$  can find them (see [1] or the documentation for your  $\text{\TeX}$  system).
3. Update the database of file names. Again, see [1] or the documentation for your  $\text{\TeX}$  system for the system-specific details.
4. The file `acmart.pdf` provides the documentation for the package. (This is probably the file you are reading now.)

As an alternative to items 2 and 3 you can just put the files in the working directory where your `.tex` file is.

This class uses a number of other packages. They are included in all major  $\text{\TeX}$  distributions ( $\text{\TeX}$ Live, Mac $\text{\TeX}$ , Mik $\text{\TeX}$ ) of 2015 and later, so you probably have them installed. Just in case here is the list of these packages:

- *amscs*, <http://www.ctan.org/pkg/amscs>
- *amsfonts*, <http://www.ctan.org/pkg/amsfonts>
- *amsmath*, <http://www.ctan.org/pkg/amsmath>
- *binhex*, <http://www.ctan.org/pkg/binhex>
- *balance*, <http://www.ctan.org/pkg/balance>
- *booktabs*, <http://www.ctan.org/pkg/booktabs>
- *caption*, <http://www.ctan.org/pkg/caption>
- *comment*, <http://www.ctan.org/pkg/comment>
- *cm-super*, <http://www.ctan.org/pkg/cm-super>
- *cmap*, <http://www.ctan.org/pkg/cmap>
- *doclicense*, <http://www.ctan.org/pkg/doclicense>
- *draftwatermark*, <http://www.ctan.org/pkg/draftwatermark>
- *environ*, <http://www.ctan.org/pkg/environ>
- *etoolbox*, <http://www.ctan.org/pkg/etoolbox>
- *fancyhdr*, <http://www.ctan.org/pkg/fancyhdr>
- *float*, <http://www.ctan.org/pkg/float>
- *fontaxes*, <http://www.ctan.org/pkg/fontaxes>

- *geometry*, <http://www.ctan.org/pkg/geometry>
- *graphics*, <http://www.ctan.org/pkg/graphics>
- *hyperref*, <http://www.ctan.org/pkg/hyperref>
- *hyperxmp*, <http://www.ctan.org/pkg/hyperxmp>
- *iftex*, <http://www.ctan.org/pkg/iftex>
- *inconsolata*, <http://www.ctan.org/pkg/inconsolata>
- *libertine*, <http://www.ctan.org/pkg/libertine>
- *manyfoot*, <http://www.ctan.org/pkg/manyfoot>
- *microtype*, <http://www.ctan.org/pkg/microtype>
- *mmap*, <http://www.ctan.org/pkg/mmap>
- *ms*, <http://www.ctan.org/pkg/ms>
- *mweights*, <http://www.ctan.org/pkg/mweights>
- *natbib*, <http://www.ctan.org/pkg/natbib>
- *nccfoots*, <http://www.ctan.org/pkg/nccfoots>
- *newtx*, <http://www.ctan.org/pkg/newtx>
- *oberdiek*, <http://www.ctan.org/pkg/oberdiek>
- *pdftex-def*, <http://www.ctan.org/pkg/pdftex-def>
- *refcount*, <http://www.ctan.org/pkg/refcount>
- *setspace*, <http://www.ctan.org/pkg/setspace>
- *textcase*, <http://www.ctan.org/pkg/textcase>
- *totpages*, <http://www.ctan.org/pkg/totpages>
- *trimspaces*, <http://www.ctan.org/pkg/trimspaces>
- *upquote*, <http://www.ctan.org/pkg/upquote>
- *url*, <http://www.ctan.org/pkg/url>
- *xcolor*, <http://www.ctan.org/pkg/xcolor>
- *xkeyval*, <http://www.ctan.org/pkg/xkeyval>
- *xstring*, <http://www.ctan.org/pkg/xstring>

## 2.2 Invocation and options

To use this class, put in the preamble of your document

```
\documentclass[<options>]{acmart}
```

There are several options corresponding to the type of the document and its general appearance. They are described below. Generally speaking, the options have key=value forms, for example,

```
\documentclass[format=acmsmall, screen=true, review=false]{acmart}
```

The option `format` describes the format of the output. There are several possible values for this option, for example,

```
\documentclass[format=acmtog]{acmart}
```

Actually the words `format=` can be omitted, e.g.,

```
\documentclass[acmtog, review=false]{acmart}
```

The possible formats are listed in Table 1. Note that formats starting with `acm` are intended for journals, transactions, and course materials, while formats starting with `sig` are intended for proceedings published as books.

Note that sometimes conference proceedings are published as a special issue (or issues) of an ACM journal. In this case, you should use the journal format for a conference paper. Please contact your conference committee if in doubt.

Starting in 2020, ACM retired formats `sigchi` and `sigchi-a`. SIGCHI conferences now use `sigconf` format for their publications. If a file uses `sigchi` format, a warning is issued, and the format is automatically switched to `sigconf`. Format `sigchi-a` can be used for non-ACM documents only (see Section 2.22). The format `acmcp` is used for ACM cover pages discussed in Section 2.5.

There are several Boolean options that can take `true` or `false` values. They are listed in Table 2. The words `=true` can be omitted when setting a Boolean option, so instead of `screen=true` one can write just `screen`, for example,

```
\documentclass[acmsmall, screen, review]{acmart}
```

The option `review` is useful when combined with the `manuscript` format option. It provides a version suitable for reviewers and copy editors.

Two samples in the `samples` directory, `manuscript` and `acmsmall-submission`, show manuscripts formatted for submission to ACM.

The default for the option `screen` depends on the publication. At present it is `false` for all publications *but* PACM, since PACM is now electronic-only. Thus PACM titles (see Table 5) set this option to `true`. In the future this option may involve additional features suitable for on-screen versions of articles.

The option `natbib` is used when the corresponding BibTeX style is based on `natbib`. In most cases you do not need to set it. See Section 2.14.

The option `anonymous` is used for anonymous review processes and causes all author information to be obscured.

Table 1: The possible values for the format option

| Value      | Meaning                                                                                                                                                                                                                                                                                                                                                                                                                                                                                                    |
|------------|------------------------------------------------------------------------------------------------------------------------------------------------------------------------------------------------------------------------------------------------------------------------------------------------------------------------------------------------------------------------------------------------------------------------------------------------------------------------------------------------------------|
| manuscript | A manuscript. This is the default.                                                                                                                                                                                                                                                                                                                                                                                                                                                                         |
| acmsmall   | Small single-column format. Used for ACMJCSS, CIE, CSUR, DLT, FAC, GAMES, JACM, JATS, JDIQ, JDS, JEA, JERIC, JETC, JRC, PACM-CGIT, PACMHCI, PACMNET, PACMPL, TAAS, TACCESS, TACO, TALG, TALLIP (formerly TALIP), TCPS, TDS, TEAC, TECS, TELO, THRI, TIIIS, TIOT, TISSEC, TIST, TKDD, TMIS, TOCE, TOCHI, TOCL, TOCS, TOCT, TODAES, TODS, TOIS, TOIT, TOMACS, TOMM (formerly TOMCCAP), TOMPECS, TOMS, TOPC, TOPLAS, TOPS, TORS, TOSEM, TOSN, TQC, TRETS, TSAS, TSC, TSLP and TWEB, including special issues. |
| acmlarge   | Large single-column format. Used for DTRAP, HEALTH, IMWUT, JOCCH, POMACS and TAP, including special issues.                                                                                                                                                                                                                                                                                                                                                                                                |
| acmtog     | Large double-column format. Used for TOG, including annual conference Technical Papers.                                                                                                                                                                                                                                                                                                                                                                                                                    |
| sigconf    | Proceedings format for most ACM conferences (with the exception of SIGPLAN) and all ICPS volumes.                                                                                                                                                                                                                                                                                                                                                                                                          |
| sigplan    | Proceedings format for SIGPLAN conferences.                                                                                                                                                                                                                                                                                                                                                                                                                                                                |
| acmengage  | ACM EngageCSEdu Course materials.                                                                                                                                                                                                                                                                                                                                                                                                                                                                          |
| acmcp      | ACM cover page.                                                                                                                                                                                                                                                                                                                                                                                                                                                                                            |

The option `timestamp` is used to include a time stamp in the footer of each page. When preparing a document, this can help avoid confusing different revisions. The footer also includes the page range of the document. This helps detect missing pages in hard copies.

The option `authordraft` is intended for author’s drafts that are not intended for distribution. It typesets a copyright block to give the author an idea of its size and the overall size of the paper but overprints it with the phrase “Unpublished working draft. Not for distribution.”, which is also used as a watermark. This option sets `timestamp` and `review` to true, but these can be overridden by setting these options to false *after* setting `authordraft` to true.

The option `balance` determines whether the last page in the two column mode has balanced columns. By default it is true; however, it may lead to problems for some documents. Set it to false if you encounter compilation errors. Note that for one page documents `\balance` command might cause problems. An alternative is the (experimental) option `pbalance`, which uses the new package `pbalance` for this end.

The option `urlbreakonhyphens` determines whether URLs can be split between lines after hyphens. By default it is true. Set it to false to disallow these breaks.

The option `language` is used to define the languages for the multi-language papers. It is discussed in Section 2.6.

## 2.3 Top matter

A number of commands set up *top matter* or (in computer science jargon) *metadata* for an article. They establish the publication name, article title, authors, DOI and other data. Some of these commands, like `\title` and `\author`, should be put by the authors.

Table 2: Boolean options

| Option            | Default  | Meaning                                                                                                                                                                                     |
|-------------------|----------|---------------------------------------------------------------------------------------------------------------------------------------------------------------------------------------------|
| review            | false    | A review version: lines are numbered and hyperlinks are colored                                                                                                                             |
| screen            | see text | A screen version: hyperlinks are colored                                                                                                                                                    |
| natbib            | true     | Whether to use the natbib package (see Section 2.14)                                                                                                                                        |
| anonymous         | false    | Whether to make author(s) anonymous                                                                                                                                                         |
| authorversion     | false    | Whether to generate a special version for the authors' personal use or posting (see Section 2.3)                                                                                            |
| nonacm            | false    | Use the class typesetting options for a non-ACM document, which will not include the conference/journal header and footers. Currently such documents allow only a Creative Commons license. |
| timestamp         | false    | Whether to put a time stamp in the footer of each page                                                                                                                                      |
| authordraft       | false    | Whether author's-draft mode is enabled                                                                                                                                                      |
| acmthm            | true     | Whether to define theorem-like environments, see Section 2.10                                                                                                                               |
| balance           | true     | Whether to balance the last page in two column mode                                                                                                                                         |
| pbalance          | false    | Whether to balance the last page in two column mode using pbalance package                                                                                                                  |
| urlbreakonhyphens | true     | Whether to break urls on hyphens                                                                                                                                                            |

Others, like `\acmVolume` and `\acmDOI`—by the editors. Below we describe these commands and mention who should issue them. These macros should be used *before* the `\maketitle` command. Note that in previous versions of ACM classes some of these commands should be used before `\maketitle`, and some after it. Now they all must be used before `\maketitle`.

This class internally loads the `amsart` class, so many top-matter commands are inherited from `amsart` [2].

`\acmJournal` The macro `\acmJournal{<shortName>}` sets the name of the journal or transaction for journals and transactions. The argument is the short name of the publication *in uppercase*, for example,

```
\acmJournal{TOMS}
```

The currently recognized journals are listed in Table 5. Note that conference proceedings published in *book* form do not set this macro.

`\acmConference` The macro `\acmConference[<short name>]{<name>}{<date>}{<venue>}` is used for conference proceedings published in the book form. The arguments are the following:

**short name:** the abbreviated name of the conference (optional).

**name:** the name of the conference.

**date:** the date(s) of the conference.

**venue:** the place of the conference.

Examples:

```
\acmConference[TD'15]{Technical Data Conference}{November
12--16}{Dallas, TX, USA}
\acmConference{SA'15 Art Papers}{November 02--06, 2015}{Kobe, Japan}
```

`\acmBooktitle` By default we assume that conference proceedings are published in the book named *Proceedings of CONFERENCE*, where *CONFERENCE* is the name of the conference inferred from the command `\acmConference` above. However, sometimes the book title is different. The command `\acmBooktitle` can be used to set this title, for example,

```
\acmBooktitle{Companion to the first International Conference on the
Art, Science and Engineering of Programming (Programming '17)}
```

An ACM paper should have either `\acmJournal` or `\acmConference` command. If it has both (or more) commands, the last one takes precedence. Note that if you have the command `\acmConference` in a journal format like `acmsmall`, the class will use conference format for bibstrip and reference citation formatting. In the samples directory there is a file `sample-acmsmall-conf.tex` with the example of this usage.

An ACM Engage material should *not* use `\acmJournal` or `\acmConference` command. It may use `\acmBooktitle` to override the default *ACM EngageCSEdu*. It should use `\acmYear` to set the date of the material.

`\editor` In most cases, conference proceedings are edited. You can use the command `\editor{<editor>}` to set the editor of the volume. This command can be repeated, for example,

```

\editor{Jennifer B. Sartor}
\editor{Theo D'Hondt}
\editor{Wolfgang De Meuter}

```

`\title` The command `\title`, as in the `amsart` class, has two arguments: one optional, and one mandatory:

```
\title[ $\langle ShortTitle \rangle$ ]{ $\langle FullTitle \rangle$ }
```

The mandatory argument is the full title of the article. The optional argument, if present, defines the shorter version of the title for running heads. If the optional argument is absent, the full title is used instead.

It is expected that this command is inserted by the author of the manuscript.

`\subtitle` Besides title, ACM classes allow a subtitle, set with the `\subtitle{ $\langle subtitle \rangle$ }` macro.

The commands for specifying authors are highly structured. The reason is they serve double duty: the authors' information is typeset in the manuscript *and* is used by the metadata extraction tools for indexing and cataloguing. Therefore it is very important to follow the guidelines exactly.

`\author` The basic commands are `\author`, `\orcid` (for the researchers registered with ORCID, <http://www.orcid.org/>), `\affiliation` and `\email`. In the simplest case, you enter them in this order:

```

\email
\author{...}
\orcid{...}
\affiliation{...}
\email{...}

```

Do *not* use the  $\LaTeX$  `\and` macro or commas, or `\\` between the authors! Each author deserves his or her own `\author` command. An attempt to list several authors or their e-mails in one command leads to a warning or an error. This is not a bug, but the expected behavior.

Note that some formats do not typeset e-mails or ORCID identifiers. Do not worry: the metadata tools will get them.

ACM strongly encourages that you include ORCIDs for all authors before compiling or submitting for review and/or production processing.

If you do not have an ORCID, you may get one for free by registering at <http://www.orcid.org/>.

Sometimes an author has several affiliations. In this case, the `\affiliation` command should be repeated:

```

\author{...}
\orcid{...}
\affiliation{...}
\affiliation{...}
\email{...}

```

Similarly you can repeat the `\email` command.

You may have several authors with the same affiliation, different affiliations, or overlapping affiliations (author  $A_1$  is affiliated with institutions  $I_1$  and  $I_2$ , while author  $A_2$  is affiliated with  $I_2$  only, author  $A_3$  is affiliated with  $I_1$  and  $I_3$ , etc.). The recommended

solution is to put the `\affiliation` commands after each author, possibly repeating them:

```
\author{...}
\orcid{...}
\affiliation{...}
\affiliation{...}
\email{...}
\author{...}
\orcid{...}
\affiliation{...}
\email{...}
\author{...}
\orcid{...}
\affiliation{...}
\affiliation{...}
\email{...}
```

In some cases, when several authors share the same affiliation, you can try to save space using the format

```
\author{...}
\email{...}
\author{...}
\email{...}
\affiliation{...}
```

However, this format is not generally recommended.

`\additionalaffiliation` In some cases, too many affiliations can take too much space. The command `\additionalaffiliation{<affiliation>}` creates a footnote after an author’s name with the words “Also with {<affiliation>}”. You should use this command only as a last resort. An example of usage is:

```
\author{G. Tobin}
\author{Ben Trovato}
\additionalaffiliation{%
  \institution{The Th{\o}rv{\a}ld Group}
  \streetaddress{1 Th{\o}rv{\a}ld Circle}
  \city{Hekla}
  \country{Iceland}}
\affiliation{%
  \institution{Institute for Clarity in Documentation}
  \streetaddress{P.O. Box 1212}
  \city{Dublin}
  \state{Ohio}
  \postcode{43017-6221}}
```

Here Trovato and Tobin share their affiliation with the Institute for Clarity in Documentation, but only Ben Trovato is affiliated with The Thørvæld Group.

The `\affiliation` and `\additionalaffiliation` commands are further structured to interact with the metadata extraction tools. Inside these commands you should use the `\position`, `\institution`, `\department`, `\city`, `\streetaddress`, `\state`, `\postcode`, `\country`

and `\country` macros to indicate the corresponding parts of the affiliation. Note that in some cases (for example, journals) these parts are not printed in the resulting copy, but they *are* necessary since they are used by the XML metadata extraction programs. Do *not* put commas or `\\` between the elements of `\affiliation`. They will be provided automatically.

The fields `\institution`, `\city` and `\country` are mandatory. If they are not provided, an error or a warning is issued. Currently the absence of `\country` produces an error; ACM may change this in the future.

An example of the author block:

```
\author{A. U. Thor}
\orcid{1234-4564-1234-4565}
\affiliation{%
  \institution{University of New South Wales}
  \department{School of Biomedical Engineering}
  \streetaddress{Samuels Building (F25), Kensington Campus}
  \city{Sidney}
  \state{NSW}
  \postcode{2052}
  \country{Australia}}
\email{author@nsw.au.edu}
\author{A. N. Other}
\affiliation{%
  \institution{University of New South Wales}
  \city{Sidney}
  \state{NSW}
  \country{Australia}}
\author{C. O. Respondent}
\orcid{1234-4565-4564-1234}
\affiliation{%
  \institution{University of Pennsylvania}
  \city{Philadelphia}
  \state{PA}
  \country{USA}}
\affiliation{%
  \institution{University of New South Wales}
  \city{Sidney}
  \state{NSW}
  \country{Australia}}
```

Note that the old ACM conference formats did not allow more than six authors and required some effort from authors to achieve alignment. The new format is much better in this.

Sometimes an author works in several departments within the same insitution. There could be two situations: the departments are independent, or one department is within another. In the first case, just repeat the command `\department` several times. To handle the second case the command has an optional numerical parameter. The departments with higher numbers are higher in the organizational chart. Compare

```
\affiliation{%
  \department[0]{Department of Lunar Studies} % 0 is the default
  \department[1]{John Doe Institute} % higher than 0
  \institution{University of San Serriffe}}
```

```
\country{San Serriffe}}
```

and

```
\affiliation{%  
  \department{Department of Lunar Studies} % Not in the John Doe Institute!  
  \department{John Doe Institute}  
  \institution{University of San Serriffe}  
  \country{San Serriffe}}
```

The command `\affiliation` formats its output according to American conventions. This might be wrong for some cases. Consider, for example, a German address. In Germany, the postcode is put before the city and is not separated by a comma. We can handle this order using

```
\affiliation{%  
  \institution{Fluginstitut}  
  \streetaddress{Sonnenallee 17}  
  \postcode{123456}  
  \city{Helm}  
  \country{Germany}}
```

However, the comma after the postcode is unfortunate: the address will be typeset (in some formats) as

```
Fluginstitut  
Sonnenallee 17  
123456, Helm, Germany
```

To overcome this problem, the command `\affiliation` has an optional parameter `obeypunctuation`, which can be `false` (the default) or `true`. If this parameter is `true`, `\affiliation` obeys the author's command. Thus

```
\affiliation[obeypunctuation=true]{%  
  \institution{Fluginstitut}\\  
  \streetaddress{Sonnenallee 17}\\  
  \postcode{123456}  
  \city{Helm},  
  \country{Germany}}
```

will be typeset as

```
Fluginstitut  
Sonnenallee 17  
123456 Helm, Germany
```

Note that you should *not* use this option for journals.

It is expected that these commands are inserted by the author of the manuscript.

`\thanks` Like `amsart` (and unlike standard  $\text{\LaTeX}$ ), we allow `\thanks` only *outside* of the commands `\title` and `\author`. This command is obsolete and should *not* be used in most

cases. Do not list your acknowledgments or grant sponsors here. Put this information in the acks environment (see Section 2.13).

`\authorsaddresses` In some formats, addresses are printed as a footnote on the first page. By default  $\TeX$  typesets them itself using the information you give it. However, you can override its choice using the command `\authorsaddresses{<contact addresses>}`, for example,

```
\authorsaddresses{%
  Authors' addresses: G.~Zhou, Computer Science Department, College of
  William and Mary, 104 Jameson Rd, Williamsburg, PA 23185, US;
  V.~B'eranger, Inria Paris-Rocquencourt, Rocquencourt, France;
  A.~Patel, Rajiv Gandhi University, Rono-Hills, Doimukh, Arunachal
  Pradesh, India; H.~Chan, Tsinghua University, 30 Shuangqing Rd,
  Haidian Qu, Beijing Shi, China; T.~Yan, Eaton Innovation Center,
  Prague, Czech Republic; T.~He, C.~Huang, J.~A.~Stankovic University
  of Virginia, School of Engineering Charlottesville, VA 22903, USA;
  T. F. Abdelzaher, (Current address) NASA Ames Research Center,
  Moffett Field, California 94035.}
```

You can *suppress* printing authors' addresses by setting them to an empty string: `\authorsaddresses{}`. Please note that authors' addresses are mandatory for journal articles.

`\titlenote` While the command `\thanks` generates a note without a footnote mark, sometimes  
`\subtitlenote` the authors might need notes more tightly connected to the title, subtitle or author. The  
`\authornote` commands `\titlenote`, `\subtitlenote` and `\authornote` that follow the correspond-  
ing commands (`\title`, `\subtitle` and `\author`) generate such notes. For example,

```
\title{This is a title}
\titlenote{This is a titlenote}
\author{A. U. Thor}
\authornote{This is an authornote}
```

Please never use a `\footnote` inside an `\author` or `\title` command since this confuses the metadata extraction software. (Actually these commands now produce errors.)

`\authornotemark` Sometimes one may need to have the same footnote connected to several authors. The command `\authornotemark[<number>]` adds just the footnote mark, for example,

```
\author{A. U. Thor}
\authornote{Both authors contributed equally to the paper}
...
\author{A. N. Other}
\authornotemark[1]
```

The correct numbering of these marks is the responsibility of the user.

`\acmVolume` The macros `\acmVolume`, `\acmNumber`, `\acmArticle`, `\acmYear` and `\acmMonth` are  
`\acmNumber` inserted by the editor and set the journal volume, issue, article number, year and month  
`\acmArticle` correspondingly. The arguments of all these commands, including `\acmMonth`, is numer-  
`\acmYear` ical. For example,

```
\acmMonth
\acmVolume{9}
\acmNumber{4}
\acmArticle{39}
\acmYear{2010}
```

`\acmMonth{3}`

Note that `\acmArticle` is used not only for journals but also for some conference proceedings.

`\acmArticleSeq` The articles in the same issue of a journal have a *sequence number*. It is used to vertically position the black blob on the first page of some formats. By default it is the same as the article number, but the command `\acmArticleSeq{<n>}` can be used to change it:

```
\acmArticle{39} % The sequence number will be 39 by default
\acmArticleSeq{5} % We redefine it to 5
```

Setting this number to zero suppresses the blob.

`\acmSubmissionID` If your paper got a Submission ID from the Conference Management System, put it here:

```
\acmSubmissionID{123-A56-BU3}
```

`\acmPrice` The macro `\acmPrice{<price>}` sets the price for the article, for example,

```
\acmPrice{25.00}
```

Note that you do not need to put the dollar sign here, just the amount. By default the price is \$15.00, unless the copyright is set to `usgov`, `rightsretained`, `iw3c2w3`, or `iw3c2w3g`, when it is suppressed. Note that to override the defaults you need to set the price *after* the `\setcopyright` command. Also, the command `\acmPrice{}` suppresses the printing of the price.

`\acmISBN` Book-like volumes have ISBN numbers attached to them. The macro `\acmISBN{<ISBN>}` sets it. Normally it is set by the typesetter, for example,

```
\acmISBN{978-1-4503-3916-2}
```

Setting it to the empty string, as `\acmISBN{}`, suppresses printing the ISBN.

`\acmDOI` The macro `\acmDOI{<DOI>}` sets the DOI of the article, for example,

```
\acmDOI{10.1145/9999997.9999999}
```

It is normally set by the typesetter. Setting it to the empty string, as `\acmDOI{}`, suppresses the DOI.

`\acmBadgeR` Some conference articles get special distinctions, for example, the artifact evaluation  
`\acmBadgeL` for PPOPP 2016 (see <http://ctuning.org/ae/ppopp2016.html>). These articles display special badges supplied by the conference organizers. This class provides commands to add these badges: `\acmBadgeR[<url>]{<graphics>}` and `\acmBadgeL[<url>]{<graphics>}`. The first command puts the badge to the right of the title, and the second one—to the left. The arguments have the following meaning: `[<url>]`, if provided, sets the link to the badge authority in the screen version, while `{<graphics>}` sets the graphics file with the badge image. The file must be a cropped square, which is scaled to a standard size in the output. For example, if the badge image is `ae-logo.pdf`, the command is

```
\acmBadgeR[http://ctuning.org/ae/ppopp2016.html]{ae-logo}
```

`\startPage` The macro `\startPage{<page>}` sets the first page of the article in a journal or book. It is used by the typesetter.

`\terms` The command `\keywords{<keyword, keyword,...>}` sets keywords for the article.

`\keywords` They must be separated by commas, for example,

```
\keywords{wireless sensor networks, media access control,
multi-channel, radio interference, time synchronization}
```

CCSXML (*env.*) ACM publications are classified according to the ACM Computing Classification Scheme (CCS). CCS codes are used both in the typeset version of the publications *and* in the metadata in various databases. Therefore you need to provide both  $\TeX$  commands and XML metadata with the paper.

The tool at <http://dl.acm.org/ccs.cfm> can be used to generate CCS codes. After you select the topics, click on “Generate CCS codes” to get results like the following:

```
\begin{CCSXML}
<ccs2012>
  <concept>
    <concept_id>10010520.10010553.10010562</concept_id>
    <concept_desc>Computer systems organization~Embedded systems</concept_desc>
    <concept_significance>500</concept_significance>
  </concept>
  <concept>
    <concept_id>10010520.10010575.10010755</concept_id>
    <concept_desc>Computer systems organization~Redundancy</concept_desc>
    <concept_significance>300</concept_significance>
  </concept>
  <concept>
    <concept_id>10010520.10010553.10010554</concept_id>
    <concept_desc>Computer systems organization~Robotics</concept_desc>
    <concept_significance>100</concept_significance>
  </concept>
  <concept>
    <concept_id>10003033.10003083.10003095</concept_id>
    <concept_desc>Networks~Network reliability</concept_desc>
    <concept_significance>100</concept_significance>
  </concept>
</ccs2012>
\end{CCSXML}

\ccsdesc[500]{Computer systems organization~Embedded systems}
\ccsdesc[300]{Computer systems organization~Redundancy}
\ccsdesc{Computer systems organization~Robotics}
\ccsdesc[100]{Networks~Network reliability}
```

You just need to copy this code and paste it in your paper anywhere before `\maketitle`.

CCS Concepts and user-defined keywords are required for all articles over two pages in length, and are optional for one- and two-page articles (or abstracts).

`\setcopyright` There are several possibilities for the copyright of the papers published by the ACM: the authors may transfer the rights to the ACM, license them to the ACM, some or all authors might be employees of the US or Canadian governments, etc. Accordingly the

Table 3: Parameters for the `\setcopyright` command

| Parameter                       | Meaning                                                                                                                                                                                                                                                                         |
|---------------------------------|---------------------------------------------------------------------------------------------------------------------------------------------------------------------------------------------------------------------------------------------------------------------------------|
| <code>none</code>               | The copyright and permission information is not typeset. (This is the option for some ACM conferences.)                                                                                                                                                                         |
| <code>acmcopyright</code>       | The authors transfer the copyright to the ACM (the “traditional” choice).                                                                                                                                                                                                       |
| <code>acmlicensed</code>        | The authors retain the copyright but license the publication rights to ACM.                                                                                                                                                                                                     |
| <code>rightsretained</code>     | The authors retain the copyright and publication rights to themselves or somebody else.                                                                                                                                                                                         |
| <code>usgov</code>              | All the authors are employees of the US government.                                                                                                                                                                                                                             |
| <code>usgovmixed</code>         | Some authors are employees of the US government.                                                                                                                                                                                                                                |
| <code>cagov</code>              | All the authors are employees of the Canadian government.                                                                                                                                                                                                                       |
| <code>cagovmixed</code>         | Some authors are employees of the Canadian government.                                                                                                                                                                                                                          |
| <code>licensedusgovmixed</code> | Some authors are employees of the US government, and the publication rights are licensed to ACM.                                                                                                                                                                                |
| <code>licensedcagov</code>      | All the authors are employees of the Canadian government, and the publication rights are licensed to ACM.                                                                                                                                                                       |
| <code>licensedcagovmixed</code> | Some authors are employees of the Canadian government, and the publication rights are licensed to ACM.                                                                                                                                                                          |
| <code>othergov</code>           | Authors are employees of a government other than the US or Canada.                                                                                                                                                                                                              |
| <code>licensedothergov</code>   | Authors are employees of a government other than the US or Canada, and the publication rights are licensed to ACM.                                                                                                                                                              |
| <code>iw3c2w3</code>            | Special statement for conferences organized by IW3C2.                                                                                                                                                                                                                           |
| <code>iw3c2w3g</code>           | Special statement for conferences organized by IW3C2, when some authors are approved Google employees.                                                                                                                                                                          |
| <code>cc</code>                 | Creative Commons license. If this key is set, <i>doclicense</i> images are used to typeset the license. See also <code>\setcctype</code> command. Note that at present this license can be used only for <code>acmengage</code> format or for <code>nonacm</code> publications. |

command `\setcopyright{...}` is introduced. Its argument is the copyright status of the paper, for example, `\setcopyright{acmcopyright}`. The possible values for this command are listed in Table 3. This command must be placed in the preamble, before `\begin{document}`. Additional information about ACM copyright rules is discussed in Section ??.

`\setcctype` If Creative Commons license is used, the package by default chooses CC-BY 4.0 Attribution 4.0 International license. You can override this choice by the command `\setcctype[<version>]{<type>}`, where [*<version>*] can be either 3.0 or 4.0 (4.0 by default), and {*<type>*} can be one of `zero`, `by`, `by-sa`, `by-nd`, `by-nc`, `by-nc-sa`, `by-nc-nd` (see <https://creativecommons.org/licenses/> for the explanation). This command should be used in the preamble only.

Material published under Creative Commons license should include the corresponding icon. A modern  $\text{\TeX}$  distribution includes these icons in the package *doclicense*. In case your distribution does not have them, ACM provides a file `ccicons.zip` with these icons. Just unzip it in the same directory where your document is.

The ACM submission software should generate the right command for you to paste into your file.

`\copyrightyear` Each copyright statement must have the year of copyright. By default it is the same as `\acmYear`, but you can override this using the macro `\copyrightyear`, e.g.,

```
\acmYear{2016}
\copyrightyear{2015}
```

There is a special case for a personal copy that the authors may be allowed to generate for their use or a posting on a personal site (check the instructions for the specific journal or conference for the details). The document option `authorversion=true` produces a special form of the copyright statement for this case. Note that you still need the `\setcopyright` command and (optionally) `\copyrightyear` command to tell TeX about the copyright owner and year. Also, you should be aware that due to the different sizes of the permission blocks for the printed version and authors' version, the page breaks might be different between them.

`abstract (env.)` The environment `abstract` must *precede* the `\maketitle` command. Again, this is different from the standard L<sup>A</sup>T<sub>E</sub>X. Putting `abstract` after `\maketitle` will trigger an error.

`teaserfigure (env.)` A special kind of figure is used for many two-column conference proceedings. This figure is placed just after the authors but before the main text. The environment `teaserfigure` is used for these figures. This environment must be used *before* `\maketitle`, for example,

```
\begin{teaserfigure}
  \includegraphics[width=\textwidth]{sampleteaser}
  \caption{This is a teaser}
  \label{fig:teaser}
\end{teaserfigure}
```

`\settopmatter` Some information in the top matter is printed for certain journals or proceedings and suppressed for others. You can override these defaults using the command `\settopmatter{<settings>}`. The settings and their meanings are listed in Table 4. For example,

```
\settopmatter{printacmref=false, printccs=true, printfolios=true}
```

The parameter `authorsperrow` requires some explanation. In conference proceedings authors' information is typeset in boxes, several boxes per row (see `sample-sigconf.pdf`, `sample-sigplan.pdf`, etc.). The number of boxes per row is determined automatically. If you want to override this, you can do it using this parameter, for example,

```
\settopmatter{authorsperrow=4}
```

However, in most cases you should *not* do this and should use the default settings. Setting `authorsperrow` to 0 will revert it to the default settings.

The parameter `printacmref` specifies whether to print the ACM bibliographic entry (default), or not. Note that this entry is required for all articles over one page in length, and is optional for one-page articles (abstracts).

`\received` The command `\received[<stage>]{<date>}` sets the history of the publication.

Table 4: Settings for the `\settopmatter` command

| Parameter                  | Values     | Meaning                                                                        |
|----------------------------|------------|--------------------------------------------------------------------------------|
| <code>printccs</code>      | true/false | Whether to print CCS categories                                                |
| <code>printacmref</code>   | true/false | Whether to print the ACM bibliographic entry                                   |
| <code>printfolios</code>   | true/false | Whether to print page numbers (folios)                                         |
| <code>authorsperrow</code> | numeric    | Number of authors per row for the title page in conference proceedings formats |

The `[\stage]` argument is optional; the default is Received for the first date and revised for the subsequent ones. For example,

```
\received{20 February 2007}
\received[revised]{12 March 2009}
\received[accepted]{5 June 2009}
```

`\maketitle` The macro `\maketitle` must be the last command in the top-matter group. That is it must follow the commands defined in this section.

`\shortauthors` After the command `\maketitle`, the macro `\shortauthors` stores the names of the authors for the running head. You can redefine it if the list of author's name is too long, e.g.,

```
\maketitle
\renewcommand{\shortauthors}{Zhou et al.}
```

## 2.4 Top matter of ACM Engage materials

ACM Engage materials resemble conference proceedings, but have some special features. First, as a rule, they are released under a Creative Commons license. By default CC-BY is used. However, if you want to use another variant of CC license, use `\setcctype` command, for example, `\setcctype{by-nc}`. Second, abstract is called *synopsis*. Third, there are special top matter items used for the materials, such as *Course*, *Resource Type*, *Programming Language*, *CS Topics*.

`\setengagemetadata` These items are set with the command `\setengagemetadata{<name>}{<value>}`, for example,

```
\setengagemetadata{Course}{CS1}
\setengagemetadata{Programming Language}{Python}
\setengagemetadata{Knowledge Unit}{Programming Concepts}
\setengagemetadata{CS Topics}{Functions, Data Types, Expressions,
Mathematical Reasoning}
```

Note that the type of Creative Commons license, if such license is used, is automatically added to the metadata.

## 2.5 ACM cover page

ACM cover pages are forms of extended abstracts that are added to journals at the late stage. Authors prepare them as separate .tex files using acmcp format. At present only JDS uses them, but in the future this may change.

There are several top matter commands specific for this format.

`\acmArticleType` There are five article types accepted by JDS: *Research* (the default), *Review*, *Discussion*, *Invited*, and *Position*. The command `\acmArticleType{<type>}` sets the article type, for example

```
\acmArticleType{Review}
```

`\acmCodeLink` The commands `\acmCodeDataLink{<link>}` and `\acmDataLink{<link>}` set the links  
`\acmDataLink` to the data and code accompanying the paper, for example,

```
\acmCodeLink{https://github.com/repository/code}
\acmDataLink{https://datadryad.org/stash/dataset/doi:DOI}
```

You may repeat these commands if you have several repositories.

ACM cover page should have the following obligatory sections:

- Problem statement,
- Methods,
- Results,
- Significance.

Sometimes the addresses extracted from the authors' data are too long to fit on the page. In this case the command `\authorsaddresses` can be use to override them, for example,

```
\authorsaddresses{Corresponding author: Ben Trovato,
\href{mailto:trovato@corporation.com}{trovato@corporation.com};
Institute for Clarity in Documentation, P.O. Box 1212, Dublin,
Ohio, USA, 43017-6221}
```

## 2.6 Internationalization

ACM accepts publications in languages other than English, as well as papers in English with translations of titles, subtitles, keywords and abstracts into other languages. Papers in languages other than English usually have titles, subtitles (if applicable), keywords and abstracts in English. Note that CCS concepts are always typeset in English.

To submit these papers you need to set the option language in the `\documentclass` command. This option can be repeated, for example,

```
\documentclass[sigconf, language=french, language=english]{acmart}
```

The last language in the list is the main language of the paper, i.e. the one for the main title, abstract, body, etc. The other languages are *secondary*, and used for translated titles, keywords, abstracts. Thus the paper above is written in English, and has a secondary abstract and a secondary title in French. On the other hand, a paper in French with secondary titles and abstracts in English and German should use, for example

```
\documentclass[sigconf,
language=german,
language=english,
language=french]{acmart}
```

This key can use any language defined in *babel* package [3] (currently the package is tested with English, French, German and Spanish languages; other languages may require a translation of `\keywordsname` macro). Actually *acmart* loads *babel* internally, so you can use the facilities provided by this package.

If this key is set, you have access to several additional top matter commands.

`\translatedtitle` The commands `\translatedtitle{<language>}title`, `\translatedsubtitle{<language>}subtitle`  
`\translatedsubtitle` and `\translatedkeywordslanguagekeywords` are used to set title, subtitle and key-  
`\translatedkeywords` words in the secondary language. For example, a paper in English with French title and abstract may set

```
\title{A note on computational complexity}
\translatedtitle{french}{Remarque sur la complexit\'e de calcul}
```

while a paper in French should set

```
\title{Remarque sur la complexit\'e de calcul}
\translatedtitle{english}{A note on computational complexity}
```

`translatedabstract (env)` Similarly, `translatedabstract` environment has a mandatory language argument, for example,

```
\begin{translatedabstract}{english}
  This is the English version of the abstract
\end{translatedabstract}
```

You can repeat these commands if a paper has more than one secondary language.

Use the standard commands (`\title`, `\subtitle`, `\keywords`, `abstract`) for the main language of the paper.

## 2.7 Algorithms

There are now several good packages for typesetting algorithms [4, 5, 6], and the authors are free to choose their favorite one.

## 2.8 Figures and tables

The new ACM styles use the standard L<sup>A</sup>T<sub>E</sub>X interface for figures and tables. There are some important items to be aware of, however.

1. The captions for figures must be entered *after* the figure bodies and for tables *before* the table bodies.
2. The ACM uses the standard types for figures and tables and adds several new ones. In total there are the following types:

**figure**, **table**: a standard figure or table taking a full text width in one-column formats and one column width in two-column formats.

**figure\***, **table\*** in two-column formats, a special figure or table taking a full text width.

**teaserfigure**: a special figure before `\maketitle`.

3. Accordingly, when scaling images, one should use the following sizes:

- (a) For `teaserfigure`, `figure` in one-column mode or `figure*` in two-column mode, use `\textwidth`. In one-column mode, you can also use `\columnwidth`, which coincides with `\textwidth` in this case.
- (b) For `figure` in two-column mode, use `\columnwidth`.

It is strongly recommended to use the package `booktabs` [7] and follow its main principles of typography with respect to tables:

- 1. Never, ever use vertical rules.
- 2. Never use double rules.

It is also a good idea not to overuse horizontal rules.

For table *footnotes* you have several options described in the TeX FAQ [1]. The simplest one is to use a `\minipage` environment:

```
\begin{table}
\caption{Simulation Configuration}
\label{tab:conf}
\begin{minipage}{\columnwidth}
\begin{center}
\begin{tabular}{ll}
\toprule
TERRAIN\footnote{This is a table footnote. This is a
table footnote. This is a table footnote.} &
(200\,m$\times$200\,m) Square\\
Node Number & 289\\
Node Placement & Uniform\\
Application & Many-to-Many/Gossip CBR Streams\\
Payload Size & 32 bytes\\
Routing Layer & GF\\
MAC Layer & CSMA/MMSN\\
Radio Layer & RADIO-ACCNOISE\\
Radio Bandwidth & 250Kbps\\
Radio Range & 20m--45m\\
\bottomrule
\end{tabular}
\end{center}
\bigskip
\footnotesize\emph{Source:} This is a table
sourcenote. This is a table sourcenote. This is a table
sourcenote.

\emph{Note:} This is a table footnote.
\end{minipage}
\end{table}
```

Tables and figures are by default centered. However, in some cases (for example, when you use several subimages per figure) you may need to override this. A good way to do so is to put the contents into a `\minipage` of the width `\columnwidth`.

## 2.9 Descriptions of images

`\Description` Some readers of ACM publications might be visually challenged. These readers might use a voice-over software to read aloud the papers. It is important to provide them a description of each image used in the paper.

The command `\Description[short description]{long description}` should be placed inside every figure, `teaserfigure` or `marginfigure` environment to provide a description of the image(s) used in the figure. Unlike `\caption`, which is used alongside the image, `\Description` is intended to be used instead of the image, for example,

```
\begin{figure}
  \centering
  \includegraphics{voltage}
  \Description{A bell-like histogram centered at  $0.5V$  with most
    measurements between  $0.2V$  and  $0.8V$ }
  \caption{Histogram of the measurements of voltage}
  \label{fig:voltage}
\end{figure}
```

At present the lack of descriptions generates a warning at compilation.

## 2.10 Theorems

The ACM classes define two theorem styles and several pre-defined theorem environments:

**acmplain:** this is the style used for theorem, conjecture, proposition, lemma and corollary, and

**acmdefinition:** this is the style used for example and definition.

These environments are defined by default. In the unusual circumstance that a user does not wish to have these environments defined, the option `acmthm=false` in the preamble will suppress them.

Sometimes authors want to define new theorem-like constructs that use theorem counters. These constructs must be defined either after `\begin{document}`, or delayed using `\AtEndPreamble` macro, for example,

```
\AtEndPreamble{%
  \theoremstyle{acmdefinition}
  \newtheorem{remark}[theorem]{Remark}}
```

## 2.11 Online-only and offline-only material

`printonly` (*env.*) Some supplementary material in ACM publications is put online but not in the printed version. The text inside the environment `screenonly` will be typeset only when the option `screen` (see Section 2.2) is set to true. Conversely, the text inside the environment `printonly` is typeset only when this option is set to false. For example,

```
\section{Supplementary materials}

\begin{printonly}
```

Supplementary materials are available in the online version of this paper.  
`\end{printonly}`

`\begin{screenonly}`  
 (The actual supplementary materials.)  
`\end{screenonly}`

We use the `comment` package for typesetting this code, so `\begin` and `\end` should start on a line of their own with no leading or trailing spaces.

## 2.12 Note about anonymous mode

`anonsuppress (env.)` When the option `anonymous` is selected,  $\text{\TeX}$  suppresses author information (including the number of authors) for a blind review. However, sometimes the information identifying the authors may be present in the body of the paper. For example,

```
\begin{anonsuppress}
  This is the continuation of the previous work by the author
  \cite{prev1, prev2}.
\end{anonsuppress}
```

As for the `printonly` and `screenonly` environments, `\begin{anonsuppress}` and `\end{anonsuppress}` should start on a line of their own with no leading or trailing spaces.

`\anon` To suppress short snippets of information, use the command `\anon[<substitute>]{<suppressed-text>}`. By default [*<substitute>*] is the word `ANONYMOUS`. Examples:

```
This work was performed at \anon{NSA}.
This work was performed at \anon[No Such Agency]{NSA}.
```

## 2.13 Acknowledgments

The traditional “Acknowledgments” section is conventionally used to thank persons and granting agencies for their help and support. However, there are several important considerations about this section.

First, in anonymous mode this section must be omitted: it gives too much information to reviewers. Second, data about grants is extracted and stored separately by the postprocessing software. ACM classes provide facilities for both these tasks.

`acks (env.)` The environment `acks` starts an unnumbered section “Acknowledgments” unless the anonymous mode is chosen. Put all thanks inside this environment.

As for the `printonly` and `screenonly` environments, `\begin{acks}` and `\end{acks}` should start on a line of their own with no leading or trailing spaces.

`\grantsponsor` All financial support *must* be listed using the commands `\grantsponsor` and  
`\grantnum` `\grantnum`. These commands tell the postprocessing software about the granting organization and grant. The format of these commands is the following:

```
\grantsponsor{<sponsorID>}{<name>}{<url>}  

\grantnum[<url>]{<sponsorID>}{<number>}.
```

Here  $\{\langle sponsorID \rangle\}$  is the unique ID used to match grants to sponsors,  $\{\langle name \rangle\}$  is the name of the sponsor,  $\{\langle url \rangle\}$  is its URL, and  $\{\langle number \rangle\}$  is the grant number. The  $\{\langle sponsorID \rangle\}$  of the `\grantnum` command must correspond to the  $\{\langle sponsorID \rangle\}$  of a `\grantsponsor` command. Some awards have their own web pages, which you can include using the optional argument of the `\grantnum` command.

At present  $\{\langle sponsorID \rangle\}$  is chosen by the authors and can be an arbitrary key in the same way the label of a `\cite` is arbitrarily chosen. There might be a change to this policy if the ACM decides to create a global database of sponsoring organizations.

Example:

```
\begin{acks}
  The authors would like to thank Dr. Yuhua Li for providing the
  matlab code of the \textit{BEPS} method.

  The authors would also like to thank the anonymous referees for
  their valuable comments and helpful suggestions. This work is
  supported by the \grantsponsor{GS501100001809}{National Natural
  Science Foundation of
  China}{https://doi.org/10.13039/501100001809} under Grant
  No.: ~\grantnum{GS501100001809}{61273304}
  and ~\grantnum{http://www.nnsf.cn/youngscientists}{GS501100001809}{Young
  Scientists' Support Program}.
\end{acks}
```

## 2.14 Bibliography

The ACM lets you use either Bib $\TeX$  or Bib $\LaTeX$  to process your references: they require slightly different setup of your  $\LaTeX$  file, as detailed in the following subsections.

### 2.14.1 Processing using Bib $\TeX$

This uses the `natbib` package for formatting references and the Bib $\TeX$  style file `ACM-Reference-Format.bst` for Bib $\TeX$  processing. You can disable loading of `natbib` using the option `natbib=false` in `\documentclass`. However, it is not recommended, as well as the use of Bib $\TeX$  styles other than `ACM-Reference-Format.bst`, and may delay the processing of the manuscript.

`\citestyle` If you use `natbib`, you can select one of two predefined citation styles using the command `\citestyle`: the author-year format `acmauthoryear` or the numeric format `acmnumeric`. For example,

```
\citestyle{acmauthoryear}
```

Note that numeric citations are the default mode for most formats.

`\setcitestyle` You can further customize `natbib` using the `\setcitestyle` command, for example,

```
\setcitestyle{numbers,sort&compress}
```

One of the more common versions is

```
\setcitestyle{nosort}
```

It is useful if you do not like the way natbib sorts citation lists.

If you use natbib, then commands like `\citep` and `\citeauthor` are automatically supported. The command `\shortcite` is the same as `\cite` in numerical mode and cites the year in author-date mode.

Note that before version 1.48 the command `\citeyear` put the year in parentheses. In version 1.48 and later it produces just the year; the command `\citeyearpar` can be used to emulate its old behavior.

There are several customized BibTeX entry types and fields in the ACM style file `ACM-Reference-Format.bst` that you may want to be aware of.

The style supports the fields `doi` and `url`, for example,

```
doi = "10.1145/1188913.1188915",
url = "http://ccrma.stanford.edu/~jos/bayes/bayes.pdf",
```

Normally the printing of URL is suppressed if DOI is present. However, there is a special field `distinctURL`. If it is present and is not zero, URL is printed even if DOI is present.

The style supports the arXiv-recommended fields `eprint` and (optionally) `primaryclass`, for example,

```
eprint = "960935712",
primaryclass = "cs",
```

See the examples at <https://arxiv.org/help/hypertex/bibstyles>.

There are several special entry types. Types `online` and `game` are used for Web pages and games, for example,

```
@online{Thornburg01,
  author = "Harry Thornburg",
  year = "2001",
  title = "Introduction to Bayesian Statistics",
  url = "http://ccrma.stanford.edu/~jos/bayes/bayes.html",
  month = mar,
  lastaccessed = "March 2, 2005",
}
```

Entry types `artifactsoftware`, `artifactdataset` (with synonyms `software` and `dataset`) can be used to cite software artifacts and datasets, for example,

```
@ArtifactSoftware{R,
  title = {R: A Language and Environment for Statistical Computing},
  author = {{R Core Team}},
  organization = {R Foundation for Statistical Computing},
  address = {Vienna, Austria},
  year = {2019},
  url = {https://www.R-project.org/},
}
@ArtifactDataset{UMassCitations,
  author = {Sam Anzaroot and Andrew McCallum},
  title = {{UMass} Citation Field Extraction Dataset},
  year = 2013,
  url =
    {http://www.iesl.cs.umass.edu/data/data-umasscitationfield},
}
```

```

lastaccessed = {May 27, 2019}
}

```

For these entry types you can use the `lastaccessed` field to add the access date for the URL.

There are two ways to enter video or audio sources in the bibliography corresponding to two different possibilities. For standalone sources available online, you can use an online entry and set its `howpublished` field. For example,

```

@online{Obama08,
  author = "Barack Obama",
  year = "2008",
  title = "A more perfect union",
  howpublished = "Video",
  day = "5",
  url = "http://video.google.com/videoplay?docid=6528042696351994555",
  month = mar,
  lastaccessed = "March 21, 2008",
}

```

For sources available as attachments to conference proceedings and similar documents, you can use the usual `inproceedings` entry type and set its `howpublished` field:

```

@Inproceedings{Novak03,
  author = "Dave Novak",
  title = "Solder man",
  booktitle = "ACM SIGGRAPH 2003 Video Review on Animation theater Program",
  year = "2003",
  publisher = "ACM Press",
  address = "New York, NY",
  pages = "4",
  month = "March 21, 2008",
  doi = "10.9999/woot07-S422",
  howpublished = "Video",
}

```

Sometimes you need to cite a complete issue of a journal. The periodical entry type is intended for this:

```

@periodical{JCohen96,
  key = "Cohen",
  editor = "Jacques Cohen",
  title = "Special issue: Digital Libraries",
  journal = "Communications of the {ACM}",
  volume = "39",
  number = "11",
  month = nov,
  year = "1996",
}

```

If you do not know the year of publication, the style will add “[n. d.]” (for “no date”) to the entry.

If you do not know the author (this is often the case for online entries), use the key field to add a key for sorting and citations, for example,

```
@online{TUGInstmem,
  key =      {TUG},
  year =      2017,
  title =      "Institutional members of the {\TeX} Users Group",
  url =      "http://wwtug.org/instmem.html",
  lastaccessed = "May 27, 2017",
}
```

A note about sorting. The current ACM bibliography styles always sort the entries according to authors names and publication year. There is a controversy about sorting names with “von” or “van” part: should Ludwig van Beethoven be sorted under “V” or under “B”? The American practice is to use “van” in sorting, i.e. to file van Beethoven under “V”. However, some authorities recommend to sort Dutch persons according to their last names (see e.g. <https://www.ifla.org/files/assets/cataloguing/pubs/names-of-persons.1996.pdf>). While I do not want to take a part in this dispute, I would like to point to the old “noopsort” trick by Oren Patashnik. Add to the .bib file the line

```
@PREAMBLE{"\providecommand{\noopsort}[1]{}"}
```

and then encode the author as

```
author = {Ludwig {\noopsort{Beethoven}}van Beethoven},
```

This will make the author to be sorted as “Beethoven” rather than “van Beethoven”.

The current bst style defines a number of macros for common journal names. In particular, all journals listed in Table 5 are included, so you can use strings like `journal = taccess` for *ACM Transactions on Accessible Computing*.

### 2.14.2 Processing using Bib<sub>La</sub>TeX

You will find in this package two sets of style files for Bib<sub>La</sub>TeX, `acmnumeric` and `acmauthoryear`, that mimic the behaviour of the `ACM-Reference-Format.bst` Bib<sub>TeX</sub> style. They provide you access to all the power of Bib<sub>La</sub>TeX and already include support for advanced citation of software artefact from the `biblatex-software` package, also separately available on CTAN. Look at the `biblatex-software` documentation to learn more about what it offers.

There are a few key differences in how the <sub>La</sub>TeX sources are set up when using Bib<sub>La</sub>TeX instead of Bib<sub>TeX</sub>, that we summarize briefly here (please refer to the official Bib<sub>La</sub>TeX documentation for more details).

In the preamble of your document you need to load the Bib<sub>La</sub>TeX package and select the appropriate bibliography style, as follows

```
\RequirePackage[
  datamodel=acmdatamodel,
  style=acmnumeric, % use style=acmauthoryear for publications that require it
]{biblatex}
```

Also in the preamble, you need to declare the bibliography sources files using the `\addbibresource` directive (one `\addbibresource` command per source file), e.g.:

```
\addbibresource{software.bib}
\addbibresource{sample-base.bib}
```

At the end of the document, where you want the bibliography to appear, you need to place the command `\printbibliography`.

Look at the `sample-*-biblatex.tex` files that can be found in the samples directory after running `make` for templates showcasing these Bib<sub>La</sub>T<sub>E</sub>X styles.

## 2.15 Colors

While printed ACM publications are usually black and white, screen mode allows the use of colors. The ACM classes pre-define several colors according to [8]: `ACMBlue`, `ACMYellow`, `ACMOrange`, `ACMRed`, `ACMLightBlue`, `ACMGreen`, `ACMPurple` and `ACMDarkBlue`. You can use them in color assignments.

The ACM provides the following recommendation on color use.

The most accessible approach would be to ensure that your article is still readable when printed in greyscale. The most notable reasons for this are:

1. The most common type of inherited Color Vision Deficiency (CVD) is red-green (in which similar-brightness colors that differ only in their amounts of red or green are often confused), and it affects up to 8% of males and 0.5% of females of Northern European descent.
2. The most common type of acquired Color Vision Deficiency (CVD) is blue-yellow (including mild cases for many older adults).
3. Most printing is in black and white.
4. Situational impairments (e.g., bright sunlight shining on a mobile screen) tend to reduce the entire color gamut, reducing color discriminability.

**Note:** It is *not* safe to encode information using only variations in color (i.e., only differences in hue and/or saturation) as there is bound to be someone affected!

To ensure that you are using the most accessible colors, the ACM recommends that you choose sets of colors to help ensure suitable variations in when printed in greyscale by using either of the following tools:

1. ColourBrewer: <http://colorbrewer2.org/>
2. ACE: The Accessible Colour Evaluator: <http://daprlab.com/ace/> for designing WCAG 2.0 compliant palettes.

## 2.16 Other notable packages and typographic remarks

Several other packages are recommended for specialized tasks.

The package `subcaption` [9] is recommended for complex figures with several subplots or subfigures that require separate subcaptioning. The packages `nomencl` [10] and `glossaries` [11] can be used for the automatic creation of the lists of symbols and concepts used.

By default `acmart` prevents all widows and orphans (i.e., lonely lines at the beginning or end of the page) and hyphenation at the end of the page. This is done by the rather strict settings

```
\widowpenalty=10000
\clubpenalty=10000
\brokenpenalty=10000
```

However, this may lead to frustrating results when the authors must obey a page limit. Setting these penalties to smaller values may help if you absolutely need to.

Another problem might be the too strict line breaking rules. Again, a strategically placed `\sloppy` command or putting the problematic paragraph inside `sloppypar` environment might help—but beware, the results might be, well, sloppy.

Note that the uppercasing in section titles is done using the `textcase` package [12], so the command `\NoCaseChange` inside the title may help to prevent extraneous uppercasing.

## 2.17 Counting words

Some ACM conferences use word count limits for papers. The calculation of word number for a paper with math, tables and figures is not a trivial task. Currently the authoritative word count is done by translating the PDF to text and using `wc -w` on the output. Authors can use the package `texcount` (used by Overleaf) to get an estimate of the word count. To facilitate this one adds to the beginning of the package metacomments

```
%TC:macro \cite [option:text,text]
%TC:macro \citep [option:text,text]
%TC:macro \citet [option:text,text]
%TC:envir table 0 1
%TC:envir table* 0 1
%TC:envir tabular [ignore] word
%TC:envir displaymath 0 word
%TC:envir math 0 word
%TC:envir comment 0 0
```

and uses `\begin{math}...\end{math}` instead of dollar signs for math. Note that the count is in any case approximate, and the final decision of editors is based on PDF count.

The script `texcount` provides a report of word count in the document.

## 2.18 Creative Commons licenses for ACM publications

At present ACM does not allow the authors to typeset Creative Commons license for most ACM publications. These licenses can be used under an agreement with the ACM publishing office. In this case they are inserted by ACM itself.

The exceptions are ACM Engage format, which allows Creative Commons license, and conferences organized and copyrighted by IW3C2. In these cases the authors should use correspondingly `\setcopyright{cc}`, `\setcopyright{iw3c2w3}`, or `\setcopyright{iw3c2w3g}` (the latter should be used by Google employees).

Yet another case is the typesetting of non-ACM materials, when the option `nonacm` is used. This case is somewhat opposite, because for this case *only* Creative Commons licenses are supported.

The command `\setcopyright{cc}` produces an error unless the format is `acmengage` or `nonacm` option is selected. On the other hand, if the option `nonacm` is selected, any argument of `\setcopyright` other than `cc` is treated as `none`.

## 2.19 Disabled or forbidden commands

The goal of `acmart` package is to provide a uniform look and feel for ACM publications. Accordingly, a number of commands is forbidden or disabled in `acmart`.

You may *not* put several authors or several e-mails into a `\author` or `\email` command. This may lead to errors or warning.

You cannot change `\baselinestretch` in your document: this produces an error.

You should not abuse the command `\vspace`: this command may disturb the type-setting of ACM papers.

You should not load `amssymb` package since the package `acmart` defines the corresponding symbols itself.

## 2.20 Notes for wizards

Sometimes you need to change the behavior of `acmart`. The usual way to do this is to redefine commands in the preamble. However, these definitions are executed *after* `acmart` is loaded and certain decisions are made. This presents a number of problems.

For example, one may want to use the `titletoc` package with `acmart`. This package should be loaded before `hyperref`. However, since `acmart` loads `hyperref` itself, the line `\usepackage{titletoc}` in the preamble will lead to grief (see <http://tex.stackexchange.com/questions/357265/using-titletoc-with-acm-acmart-style>).

Another example is passing options to a package. Suppose you want to use the `dvipsnames` option of the `xcolor` package. Normally you cannot do this because `acmart` loads this package itself without options.

The file `acmart-preload-hook.tex` can be used to solve these problems. If this file exists, it will be processed before any other package. You can use this file to load packages or pass options to them. For example, if you put in this file

```
\let\LoadClassOrig\LoadClass
\renewcommand\LoadClass[2][\LoadClassOrig[#1]{#2}%
\usepackage{titletoc}
```

then `titletoc` will be loaded before `hyperref`. If you put in this file

```
\PassOptionsToPackage{dvipsnames}{xcolor}
```

you will pass `dvipsnames` to `xcolor`.

**Important note.** This hook makes it too easy to create a manuscript that is not acceptable by the ACM. It is even easier to create a file that cannot be compiled. So please do not use it *unless you know what you are doing*. And if you use it, *do not ask for support*. If you decide to use this hook, you are on your own.

`\AtBeginMaketitle` Another hook is `\AtBeginMaketitle`. The commands in this hook are executed before `\maketitle`, for example,

```
\AtBeginMaketitle{\acmPrice{125.00}}
```

## 2.21 Currently supported publications

Table 5: ACM publications and arguments of the \acmJournal command

| Abbreviation | Publication                                                                |
|--------------|----------------------------------------------------------------------------|
| ACMJCSS      | ACM Journal on Computing and Sustainable Societies                         |
| CIE          | ACM Computers in Entertainment                                             |
| CSUR         | ACM Computing Surveys                                                      |
| DLT          | Distributed Ledger Technologies: Research and Practice                     |
| DGOV         | Digital Government: Research and Practice                                  |
| DTRAP        | Digital Threats: Research and Practice                                     |
| FAC          | Formal Aspects of Computing                                                |
| GAMES        | ACM Games: Research and Practice                                           |
| HEALTH       | ACM Transactions on Computing for Healthcare                               |
| IMWUT        | PACM on Interactive, Mobile, Wearable and Ubiquitous Technologies          |
| JACM         | Journal of the ACM                                                         |
| JATS         | ACM Journal on Autonomous Transportation Systems                           |
| JDIQ         | ACM Journal of Data and Information Quality                                |
| JDS          | ACM/IMS Journal of Data Science                                            |
| JEA          | ACM Journal of Experimental Algorithmics                                   |
| JERIC        | ACM Journal of Educational Resources in Computing                          |
| JETC         | ACM Journal on Emerging Technologies in Computing Systems                  |
| JOCCH        | ACM Journal on Computing and Cultural Heritage                             |
| JRC          | ACM Journal on Responsible Computing                                       |
| PACMCGIT     | Proceedings of the ACM on Computer Graphics and Interactive Techniques     |
| PACMHCI      | PACM on Human-Computer Interaction                                         |
| PACMNET      | PACM on Networking                                                         |
| PACMPL       | PACM on Programming Languages                                              |
| POMACS       | PACM on Measurement and Analysis of Computing Systems                      |
| TAAS         | ACM Transactions on Autonomous and Adaptive Systems                        |
| TACCESS      | ACM Transactions on Accessible Computing                                   |
| TACO         | ACM Transactions on Architecture and Code Optimization                     |
| TALG         | ACM Transactions on Algorithms                                             |
| TALLIP       | ACM Transactions on Asian and Low-Resource Language Information Processing |
| TAP          | ACM Transactions on Applied Perception                                     |
| TCPS         | ACM Transactions on Cyber-Physical Systems                                 |
| TDS          | ACM/IMS Transactions on Data Science                                       |
| TEAC         | ACM Transactions on Economics and Computation                              |
| TECS         | ACM Transactions on Embedded Computing Systems                             |
| TELO         | ACM Transactions on Evolutionary Learning                                  |
| THRI         | ACM Transactions on Human-Robot Interaction                                |
| TIIS         | ACM Transactions on Interactive Intelligent Systems                        |
| TIOT         | ACM Transactions on Internet of Things                                     |
| TISSEC       | ACM Transactions on Information and System Security                        |
| TIST         | ACM Transactions on Intelligent Systems and Technology                     |
| TKDD         | ACM Transactions on Knowledge Discovery from Data                          |

Table 5: ACM publications and arguments of the `\acmJournal` command (continued)

| Abbreviation | Publication                                                                  |
|--------------|------------------------------------------------------------------------------|
| TMIS         | ACM Transactions on Management Information Systems                           |
| TOCE         | ACM Transactions on Computing Education                                      |
| TOCHI        | ACM Transactions on Computer-Human Interaction                               |
| TOCL         | ACM Transactions on Computational Logic                                      |
| TOCS         | ACM Transactions on Computer Systems                                         |
| TOCT         | ACM Transactions on Computation Theory                                       |
| TODAES       | ACM Transactions on Design Automation of Electronic Systems                  |
| TODS         | ACM Transactions on Database Systems                                         |
| TOG          | ACM Transactions on Graphics                                                 |
| TOIS         | ACM Transactions on Information Systems                                      |
| TOIT         | ACM Transactions on Internet Technology                                      |
| TOMACS       | ACM Transactions on Modeling and Computer Simulation                         |
| TOMM         | ACM Transactions on Multimedia Computing, Communications and Applications    |
| TOMPECS      | ACM Transactions on Modeling and Performance Evaluation of Computing Systems |
| TOMS         | ACM Transactions on Mathematical Software                                    |
| TOPC         | ACM Transactions on Parallel Computing                                       |
| TOPLAS       | ACM Transactions on Programming Languages and Systems                        |
| TOPS         | ACM Transactions on Privacy and Security                                     |
| TORS         | ACM Transactions on Recommender Systems                                      |
| TOS          | ACM Transactions on Storage                                                  |
| TOSEM        | ACM Transactions on Software Engineering and Methodology                     |
| TOSN         | ACM Transactions on Sensor Networks                                          |
| TQC          | ACM Transactions on Quantum Computing                                        |
| TRETS        | ACM Transactions on Reconfigurable Technology and Systems                    |
| TSAS         | ACM Transactions on Spatial Algorithms and Systems                           |
| TSC          | ACM Transactions on Social Computing                                         |
| TSLP         | ACM Transactions on Speech and Language Processing                           |
| TWEB         | ACM Transactions on the Web                                                  |

Besides the publications listed in Table 5, there is a special “publication” type FACMP, a forthcoming ACM publication, reserved for new journals which are not assigned an ISSN yet.

## 2.22 A note about sigchi-a format

Starting in Spring 2020 ACM retired SIGCHI Extended Abstract format (`sigchi-a`). ACM will not, under any circumstances, accept documents in this format for publication and will not offer technical support to the authors who use this template.

You may use this format in the `nonacm` mode only, as in

```
\documentclass[sigchi-a, nonacm]{acmart}
```

`sidebar (env.)` This format has large margin uses for special figures and tables. This package provides three environments for this with optional captions:  
`marginfigure (env.)`  
`marginfigure (env.)`

**sidebar:** textual information in the margin,

**marginfigure:** a figure in the margin,

**margintable:** a table in the margin.

The environments `figure` and `table` produce figures and tables with the width of the text column. The environments `figure*` and `table*` produce “wide” figures and tables, which take a large part of the margin.

The horizontal sizes of figures are:

1. `figure: \columnwidth`,
2. `marginfigure: \marginparwidth`,
3. `figure*: \fulltextwidth`.

## 3 Implementation

### 3.1 Identification

We start with a declaration of who we are. Most .dtx files put driver code in a separate .drv driver file. We roll this code into the main file and use the pseudo-guard <gobble> for it.

```
1 <class>\NeedsTeXFormat{LaTeX2e}
2 <*gobble>
3 \ProvidesFile{acmart.dtx}
4 </gobble>
5 <class>\ProvidesClass{acmart}
6 [2022/10/24 v1.88 Typesetting articles for the Association for Computing Machinery]
```

And the driver code:

```
7 <*gobble>
8 \documentclass{ltxdoc}
9 \usepackage{array,booktabs,amsmath,graphicx,fancyvrb,tabularx, longtable}
10 \usepackage[tt=false, type1=true]{libertine}
11 \usepackage[varqu]{zi4}
12 \usepackage[libertine]{newtxmath}
13 \usepackage[tableposition=top]{caption}
14 \usepackage{hypdoc}
15 \PageIndex
16 \CodelineIndex
17 \RecordChanges
18 \EnableCrossrefs
19 \begin{document}
20   \DocInput{acmart.dtx}
21 \end{document}
22 </gobble>
23 <*class>
24 \def\@classname{acmart}
```

### 3.2 Preload hook

We preload acmart-preload-hook:

```
25 \InputIfFileExists{acmart-preload-hook.tex}{%
26   \ClassWarning{\@classname}{%
27     I am loading acmart-preload-hook.tex. You are fully responsible
28     for any problems from now on.}}{}
```

### 3.3 Options

We need xkeyval since some of our options may have values:

```
29 \RequirePackage{xkeyval}
   We use xstring to check whether user input is valid
30 \RequirePackage{xstring}
   We need iftex to check the engine
31 \RequirePackage{iftex}
```

format The possible formats

```

32 \define@choicekey*+{acmart.cls}{format}[\ACM@format\ACM@format@nr]{%
33 manuscript, acmsmall, acmlarge, acmtog, sigconf, siggraph,
34 sigplan, sigchi, sigchi-a, acmengage, acmcp}[manuscript]{}{%
35 \ClassError{\@classname}{The option format must be manuscript,
36 acmsmall, acmlarge, acmtog, sigconf, siggraph,
37 sigplan, sigchi or sigchi-a}}
38 \def\@DeclareACMFormat#1{\DeclareOptionX{#1}{\setkeys{acmart.cls}{format=#1}}}
39 \@DeclareACMFormat{manuscript}
40 \@DeclareACMFormat{acmsmall}
41 \@DeclareACMFormat{acmlarge}
42 \@DeclareACMFormat{acmtog}
43 \@DeclareACMFormat{sigconf}
44 \@DeclareACMFormat{siggraph}
45 \@DeclareACMFormat{sigplan}
46 \@DeclareACMFormat{sigchi}
47 \@DeclareACMFormat{sigchi-a}
48 \@DeclareACMFormat{acmengage}
49 \@DeclareACMFormat{acmcp}
50 \ExecuteOptionsX{format}

```

\if@ACM@screen Whether we use screen mode

```

51 \define@boolkey+{acmart.cls}[@ACM@]{screen}[true]{%
52 \if@ACM@screen
53 \PackageInfo{\@classname}{Using screen mode}%
54 \else
55 \PackageInfo{\@classname}{Not using screen mode}%
56 \fi}{\PackageError{\@classname}{The option screen can be either true or
57 false}}
58 \ExecuteOptionsX{screen=false}

```

\if@ACM@urlbreakonhyphens

```

59 \define@boolkey+{acmart.cls}[@ACM@]{urlbreakonhyphens}[true]{%
60 \if@ACM@urlbreakonhyphens
61 \PackageInfo{\@classname}{Using breaking urls on hyphens}%
62 \else
63 \PackageInfo{\@classname}{Not breaking urls on hyphens}%
64 \fi}{\PackageError{\@classname}{The option urlbreakonhyphens can be either true or
65 false}}
66 \ExecuteOptionsX{urlbreakonhyphens=true}

```

\if@ACM@acmthm Whether we define theorem-like environments.

```

67 \define@boolkey+{acmart.cls}[@ACM@]{acmthm}[true]{%
68 \if@ACM@acmthm
69 \PackageInfo{\@classname}{Requiring acmthm}%
70 \else
71 \PackageInfo{\@classname}{Suppressing acmthm}%
72 \fi}{\PackageError{\@classname}{The option acmthm can be either true or
73 false}}
74 \ExecuteOptionsX{acmthm=true}

```

\if@ACM@review Whether we use review mode

```

75 \define@boolkey+{acmart.cls}[@ACM@]{review}[true]{%

```

```

76 \if@ACM@review
77   \PackageInfo{\@classname}{Using review mode}%
78   \AtBeginDocument{\@ACM@printfoliostrue}%
79 \else
80   \PackageInfo{\@classname}{Not using review mode}%
81 \fi}{\PackageError{\@classname}{The option review can be either true or
82   false}}
83 \ExecuteOptionsX{review=false}

```

\if@ACM@authorversion Whether we use author's-version mode

```

84 \define@boolkey+{acmart.cls}[@ACM@]{authorversion}[true]{%
85   \if@ACM@authorversion
86     \PackageInfo{\@classname}{Using authorversion mode}%
87   \else
88     \PackageInfo{\@classname}{Not using authorversion mode}%
89   \fi}{\PackageError{\@classname}{The option authorversion can be either true or
90     false}}
91 \ExecuteOptionsX{authorversion=false}

```

\if@ACM@nonacm Special option for non-ACM publications using the ACM typesetting options.

```

92 \define@boolkey+{acmart.cls}[@ACM@]{nonacm}[true]{%
93   \if@ACM@nonacm
94     \PackageInfo{\@classname}{Using nonacm mode}%
95     \AtBeginDocument{\@ACM@printacmreffalse}%
96     % in 'nonacm' mode we disable the "ACM Reference Format"
97     % printing by default, but this can be re-enabled by the
98     % user using \settopmatter{printacmref=true}
99   \else
100     \PackageInfo{\@classname}{Not using nonacm mode}%
101   \fi}{\PackageError{\@classname}{The option nonacm can be either true or
102     false}}
103 \ExecuteOptionsX{nonacm=false}

```

\if@ACM@balance Whether to balance the last page

```

104 \define@boolkey+{acmart.cls}[@ACM@]{balance}[true]{}%
105 \PackageError{\@classname}{The option balance can be either true or
106   false}}
107 \ExecuteOptionsX{balance}

```

\if@ACM@pbalance Whether to balance the last page

```

108 \define@boolkey+{acmart.cls}[@ACM@]{pbalance}[true]{}%
109 \PackageError{\@classname}{The option pbalance can be either true or
110   false}}
111 \ExecuteOptionsX{pbalance=false}

```

\if@ACM@natbib@override This macro is no longer used.

\if@ACM@natbib Whether we use natbib mode

```

112 \define@boolkey+{acmart.cls}[@ACM@]{natbib}[true]{%
113   \if@ACM@natbib
114     \PackageInfo{\@classname}{Explicitly selecting natbib mode}%
115   \else
116     \PackageInfo{\@classname}{Explicitly deselecting natbib mode}%
117   \fi}{\PackageError{\@classname}{The option natbib can be either true or

```

```

118     false}}
119 \ExecuteOptionsX{natbib=true}

\if@ACM@anonymous Whether we use anonymous mode
120 \define@boolkey+{acmart.cls}[@ACM@]{anonymous}[true]{%
121   \if@ACM@anonymous
122     \PackageInfo{\@classname}{Using anonymous mode}%
123   \else
124     \PackageInfo{\@classname}{Not using anonymous mode}%
125   \fi}{\PackageError{\@classname}{The option anonymous can be either true or
126     false}}
127 \ExecuteOptionsX{anonymous=false}

\if@ACM@timestamp Whether we use timestamp mode
128 \define@boolkey+{acmart.cls}[@ACM@]{timestamp}[true]{%
129   \if@ACM@timestamp
130     \PackageInfo{\@classname}{Using timestamp mode}%
131   \else
132     \PackageInfo{\@classname}{Not using timestamp mode}%
133   \fi}{\PackageError{\@classname}{The option timestamp can be either true or
134     false}}
135 \ExecuteOptionsX{timestamp=false}

\if@ACM@authordraft Whether we use author-draft mode
136 \define@boolkey+{acmart.cls}[@ACM@]{authordraft}[true]{%
137   \if@ACM@authordraft
138     \PackageInfo{\@classname}{Using authordraft mode}%
139     \@ACM@timestamptrue
140     \@ACM@reviewtrue
141   \else
142     \PackageInfo{\@classname}{Not using authordraft mode}%
143   \fi}{\PackageError{\@classname}{The option authordraft can be either true or
144     false}}
145 \ExecuteOptionsX{authordraft=false}

\ACM@fontsize The font size to pass to the base class
146 % \changes{v1.87}{2022/08/27}{Added fontsize 8pt}
147 \def\ACM@fontsize{}
148 \DeclareOptionX{8pt}{\edef\ACM@fontsize{\CurrentOption}}
149 \DeclareOptionX{9pt}{\edef\ACM@fontsize{\CurrentOption}}
150 \DeclareOptionX{10pt}{\edef\ACM@fontsize{\CurrentOption}}
151 \DeclareOptionX{11pt}{\edef\ACM@fontsize{\CurrentOption}}
152 \DeclareOptionX{12pt}{\edef\ACM@fontsize{\CurrentOption}}

\ACM@languages The languages of the document
153 \def\ACM@languages{}
154 \DeclareOptionX{language}{%
155   \ifx\ACM@languages\@empty
156     \gdef\ACM@languages{english}\fi
157   \g@addto@macro\ACM@languages{, #1}}

158 \DeclareOptionX{draft}{\PassOptionsToClass{\CurrentOption}{amsart}}
159 \DeclareOptionX{*}{\PassOptionsToClass{\CurrentOption}{amsart}}
160 \ProcessOptionsX
161 \ClassInfo{\@classname}{Using format \ACM@format, number \ACM@format@nr}

```

### 3.4 Setting switches

```
\if@ACM@manuscript Whether we use manuscript mode
162 \newif\if@ACM@manuscript

\if@ACM@journal There are two kinds of publications: journals and books
163 \newif\if@ACM@journal

\if@ACM@journal@bibstrip Sometimes ACM wants a journal-like publication to have conference information in the
bibstrip and vice versa, so we have an additional switch.
164 \newif\if@ACM@journal@bibstrip

\if@ACM@sigchiamode The formatting of SIGCHI extended abstracts is quite unusual. We have a special switch
for them.
165 \newif\if@ACM@sigchiamode

\if@ACM@engage ACM Engage course materials have special formatting
166 \newif\if@ACM@engage
167 \@ACM@engagefalse

\if@ACM@acmcp ACM cover page formatting
168 \newif\if@ACM@acmcp
169 \@ACM@acmcpfalse
```

#### Setting up switches

```
170 \ifnum\ACM@format@nr=5\relax % siggraph
171 \ClassWarning{\@classname}{%
172   The format siggraph is now obsolete.\MessageBreak
173   I am switching to sigconf.}
174 \setkeys{acmart.cls}{format=sigconf}
175 \fi
176 \ifnum\ACM@format@nr=7\relax % sigchi
177 \ClassWarning{\@classname}{%
178   The format sigchi is now obsolete.\MessageBreak
179   I am switching to sigconf.}
180 \setkeys{acmart.cls}{format=sigconf}
181 \fi
182 \ifnum\ACM@format@nr=8\relax % sigchi
183 \ClassWarning{\@classname}{%
184   ACM SIGCHI has retired the SIGCHI-A template\MessageBreak
185   effective immediately. ACM is keeping this template\MessageBreak
186   option available to authors who are working on legacy\MessageBreak
187   documents only. ACM will not, under any circumstances,\MessageBreak
188   accept documents in this format for publication and\MessageBreak
189   will not offer technical support to the authors who use\MessageBreak
190   this template.\MessageBreak
191   ACM SIGCHI is directing Conference leaders and\MessageBreak
192   authors to publish their articles using the SIGCONF\MessageBreak
193   template call.}
194 \fi
195 \ifnum\ACM@format@nr=0\relax
196   \@ACM@manuscripttrue
197 \else
```

```

198 \ACM@manuscriptfalse
199 \fi
200 \ACM@sigchiamodefalse
201 \ifcase\ACM@format@nr
202 \relax % manuscript
203 \ACM@journaltrue
204 \or % acmsmall
205 \ACM@journaltrue
206 \or % acmlarge
207 \ACM@journaltrue
208 \or % acmtog
209 \ACM@journaltrue
210 \or % sigconf
211 \ACM@journalfalse
212 \or % siggraph
213 \ACM@journalfalse
214 \or % sigplan
215 \ACM@journalfalse
216 \or % sigchi
217 \ACM@journalfalse
218 \or % sigchi-a
219 \ACM@journalfalse
220 \ACM@sigchiamodetrue
221 \or % acmengage
222 \ACM@journalfalse
223 \ACM@engagetrue
224 \or % acmcp
225 \ACM@journaltrue
226 \ACM@acmcptrue
227 \AtBeginDocument{\ACM@printacmreffalse}%
228 \fi
229 \if\ACM@journal
230 \ACM@journal@bibstriptrue
231 \else
232 \ACM@journal@bibstripfalse
233 \fi

```

### 3.5 Loading the base class and package

At this point we either have \ACM@fontsize or use defaults

```

234 \ifx\ACM@fontsize\@empty
235 \ifcase\ACM@format@nr
236 \relax % manuscript
237 \def\ACM@fontsize{9pt}%
238 \or % acmsmall
239 \def\ACM@fontsize{10pt}%
240 \or % acmlarge
241 \def\ACM@fontsize{10pt}%
242 \or % acmtog
243 \def\ACM@fontsize{9pt}%
244 \or % sigconf
245 \def\ACM@fontsize{9pt}%
246 \or % siggraph
247 \def\ACM@fontsize{9pt}%

```

```

248 \or % sigplan
249 \def\ACM@fontsize{10pt}%
250 \or % sigchi
251 \def\ACM@fontsize{9pt}%
252 \or % sigchi-a
253 \def\ACM@fontsize{10pt}%
254 \or % acmengage
255 \def\ACM@fontsize{10pt}%
256 \or % acmcp
257 \def\ACM@fontsize{9pt}%
258 \fi
259 \fi
260 \ClassInfo{\@classname}{Using fontsize \ACM@fontsize}
261 \LoadClass[\ACM@fontsize, reqno]{amsart}
262 \RequirePackage{microtype}

    We need etoolbox for delayed code
263 \RequirePackage{etoolbox}

    Booktabs is now the default
264 \RequirePackage{booktabs}

    We need totpages to calculate the number of pages and refcount to use that num-
ber
265 \RequirePackage{refcount}
266 \RequirePackage{totpages}

    The \collect@body macro in amsmath is defined using \def. We load environ to
access the \long version of this command
267 \RequirePackage{environ}

    We use setspace for double spacing
268 \if@ACM@manuscript
269 \RequirePackage{setspace}
270 \onehalfspacing
271 \fi

    We need textcase for better upcasing
272 \RequirePackage{textcase}

273 \if@ACM@acmcp
274 \RequirePackage{framed}
275 \fi

```

### 3.6 Citations

We patch `\setcitestyle` to allow, for example, `\setcitestyle{sort}` and `\setcitestyle{nosort}`. We patch `\citestyle` to warn about undefined citation styles.

```

276 \if@ACM@natbib
277 \RequirePackage{natbib}
278 \renewcommand{\bibsection}{%
279 \section*{\refname}%
280 \phantomsection\addcontentsline{toc}{section}{\refname}%
281 }
282 \renewcommand{\bibfont}{\bibliofont}
283 \renewcommand\setcitestyle[1]{

```

```

284 \@for\@tempa:=#1\do
285 {\def\@tempb{round}\ifx\@tempa\@tempb
286   \renewcommand\NAT@open{(\renewcommand\NAT@close{)}\fi
287   \def\@tempb{square}\ifx\@tempa\@tempb
288     \renewcommand\NAT@open{[]\renewcommand\NAT@close{]}\fi
289   \def\@tempb{angle}\ifx\@tempa\@tempb
290     \renewcommand\NAT@open{<}\renewcommand\NAT@close{>}\fi
291   \def\@tempb{curly}\ifx\@tempa\@tempb
292     \renewcommand\NAT@open{\{}\renewcommand\NAT@close{\}}\fi
293   \def\@tempb{semicolon}\ifx\@tempa\@tempb
294     \renewcommand\NAT@sep{;}\fi
295   \def\@tempb{colon}\ifx\@tempa\@tempb
296     \renewcommand\NAT@sep{:}\fi
297   \def\@tempb{comma}\ifx\@tempa\@tempb
298     \renewcommand\NAT@sep{,}\fi
299   \def\@tempb{authoryear}\ifx\@tempa\@tempb
300     \NAT@numbersfalse\fi
301   \def\@tempb{numbers}\ifx\@tempa\@tempb
302     \NAT@numberstrue\NAT@superfalse\fi
303   \def\@tempb{super}\ifx\@tempa\@tempb
304     \NAT@numberstrue\NAT@supertrue\fi
305   \def\@tempb{nobibstyle}\ifx\@tempa\@tempb
306     \let\bibstyle=\@gobble\fi
307   \def\@tempb{bibstyle}\ifx\@tempa\@tempb
308     \let\bibstyle=\@citestyle\fi
309   \def\@tempb{sort}\ifx\@tempa\@tempb
310     \def\NAT@sort{\@ne}\fi
311   \def\@tempb{nosort}\ifx\@tempa\@tempb
312     \def\NAT@sort{\z@}\fi
313   \def\@tempb{compress}\ifx\@tempa\@tempb
314     \def\NAT@cmprs{\@ne}\fi
315   \def\@tempb{nocompress}\ifx\@tempa\@tempb
316     \def\NAT@cmprs{\z@}\fi
317   \def\@tempb{sort&compress}\ifx\@tempa\@tempb
318     \def\NAT@sort{\@ne}\def\NAT@cmprs{\@ne}\fi
319   \def\@tempb{mcite}\ifx\@tempa\@tempb
320     \let\NAT@merge\@ne\fi
321   \def\@tempb{merge}\ifx\@tempa\@tempb
322     \@ifnum{\NAT@merge<\tw@}{\let\NAT@merge\tw@}{\fi
323   \def\@tempb{elide}\ifx\@tempa\@tempb
324     \@ifnum{\NAT@merge<\thr@}{\let\NAT@merge\thr@}{\fi
325   \def\@tempb{longnamesfirst}\ifx\@tempa\@tempb
326     \NAT@longnamestrue\fi
327   \def\@tempb{nonamebreak}\ifx\@tempa\@tempb
328     \def\NAT@nmfmt#1{\mbox{\NAT@up#1}}\fi
329   \expandafter\NAT@find@eq\@tempa=\relax\@nil
330   \if\@tempc\relax\else
331     \expandafter\NAT@rem@eq\@tempc
332     \def\@tempb{open}\ifx\@tempa\@tempb
333       \xdef\NAT@open{\@tempc}\fi
334     \def\@tempb{close}\ifx\@tempa\@tempb
335       \xdef\NAT@close{\@tempc}\fi
336     \def\@tempb{aysep}\ifx\@tempa\@tempb
337       \xdef\NAT@aysep{\@tempc}\fi

```

```

338     \def\@tempb{yysep}\ifx\@tempa\@tempb
339     \xdef\NAT@yrsep{\@tempc}\fi
340     \def\@tempb{notesep}\ifx\@tempa\@tempb
341     \xdef\NAT@cmt{\@tempc}\fi
342     \def\@tempb{citesep}\ifx\@tempa\@tempb
343     \xdef\NAT@sep{\@tempc}\fi
344   \fi
345 }%
346 \NAT@setcites
347 }
348 \renewcommand\citestyle[1]{%
349   \ifcsname bibstyle@#1\endcsname%
350   \csname bibstyle@#1\endcsname\let\bibstyle\gobble%
351   \else%
352   \@latex@error{Undefined ‘#1’ citestyle}%
353   \fi
354 }%
355 \fi

```

`\bibstyle@acmauthoryear` The default author-year format:

```

356 \newcommand{\bibstyle@acmauthoryear}{%
357   \setcitestyle{%
358     authoryear,%
359     open={},close={},citesep={;},%
360     aysep={},yysep={},,%
361     notesep={, }}

```

`\bibstyle@acmnumeric` The default numeric format:

```

362 \newcommand{\bibstyle@acmnumeric}{%
363   \setcitestyle{%
364     numbers,sort&compress,%
365     open={},close={},citesep={,},%
366     notesep={, }}

```

The default is numeric:

```

367 \if@ACM@natbib
368 \citestyle{acmnumeric}
369 \fi

```

### 3.7 Internationalization

```

370 \if@ACM@journal
371   \renewcommand\keywordsname{Additional Key Words and Phrases}%
372 \else
373   \renewcommand\keywordsname{Keywords}%
374 \fi
375 \if@ACM@engage
376   \renewcommand\abstractname{Synopsis}%
377 \fi
378 \ifx\ACM@languages\empty
379 \else
380   \RequirePackage[\ACM@languages]{babel}%
381   \addto\captionsenglish{%
382     \if@ACM@journal

```

```

383     \renewcommand\keywordsname{Additional Key Words and Phrases}%
384   \else
385     \renewcommand\keywordsname{Keywords}%
386   \fi
387   \renewcommand\acksname{Acknowledgements}%
388   \if@ACM@engage
389     \renewcommand\abstractname{Synopsis}%
390   \fi
391 }%
392 \addto\captionsfrench{%
393   \if@ACM@journal
394     \renewcommand\keywordsname{Mots Clés et Phrases Supplémentaires}%
395   \else
396     \renewcommand\keywordsname{Mots clés}%
397   \fi
398   \renewcommand\acksname{Remerciements}%
399 }%
400 \addto\captionsgerman{%
401   \if@ACM@journal
402     \renewcommand\keywordsname{Zusätzliche Schlagwörter und Phrasen}%
403   \else
404     \renewcommand\keywordsname{Schlagwörter}%
405   \fi
406   \renewcommand\acksname{Danksagungen}%
407 }%
408 \addto\captionsspanish{%
409   \if@ACM@journal
410     \renewcommand\keywordsname{Palabras y Frases Claves Adicionales}%
411   \else
412     \renewcommand\keywordsname{Palabras claves}%
413   \fi
414   \renewcommand\acksname{Expresiones de gratitud}%
415 }%
416 \fi

```

\ACM@lang@check Some commands should not be used if the document is monlingual

```

417 \newcommand\ACM@lang@check[1]{%
418   \ifx\ACM@languages\@empty\relax
419     \ClassError{\@classname}{%
420       Command \string#1 \MessageBreak is used in monlingual document}{%
421         You used a command (\string#1) \MessageBreak
422         that does not have a meaning \MessageBreak
423         unless are languages are defined. \MessageBreak
424         Please choose the languages in \string\documentclass
425         \MessageBreak
426         (e.g. \string\documentclass[languages={french, english}]{acmart}),
427         \MessageBreak
428         or delete the command.}%
429   \fi}

```

\@translatedtitle

```

430 \def\@translatedtitle{}

```

\translatedtitle The title of the paper in a different language

```

431 \newcommand\translatedtitle[2]{\ACM@lang@check{\translatedtitle}%
432 \g@addto@macro\@translatedtitle{\par\foreignlanguage{#1}{#2}}}

\@translatedsubtitle

433 \def\@translatedsubtitle{}

\translatedsubtitle The subtitle of the paper in a different language
434 \newcommand\translatedsubtitle[2]{\ACM@lang@check{\translatedsubtitle}%
435 \g@addto@macro\@translatedsubtitle{\par\foreignlanguage{#1}{#2}}}

\@translatedkeywords

436 \def\@translatedkeywords{}

\translatedkeywords Add keywords to the paper in the language specified
437 \newcommand\translatedkeywords[2]{\ACM@lang@check{\translatedkeywords}%
438 \g@addto@macro\@translatedkeywords{\@mktranslatedkeywords{#1}{#2}}}

\@translatedabstracts The container for translated abstracts.
439 \def\@translatedabstracts{}

translatedabstract We save translated abstracts into \@translatedabstracts
440 \newenvironment{translatedabstract}[1]{\Collect@Body
441 \@savetranslatedabstract\@mktranslatedabstract{#1}}{}

\@savetranslatedabstract And saving the abstract
442 \long\def\@savetranslatedabstract#1{\if@ACM@maketitle@typeset
443 \ClassError{\@classname}{Abstract must be defined before maketitle
444 command. Please move it!}\fi
445 \ACM@lang@check{translatedabstract}%
446 \g@addto@macro\@translatedabstracts{\bgroup#1\egroup}}

```

### 3.8 Sectioning

\@startsection Before we call hyperref, we redefine \@startsection commands to their L<sup>A</sup>T<sub>E</sub>X defaults since the amsart ones are too AMS-specific. We need to do this early since we want hyperref to have a chance to redefine them again:

```

447 \def\@startsection#1#2#3#4#5#6{%
448 \if@noskipsec \leavevmode \fi
449 \par
450 \@tempskipa #4\relax
451 \@afterindenttrue
452 \ifdim \@tempskipa <\z@
453 \@tempskipa -\@tempskipa \@afterindentfalse
454 \fi
455 \if@nobreak
456 \everypar{}%
457 \else
458 \addpenalty\@secpenalty\addvspace\@tempskipa
459 \fi
460 \@ifstar
461 {\@ssect{#3}{#4}{#5}{#6}}%
462 {\@dblarg{\@sect{#1}{#2}{#3}{#4}{#5}{#6}}}

```

```

463 \def\@sect#1#2#3#4#5#6[#7]#8{%
464   \edef\@toclevel{\ifnum#2=\@m 0\else\number#2\fi}%
465   \ifnum #2>\c@secnumdepth
466     \let\@svsec\@empty
467   \else
468     \refstepcounter{#1}%
469     \protected@edef\@svsec{\@seccntformat{#1}\relax}%
470   \fi
471   \@tempskipa #5\relax
472   \ifdim \@tempskipa>\z@
473     \begingroup
474       #6{%
475         \@hangfrom{\hskip #3\relax\@svsec}%
476         \interlinepenalty \@M #8\@par}%
477     \endgroup
478     \csname #1mark\endcsname{#7}%
479     \ifnum #2>\c@secnumdepth \else
480       \@tochangmeasure{\csname the#1\endcsname}%
481     \fi
482     \addcontentsline{toc}{#1}{%
483       \ifnum #2>\c@secnumdepth \else
484         \protect\numberline{\csname the#1\endcsname}%
485       \fi
486       #7}%
487   \else
488     \def\@svsechd{%
489       #6{\hskip #3\relax
490         \@svsec #8}%
491       \csname #1mark\endcsname{#7}%
492       \ifnum #2>\c@secnumdepth \else
493         \@tochangmeasure{\csname the#1\endcsname\space}%
494       \fi
495       \addcontentsline{toc}{#1}{%
496         \ifnum #2>\c@secnumdepth \else
497           \protect\numberline{\csname the#1\endcsname}%
498         \fi
499         #7}}%
500   \fi
501   \@xsect{#5}}
502 \def\@xsect#1{%
503   \@tempskipa #1\relax
504   \ifdim \@tempskipa>\z@
505     \par \nobreak
506     \vskip \@tempskipa
507     \afterheading
508   \else
509     \@nbreakfalse
510     \global\@noskipsecttrue
511     \everypar{%
512       \if@noskipsec
513         \global\@noskipsecfalse
514         {\setbox\z@\lastbox}%
515         \clubpenalty\@M
516         \begingroup \@svsechd \endgroup

```

```

517     \unskip
518     \@tempskipa #1\relax
519     \hskip -\@tempskipa
520   \else
521     \clubpenalty \@clubpenalty
522     \everypar{}%
523   \fi}%
524 \fi
525 \ignorespaces}
526 \def\@secntformat#1{\csname the#1\endcsname\quad}
527 \def\@ssect#1#2#3#4#5{%
528   \@tempskipa #3\relax
529   \ifdim \@tempskipa>\z@
530     \begingroup
531     #4{%
532       \@hangfrom{\hskip #1}%
533       \interlinepenalty \@M #5\@par}%
534   \endgroup
535 \else
536   \def\@svsechd{#4{\hskip #1\relax #5}}%
537 \fi
538 \@xsect{#3}}

```

\@startsection The amsart package redefines \@startsection. Here we redefine it again to make the table of contents work.

```

539 \def\@starttoc#1#2{\begingroup\makeatletter
540   \setTrue{#1}%
541   \par\removelastskip\vskip\z@skip
542   \@startsection{section}\@M\z@{\linespacing\@plus\linespacing}%
543   {.5\linespacing}{\centering\contentsnamefont}{#2}%
544   \@input{\jobname.#1}%
545   \if@filesw
546     \xp\newwrite\csname tf@#1\endcsname
547     \immediate\xp\openout\csname tf@#1\endcsname \jobname.#1\relax
548   \fi
549   \global\@nobeckfalse \endgroup
550   \addvspace{32\p@\@plus14\p@}%
551 }

```

\l@section Section spacing is more generous than for amsart

```

552 \def\l@section{\@tocline{1}{0pt}{1pc}{2pc}{}}

```

\l@subsection The spacing in amsart is too large

```

553 \def\l@subsection{\@tocline{2}{0pt}{1pc}{3pc}{}}

```

\l@subsubsection The spacing in amsart is too large

```

554 \def\l@subsubsection{\@tocline{3}{0pt}{1pc}{5pc}{}}

```

We need to define footnote-related stuff before the call to hyperref (Ross Moore)

\@makefnctext We do not use indentation for footnotes

```

555 \def\@makefnctext{\noindent\@makefnmark}

```

\@footnotetext In sigchi-a mode our footnotes are in the margin!

```
556 \if@ACM@sigchiamode
557 \long\def\@footnotetext#1{\marginpar{%
558   \reset@font\small
559   \interlinepenalty\interfootnotelinepenalty
560   \protected@edef\@currentlabel{%
561     \csname p@footnote\endcsname\@thefnmark
562   }%
563   \color@begingroup
564     \@makefnmark{%
565       \rule{z@footnotesep}{\ignorespaces#1\@finalstrut\strutbox}%
566     \color@endgroup}}%
567 \fi
```

\@mpfootnotetext We want the footnotes in minipages centered:

```
568 \long\def\@mpfootnotetext#1{%
569   \global\setbox\@mpfootins\vbox{%
570     \unvbox\@mpfootins
571     \reset@font\footnotesize
572     \hsize\columnwidth
573     \@parboxrestore
574     \protected@edef\@currentlabel
575       {\csname p@mpfootnote\endcsname\@thefnmark}%
576     \color@begingroup\centering
577       \@makefnmark{%
578         \rule{z@footnotesep}{\ignorespaces#1\@finalstrut\strutbox}%
579       \color@endgroup}}%
```

\@makefnmark AMS classes use a buggy definition of \@makefnmark. We revert to the standard one.

```
580 \def\@makefnmark{\hbox{\@textsuperscript{\normalfont\@thefnmark}}}
```

### 3.9 Hyperxmp and hyperref

Adding hyperxmp

```
581 \RequirePackage{hyperxmp}
```

And now, hyperref

```
582 \let\@footnotemark@nolink\@footnotemark
583 \let\@footnotetext@nolink\@footnotetext
584 \RequirePackage[bookmarksnumbered,unicode]{hyperref}
585 \pdfstringdefDisableCommands{%
586   \def\addtocounter#1#2{%
587     \def\unskip{}}%
588   \def\textbullet{- }%
589   \def\textrightarrow{-> }%
590   \def\footnotemark{}}%
591 }
592 \urlstyle{rm}
593 \ifcase\ACM@format@nr
594 \relax % manuscript
595 \or % acmsmall
596 \or % acmlarge
597 \or % acmtog
598 \or % sigconf
```

```

599 \or % siggraph
600 \or % sigplan
601 \urlstyle{sf}
602 \or % sigchi
603 \or % sigchi-a
604 \urlstyle{sf}
605 \or % acmengage
606 \or % acmcp
607 \fi
608 \AtEndPreamble{%
609 \if@ACM@urlbreakonhyphens
610 \def\do@url@hyp{\do\~}%
611 \fi
612 \if@ACM@screen
613 \hypersetup{colorlinks,
614 linkcolor=ACMPurple,
615 citecolor=ACMPurple,
616 urlcolor=ACMDarkBlue,
617 filecolor=ACMDarkBlue}
618 \else
619 \hypersetup{hidelinks}
620 \fi
621 \hypersetup{pdflang={en},
622 pdfdisplaydoctitle}}
    Bibliography mangling.
623 \if@ACM@natbib
624 \let\citeN\cite
625 \let\cite\citep
626 \let\citeANP\citeauthor
627 \let\citeNN\citeyearpar
628 \let\citeyearNP\citeyear
629 \let\citeNP\citealt
630 \DeclareRobustCommand\citeA
631 {\begingroup\NAT@swafalse
632 \let\NAT@ctype\@ne\NAT@partrue\NAT@fullfalse\NAT@open\NAT@citetp}%
633 \providecommand\newblock{}%
634 \else
635 \AtBeginDocument{%
636 \let\shortcite\cite%
637 \providecommand\citename[1]{#1}}
638 \fi
639 \newcommand\shortcite[2][]{%
640 \ifNAT@numbers\cite[#1]{#2}\else\citeyearpar[#1]{#2}\fi}

```

`\bibliographystyle` The `amsart` package redefines `\bibliographystyle` since it prefers the AMS bibliography style. We turn it back to the  $\text{\LaTeX}$  definition:

```

641 \def\bibliographystyle#1{%
642 \ifx\@begindocumenthook\@undefined\else
643 \expandafter\AtBeginDocument
644 \fi
645 {\if@filesw
646 \immediate\write\@auxout{\string\bibstyle{#1}}%
647 \fi}}

```

### 3.10 Other packages

Graphics and color.

```
648 \RequirePackage{graphicx}
649 \RequirePackage[prologue]{xcolor}
```

We define ACM colors according to [8]:

```
650 \definecolor[named]{ACMBlue}{cmyk}{1,0.1,0,0.1}
651 \definecolor[named]{ACMYellow}{cmyk}{0,0.16,1,0}
652 \definecolor[named]{ACMOrange}{cmyk}{0,0.42,1,0.01}
653 \definecolor[named]{ACMRed}{cmyk}{0,0.90,0.86,0}
654 \definecolor[named]{ACMLightBlue}{cmyk}{0.49,0.01,0,0}
655 \definecolor[named]{ACMGreen}{cmyk}{0.20,0,1,0.19}
656 \definecolor[named]{ACMPurple}{cmyk}{0.55,1,0,0.15}
657 \definecolor[named]{ACMDarkBlue}{cmyk}{1,0.58,0,0.21}
```

Author-draft mode or sigchi-a mode

```
658 \if@ACM@authordraft
659   \RequirePackage{draftwatermark}
660   \SetWatermarkFontSize{0.5in}
661   \SetWatermarkColor[gray]{.9}
662   \SetWatermarkText{\parbox{12em}{\centering
663     Unpublished working draft.\\
664     Not for distribution.}}
665 \else
666   \if@ACM@sigchi-mode
667     \if@ACM@nonacm\else
668       \RequirePackage{draftwatermark}
669       \SetWatermarkFontSize{0.5in}
670       \SetWatermarkColor[gray]{.9}
671       \SetWatermarkText{\parbox{12em}{\centering
672         Legacy document. \\
673         Not for publication in an ACM venue}}
674     \fi
675   \fi
676 \fi
```

### 3.11 Paper size and paragraphing

We use geometry for dimensions. Note that the present margins do not depend on the font size option—we might need to change this. See <https://github.com/borisveytsman/acmart/issues/5#issuecomment-272881329>.

```
677 \RequirePackage{geometry}
678 \ifcase\ACM@format@nr
679 \relax % manuscript
680   \geometry{letterpaper,head=13pt,
681     marginparwidth=6pc,heightrounded}%
682 \or % acmsmall
683   \geometry{twoside=true,
684     includeheadfoot, head=13pt, foot=2pc,
685     paperwidth=6.75in, paperheight=10in,
686     top=58pt, bottom=44pt, inner=46pt, outer=46pt,
687     marginparwidth=2pc,heightrounded
688   }%
```

```

689 \or % acmlarge
690   \geometry{twoside=true, head=13pt, foot=2pc,
691     paperwidth=8.5in, paperheight=11in,
692     includeheadfoot,
693     top=78pt, bottom=114pt, inner=81pt, outer=81pt,
694     marginparwidth=4pc,heightrounded
695   }%
696 \or % acmtog
697   \geometry{twoside=true, head=13pt, foot=2pc,
698     paperwidth=8.5in, paperheight=11in,
699     includeheadfoot, columnsep=24pt,
700     top=52pt, bottom=75pt, inner=52pt, outer=52pt,
701     marginparwidth=2pc,heightrounded
702   }%
703 \or % sigconf
704   \geometry{twoside=true, head=13pt,
705     paperwidth=8.5in, paperheight=11in,
706     includeheadfoot, columnsep=2pc,
707     top=57pt, bottom=73pt, inner=54pt, outer=54pt,
708     marginparwidth=2pc,heightrounded
709   }%
710 \or % siggraph
711   \geometry{twoside=true, head=13pt,
712     paperwidth=8.5in, paperheight=11in,
713     includeheadfoot, columnsep=2pc,
714     top=57pt, bottom=73pt, inner=54pt, outer=54pt,
715     marginparwidth=2pc,heightrounded
716   }%
717 \or % sigplan
718   \geometry{twoside=true, head=13pt,
719     paperwidth=8.5in, paperheight=11in,
720     includeheadfoot=false, columnsep=2pc,
721     top=1in, bottom=1in, inner=0.75in, outer=0.75in,
722     marginparwidth=2pc,heightrounded
723   }%
724 \or % sigchi
725   \geometry{twoside=true, head=13pt,
726     paperwidth=8.5in, paperheight=11in,
727     includeheadfoot, columnsep=2pc,
728     top=66pt, bottom=73pt, inner=54pt, outer=54pt,
729     marginparwidth=2pc,heightrounded
730   }%
731 \or % sigchi-a
732   \geometry{twoside=false, head=13pt,
733     paperwidth=11in, paperheight=8.5in,
734     includeheadfoot, marginparsep=72pt,
735     marginparwidth=170pt, columnsep=20pt,
736     top=72pt, bottom=72pt, left=314pt, right=72pt
737   }%
738   \@mparswitchfalse
739   \reversemarginpar
740 \or % acmengage
741   \geometry{twoside=true, head=13pt,
742     paperwidth=8.5in, paperheight=11in,

```

```

743     includeheadfoot, columnsep=2pc,
744     top=57pt, bottom=73pt, inner=54pt, outer=54pt,
745     marginparwidth=2pc,heightrounded
746   }%
747 \or % acmcp
748   \geometry{twoside=true,
749     includeheadfoot, head=13pt, foot=2pc,
750     paperwidth=6.75in, paperheight=10in,
751     top=58pt, bottom=44pt, inner=46pt, outer=46pt,
752     marginparwidth=2pc,heightrounded
753   }%
754 \fi

```

`\parindent` Paragraphing

```

\parskip 755 \setlength\parindent{10\p@}
756 \setlength\parskip{\z@}
757 \ifcase\ACM@format@nr
758 \relax % manuscript
759 \or % acmsmall
760 \or % acmlarge
761 \or % acmtog
762   \setlength\parindent{9\p@}%
763 \or % sigconf
764 \or % siggraph
765 \or % sigplan
766 \or % sigchi
767 \or % sigchi-a
768 \or % acmengage
769 \or % acmcp
770 \fi

```

`\normalparindent` The `amsart` package defines the `\normalparindent` length and initializes it to 12pt (the value of `\parindent` in `amsart`). It is later used to set the `\listparindent` length in the quotation environment and the `\parindent` length in the `\@footnotetext` command. We set `\normalparindent` to the value of `\parindent` as selected by `acmart` for consistent paragraph indents.

```
771 \setlength\normalparindent{\parindent}
```

Footnotes require some consideration. We have several layers of footnotes: front-matter footnotes, “regular” footnotes and the special insert for the bibstrip. In the old ACM classes, the bibstrip was a `\@float`. The problem with floats is that they tend to, well, float—and we want the guarantee they stay.

We use `manyfoot` for layered footnotes instead.

`copyrightpermissionfootnoterule` This is the footnote rule that separates the bibstrip from the rest of the paper. It is a full width rule.

```

772 \def\copyrightpermissionfootnoterule{\kern-3\p@
773   \hrule \@width \columnwidth \kern 2.6\p@}

774 \RequirePackage{manyfoot}
775 \SelectFootnoteRule[2]{copyrightpermission}
776 \DeclareNewFootnote{authorsaddresses}
777 \SelectFootnoteRule[2]{copyrightpermission}
778 \DeclareNewFootnote{copyrightpermission}

```

`\footnoterule` Tschichold's rules:

```
779 \def\footnoterule{\kern-3\p@
780 \hrule \@width 4pc \kern 2.6\p@}
```

`\endminipage` We do not use footnote rules in minipages

```
781 \def\endminipage{%
782   \par
783   \unskip
784   \ifvoid\@mpfootins\else
785     \vskip\skip\@mpfootins
786     \normalcolor
787     \unvbox\@mpfootins
788   \fi
789   \@minipagefalse
790   \color@endgroup
791   \egroup
792   \expandafter\@iiparbox\@mpargs{\unvbox\@tempboxa}}
```

`\@textbottom` Add some stretch according to David Carlisle's advice at <http://tex.stackexchange.com/a/62318/5522>

```
793 \def\@textbottom{\vskip \z@ \@plus 1pt}
794 \let\@texttop\relax
```

In two-column layouts, force both columns to be the same height by inserting extra internal vertical space to fill out the page.

```
795 \ifcase\ACM@format@nr
796 \relax % manuscript
797 \or % acmsmall
798 \or % acmlarge
799 \or % acmtog
800 \flushbottom
801 \or % sigconf
802 \flushbottom
803 \or % siggraph
804 \flushbottom
805 \or % sigplan
806 \flushbottom
807 \or % sigchi
808 \flushbottom
809 \or % sigchi-a
810 \or % acmengage
811 \flushbottom
812 \or % acmcp
813 \flushbottom
814 \fi
```

### 3.12 Fonts

Somehow PDF<sub>T</sub>EX and Xe<sub>T</sub>EX require different incantations to make a PDF compliant with the current Acrobat bugs. Xpdf is much better.

The code below is by Ross Moore.

```
815 \ifPDFTeX
816 \input{glyhtounicode}
```

```

817 \pdfglyphtounicode{f_f}{FB00}
818 \pdfglyphtounicode{f_f_i}{FB03}
819 \pdfglyphtounicode{f_f_l}{FB04}
820 \pdfglyphtounicode{f_i}{FB01}
821 \pdfglyphtounicode{t_t}{0074 0074}
822 \pdfglyphtounicode{f_t}{0066 0074}
823 \pdfglyphtounicode{T_h}{0054 0068}
824 \pdfgentounicode=1
825 \RequirePackage{cmap}
826 \fi

```

\if@ACM@newfonts Whether we load the new fonts

```

827 \newif\if@ACM@newfonts
828 \@ACM@newfontstrue
829 \IfFileExists{libertine.sty}{\ClassWarning{\@classname}{You do not
830   have the libertine package installed. Please upgrade your
831   TeX}\@ACM@newfontsfalse}
832 \IfFileExists{zi4.sty}{\ClassWarning{\@classname}{You do not
833   have the inconsolata (zi4.sty) package installed. Please upgrade your
834   TeX}\@ACM@newfontsfalse}
835 \IfFileExists{newtxmath.sty}{\ClassWarning{\@classname}{You do not
836   have the newtxmath package installed. Please upgrade your
837   TeX}\@ACM@newfontsfalse}

```

We use Libertine throughout.

```

838 \if@ACM@newfonts
839   \RequirePackage[T1]{fontenc}
840   % Note that the order in which packages are loaded matters,
841   % and the correct order depends on the LaTeX engine used.
842   % See https://github.com/borisveytsman/acmart/issues/402
843   % and https://github.com/borisveytsman/acmart/issues/410
844   \ifxetex
845     \RequirePackage[libertine]{newtxmath}
846     \RequirePackage[tt=false]{libertine}
847     \setmonofont[StylisticSet=3]{inconsolata}
848   \else
849     \ifluatex
850       \RequirePackage[libertine]{newtxmath}
851       \RequirePackage[tt=false]{libertine}
852       \setmonofont[StylisticSet=3]{inconsolata}
853     \else
854       \RequirePackage[tt=false, type1=true]{libertine}
855       \RequirePackage[varqu]{zi4}
856       \RequirePackage[libertine]{newtxmath}
857     \fi
858   \fi
859 \fi

```

\liningnums Libertine defines \liningnums, which makes fontspec unhappy. While we do not use fontspec, some users do.

```

860 \let\liningnums\@undefined
861 \AtEndPreamble{%
862   \DeclareTextFontCommand{\liningnums}{\libertineLF}}

```

The SIGCHI extended abstracts are sans serif:

```
863 \if@ACM@sigchiamode
864   \renewcommand{\familydefault}{\sfdefault}
865 \fi
```

### 3.13 Image descriptions

`\if@Description@present` A local switch: whether there is a description in the given figure

```
866 \newif\if@Description@present
867 \@Description@presenttrue
```

`\if@undescribed@images` A global switch whether some images were *not* described

```
868 \newif\if@undescribed@images
869 \@undescribed@imagesfalse
```

`\Description` The Description macro right now just sets switches

```
870 \newcommand\Description[2][\global\@Description@presenttrue\ignorespaces]
```

The global warning

```
871 \AtEndDocument{\if@undescribed@images
872   \ClassWarningNoLine{\@classname}{Some images may lack descriptions}\fi}
```

Hooks for figures and tables. We also patch algorithm and algorithm\* in case somebody uses them.

```
873 \AtBeginEnvironment{figure}{\@Description@presentfalse
874   \let\@vspace\@vspace@orig
875   \let\@vspacer\@vspacer@orig}
876 \AtBeginEnvironment{figure*}{\@Description@presentfalse
877   \let\@vspace\@vspace@orig
878   \let\@vspacer\@vspacer@orig}
879 \AtEndEnvironment{figure}{\if@Description@present\else
880   \global\@undescribed@imagestrue
881   \ClassWarning{\@classname}{A possible image without description}\fi}
882 \AtEndEnvironment{figure*}{\if@Description@present\else
883   \global\@undescribed@imagestrue
884   \ClassWarning{\@classname}{A possible image without description}\fi}
885 \AtBeginEnvironment{table}{\let\@vspace\@vspace@orig
886   \let\@vspacer\@vspacer@orig}
887 \AtBeginEnvironment{table*}{\let\@vspace\@vspace@orig
888   \let\@vspacer\@vspacer@orig}
889 \AtBeginEnvironment{algorithm}{\let\@vspace\@vspace@orig
890   \let\@vspacer\@vspacer@orig}
891 \AtBeginEnvironment{algorithm*}{\let\@vspace\@vspace@orig
892   \let\@vspacer\@vspacer@orig}
893 \AtBeginEnvironment{lstlisting}{\let\@vspace\@vspace@orig
894   \let\@vspacer\@vspacer@orig}
895 \AtBeginEnvironment{lstlisting*}{\let\@vspace\@vspace@orig
896   \let\@vspacer\@vspacer@orig}
897 \AtBeginEnvironment{minted}{\let\@vspace\@vspace@orig
898   \let\@vspacer\@vspacer@orig}
899 \AtBeginEnvironment{minted*}{\let\@vspace\@vspace@orig
900   \let\@vspacer\@vspacer@orig}
901 \AtBeginEnvironment{listing}{\let\@vspace\@vspace@orig
```

```

902 \let\@vspacer\@vspacer@orig}
903 \AtBeginEnvironment{listing*}{\let\@vspace\@vspace@orig
904 \let\@vspacer\@vspacer@orig}
905

```

### 3.14 Floats

We use the caption package

```

906 \RequirePackage{caption, float}
907 \captionsetup[table]{position=top}
908 \if@ACM@journal
909   \captionsetup{labelfont={sf, small},
910     textfont={sf, small}, margin=\z@}
911   \captionsetup[figure]{name={Fig.}}
912 \else
913   \captionsetup{labelfont={bf},
914     textfont={bf}, labelsep=colon, margin=\z@}
915   \ifcase\ACM@format@nr
916     \relax % manuscript
917     \or % acmsmall
918     \or % acmlarge
919     \or % acmtog
920     \or % sigconf
921     \or % siggraph
922     \captionsetup{textfont={it}}
923     \or % sigplan
924     \captionsetup{labelfont={bf},
925       textfont={normalfont}, labelsep=period, margin=\z@}
926     \or % sigchi
927       \captionsetup[figure]{labelfont={bf, small},
928         textfont={bf, small}}
929       \captionsetup[table]{labelfont={bf, small},
930         textfont={bf, small}}
931     \or % sigchi-a
932       \captionsetup[figure]{labelfont={bf, small},
933         textfont={bf, small}}
934       \captionsetup[table]{labelfont={bf, small},
935         textfont={bf, small}}
936     \or % acmengage
937     \or % acmcp
938     \fi
939 \fi

```

sidebar The sidebar environment:

```

940 \newfloat{sidebar}{}{sbar}
941 \floatname{sidebar}{Sidebar}
942 \renewenvironment{sidebar}{}{\Collect@Body\@sidebar}{}

```

\@sidebar The processing of the saved text

```

943 \long\def\@sidebar#1{\bgroup\let\@vspace\@vspace@orig
944 \let\@vspacer\@vspacer@orig\captionsetup{type=sidebar}%
945 \marginpar{\small#1}\egroup}

```

marginfigure The marginfigure environment:

```
946 \newenvironment{marginfigure}{\Collect@Body\@marginfigure}{}
```

\@marginfigure The processing of the saved text

```
947 \long\def\@marginfigure#1{\bgroup
948   \let\@vspace\@vspace@orig
949   \let\@vspacer\@vspacer@orig
950   \captionsetup{type=figure}%
951   \marginpar{\@Description@presentfalse\centering
952     \small#1\if@Description@present\else
953       \global\@undescrbed@imagestrue
954       \ClassWarning{\@classname}{A possible image without description}
955       \fi}%
956   \egroup}
```

marginfigure The marginfigure environment:

```
957 \newenvironment{marginfigure}{\Collect@Body\@marginfigure}{}
```

\@marginfigure The processing of the saved text

```
958 \long\def\@marginfigure#1{\bgroup\let\@vspace\@vspace@orig
959   \let\@vspacer\@vspacer@orig\captionsetup{type=table}%
960   \marginpar{\centering\small#1}\egroup}
```

SIGCHI extended abstracts provide an interesting possibility to push into the margin. Here we use figure\* and table\* for this.

\fulltextwidth We define the width of the boxes as

```
961 \newdimen\fulltextwidth
962 \fulltextwidth=\dimexpr(\textwidth+\marginparwidth+\marginparsep)
```

\@dblfloat We redefine the double-float command. First, we make the size bigger. Second, our default position is going to be tp (to give marginalia a chance)

```
963 \if@ACM@sigchiamode
964 \def\@dblfloat{\bgroup\let\@vspace\@vspace@orig
965   \let\@vspacer\@vspacer@orig\columnwidth=\fulltextwidth
966   \let\@endfloatbox\@endwidefloatbox
967   \def\@fpsadddefault{\def\@fps{tp}}%
968   \@float}
969 \fi
```

\enddblfloat And the end. Just adding a \bgroup.

```
970 \if@ACM@sigchiamode
971 \def\enddblfloat{%
972   \endfloat\egroup}
973 \fi
```

\@endwidefloatbox This is the end of a wide box—we basically move everything to the left

```
974 \def\@endwidefloatbox{%
975   \par\vskip\z@skip
976   \@minipagefalse
977   \outer@nobreak
978   \egroup
979   \color@endbox}
```

```

980 \global\setbox\@currbox=\vbox{\moveleft
981   \dimexpr(\fulltextwidth-\textwidth)\box\@currbox}%
982   \wd\@currbox=\textwidth
983 }

```

### 3.15 Lists

```

984 \ifcase\ACM@format@nr
985 \relax % manuscript
986 \or % acmsmall
987 \or % acmlarge
988 \or % acmtog
989 \or % sigconf
990 \or % siggraph
991 \or % sigplan
992 \def\labelenumi{\theenumi.}
993 \def\labelenumii{\theenumii.}
994 \def\labelenumiii{\theenumiii.}
995 \def\labelenumiv{\theenumiv.}
996 \or % sigchi
997 \or % sigchi-a
998 \or % acmengage
999 \or % acmcp
1000 \fi

```

The AMS uses generous margins for lists. Note that `amsart` defines `\leftmargin` values for list levels at the beginning of the document, so we must redefine them in the same manner. Also, note that `amsart` redefines the `enumerate` and `itemize` environments with a `\makelabel` command that uses `\llap`, so the `\labelwidth` value is (effectively) irrelevant; nonetheless, we follow `amsart` and set `\labelwidth` to `\leftmargin` minus `\labelsep`.

```

1001 \newdimen\@ACM@labelwidth
1002 \AtBeginDocument{%
1003   \setlength\labelsep{4pt}
1004   \setlength{\@ACM@labelwidth}{6.5pt}
1005
1006   %% First-level list: when beginning after the first line of an
1007   %% indented paragraph or ending before an indented paragraph, labels
1008   %% should not hang to the left of the preceding/following text.
1009   \setlength\leftmargini{\z@}
1010   \addtolength\leftmargini{\parindent}
1011   \addtolength\leftmargini{2\labelsep}
1012   \addtolength\leftmargini{\@ACM@labelwidth}
1013
1014   %% Second-level and higher lists.
1015   \setlength\leftmarginii{\z@}
1016   \addtolength\leftmarginii{0.5\labelsep}
1017   \addtolength\leftmarginii{\@ACM@labelwidth}
1018   \setlength\leftmarginiii{\leftmarginii}
1019   \setlength\leftmarginiv{\leftmarginiii}
1020   \setlength\leftmarginv{\leftmarginiv}
1021   \setlength\leftmarginvi{\leftmarginv}
1022   \@listi}
1023 \newskip\listisep

```

```

1024 \listisep\smallskipamount
1025 \def\@listI{\leftmargin\leftmarginI
1026 \labelwidth\leftmarginI \advance\labelwidth-\labelsep
1027 \listparindent\z@
1028 \topsep\listisep}
1029 \let\@listi\@listI
1030 \def\@listii{\leftmargin\leftmarginii
1031 \labelwidth\leftmarginii \advance\labelwidth-\labelsep
1032 \topsep\z@skip}
1033 \def\@listiii{\leftmargin\leftmarginiii
1034 \labelwidth\leftmarginiii \advance\labelwidth-\labelsep}
1035 \def\@listiv{\leftmargin\leftmarginiv
1036 \labelwidth\leftmarginiv \advance\labelwidth-\labelsep}
1037 \def\@listv{\leftmargin\leftmarginv
1038 \labelwidth\leftmarginv \advance\labelwidth-\labelsep}
1039 \def\@listvi{\leftmargin\leftmarginvi
1040 \labelwidth\leftmarginvi \advance\labelwidth-\labelsep}
\descriptionlabel We do not use a colon by default like amsart does:
1041 \renewcommand{\descriptionlabel}[1]{\upshape\bfseries #1}

\description Make the description environment indentation consistent with that of the itemize
and enumerate environments.
1042 \renewenvironment{description}{\list{}}{%
1043 \labelwidth\@ACM@labelwidth
1044 \let\makelabel\descriptionlabel}%
1045 }{
1046 \endlist
1047 }
1048 \let\enddescription=\endlist % for efficiency

```

### 3.16 Top-matter data

`\if@ACM@maketitle@typeset` The switch to check whether `\maketitle` is already typeset. It is initially false, and setting top matter when it is true is wrong.

```

1049 \newif\if@ACM@maketitle@typeset
1050 \@ACM@maketitle@typesetfalse

```

We use the `xkeyval` interface to define journal titles and the relevant information

```

1051 \define@choicekey*+{ACM}{acmJournal}[\@journalCode\@journalCode@nr]{%
1052 ACMJCSS,%
1053 CIE,%
1054 CSUR,%
1055 DGOV,%
1056 DLT,%
1057 DTRAP,%
1058 FAC,%
1059 GAMES,%
1060 HEALTH,%
1061 IMWUT,%
1062 JACM,%
1063 JATS,%
1064 JDIQ,%
1065 JDS,%

```

1066 JEA,%  
1067 JERIC,%  
1068 JETC,%  
1069 JOCCH,%  
1070 JRC,%  
1071 PACMCGIT,%  
1072 PACMHCI,%  
1073 PACMNET,%  
1074 PACMPL,%  
1075 POMACS,%  
1076 TAAS,%  
1077 TACCESS,%  
1078 TACO,%  
1079 TALG,%  
1080 TALLIP,%  
1081 TAP,%  
1082 TCPS,%  
1083 TDS,%  
1084 TEAC,%  
1085 TECS,%  
1086 TELO,%  
1087 THRI,%  
1088 TIIS,%  
1089 TIOT,%  
1090 TISSEC,%  
1091 TIST,%  
1092 TKDD,%  
1093 TMIS,%  
1094 TOCE,%  
1095 TOCHI,%  
1096 TOCL,%  
1097 TOCS,%  
1098 TOCT,%  
1099 TODAES,%  
1100 TODS,%  
1101 TOG,%  
1102 TOIS,%  
1103 TOIT,%  
1104 TOMACS,%  
1105 TOMM,%  
1106 TOMPECS,%  
1107 TOMS,%  
1108 TOPC,%  
1109 TOPS,%  
1110 TOPLAS,%  
1111 TORS,%  
1112 TOS,%  
1113 TOSEM,%  
1114 TOSN,%  
1115 TQC,%  
1116 TRETs,%  
1117 TSAS,%  
1118 TSC,%  
1119 TSLP,%

```

1120  TWEB,%
1121  FACMP%
1122 }{%
1123 \ifcase\@journalCode@nr
1124 \relax % ACMJCSS
1125 \def\@journalName{ACM Journal on Computing and Sustainable Societies}%
1126 \def\@journalNameShort{ACM J. Comput. Sustain. Soc.}%
1127 \def\@permissionCodeOne{2834-5533}%
1128 \or % CIE
1129 \def\@journalName{ACM Computers in Entertainment}%
1130 \def\@journalNameShort{ACM Comput. Entertain.}%
1131 \def\@permissionCodeOne{1544-3574}%
1132 \or % CSUR
1133 \def\@journalName{ACM Computing Surveys}%
1134 \def\@journalNameShort{ACM Comput. Surv.}%
1135 \def\@permissionCodeOne{0360-0300}%
1136 \or % DGOV
1137 \def\@journalName{Digital Government: Research and Practice}%
1138 \def\@journalNameShort{Digit. Gov. Res. Pract.}%
1139 \def\@permissionCodeOne{2639-0175}%
1140 \or % DLT
1141 \def\@journalName{Distributed Ledger Technologies: Research and Practice}%
1142 \def\@journalNameShort{Distrib. Ledger Technol.}%
1143 \def\@permissionCodeOne{2769-6472}%
1144 \or % DTRAP
1145 \def\@journalName{Digital Threats: Research and Practice}%
1146 \def\@journalNameShort{Digit. Threat. Res. Pract.}%
1147 \def\@permissionCodeOne{2576-5337}%
1148 \or % FAC
1149 \def\@journalName{Formal Aspects of Computing}%
1150 \def\@journalNameShort{Form. Asp. Comput.}%
1151 \def\@permissionCodeOne{0934-5043}%
1152 \def\@permissionCodeTwo{1433-299X}%
1153 \or % GAMES
1154 \def\@journalName{ACM Games: Research and Practice}%
1155 \def\@journalNameShort{ACM Games}%
1156 \def\@permissionCodeOne{2832-5516}%
1157 \or % HEALTH
1158 \def\@journalName{ACM Transactions on Computing for Healthcare}%
1159 \def\@journalNameShort{ACM Trans. Comput. Healthcare}%
1160 \def\@permissionCodeOne{2637-8051}%
1161 \or % IMWUT
1162 \def\@journalName{Proceedings of the ACM on Interactive, Mobile,
1163 Wearable and Ubiquitous Technologies}%
1164 \def\@journalNameShort{Proc. ACM Interact. Mob. Wearable Ubiquitous Technol.}%
1165 \def\@permissionCodeOne{2474-9567}%
1166 \@ACM@screentruer
1167 \PackageInfo{\@classname}{Using screen mode due to \@journalCode}%
1168 \or % JACM
1169 \def\@journalName{Journal of the ACM}%
1170 \def\@journalNameShort{J. ACM}%
1171 \def\@permissionCodeOne{0004-5411}%
1172 \or % JATS
1173 \def\@journalName{Journal on Autonomous Transportation Systems}%

```

```

1174 \def\@journalNameShort{ACM J. Auton. Transport. Syst.}%
1175 \def\@permissionCodeOne{2833-0528}%
1176 \or % JDIQ
1177 \def\@journalName{ACM Journal of Data and Information Quality}%
1178 \def\@journalNameShort{ACM J. Data Inform. Quality}%
1179 \def\@permissionCodeOne{1936-1955}%
1180 \or % JDS
1181 \def\@journalName{ACM/JMS Journal of Data Science}%
1182 \def\@journalNameShort{ACM/IMS J. Data Sci.}%
1183 \def\@permissionCodeOne{2831-3194}%
1184 \def\@permissionCodeTwo{2831-3194}%
1185 \or % JEA
1186 \def\@journalName{ACM Journal of Experimental Algorithmics}%
1187 \def\@journalNameShort{ACM J. Exp. Algor.}%
1188 \def\@permissionCodeOne{1084-6654}%
1189 \or % JERIC
1190 \def\@journalName{ACM Journal of Educational Resources in Computing}%
1191 \def\@journalNameShort{ACM J. Edu. Resources in Comput.}%
1192 \def\@permissionCodeOne{1073-0516}%
1193 \or % JETC
1194 \def\@journalName{ACM Journal on Emerging Technologies in Computing Systems}%
1195 \def\@journalNameShort{ACM J. Emerg. Technol. Comput. Syst.}%
1196 \def\@permissionCodeOne{1550-4832}%
1197 \or % JOCCH
1198 \def\@journalName{ACM Journal on Computing and Cultural Heritage}%
1199 \def\@journalNameShort{ACM J. Comput. Cult. Herit.}%
1200 \def\@permissionCodeOne{1556-4673}%
1201 \def\@permissionCodeTwo{1556-4711}%
1202 \or % JRC
1203 \def\@journalName{ACM Journal on Responsible Computing}%
1204 \def\@journalNameShort{ACM J. Responsib. Comput.}%
1205 \def\@permissionCodeOne{2832-0565}%
1206 \or % PACMCGIT
1207 \def\@journalName{Proceedings of the ACM on Computer Graphics and Interactive Techniques}%
1208 \def\@journalNameShort{Proc. ACM Comput. Graph. Interact. Tech.}%
1209 \def\@permissionCodeOne{2577-6193}%
1210 \@ACM@screentruer
1211 \PackageInfo{\@classname}{Using screen mode due to \@journalCode}%
1212 \or % PACMHCI
1213 \def\@journalName{Proceedings of the ACM on Human-Computer Interaction}%
1214 \def\@journalNameShort{Proc. ACM Hum.-Comput. Interact.}%
1215 \def\@permissionCodeOne{2573-0142}%
1216 \@ACM@screentruer
1217 \PackageInfo{\@classname}{Using screen mode due to \@journalCode}%
1218 \or % PACMNET
1219 \def\@journalName{Proceedings of the ACM on Networkng}%
1220 \def\@journalNameShort{Proc. ACM Netw.}%
1221 \def\@permissionCodeOne{2834-5509}%
1222 \or % PACMPL
1223 \def\@journalName{Proceedings of the ACM on Programming Languages}%
1224 \def\@journalNameShort{Proc. ACM Program. Lang.}%
1225 \def\@permissionCodeOne{2475-1421}%
1226 \@ACM@screentruer
1227 \PackageInfo{\@classname}{Using screen mode due to \@journalCode}%

```

```

1228 \or % POMACS
1229 \def\@journalName{Proceedings of the ACM on Measurement and Analysis of Computing Systems}%
1230 \def\@journalNameShort{Proc. ACM Meas. Anal. Comput. Syst.}%
1231 \def\@permissionCodeOne{2476-1249}%
1232 \@ACM@screentruer
1233 \PackageInfo{\@classname}{Using screen mode due to \@journalCode}%
1234 \or % TAAS
1235 \def\@journalName{ACM Transactions on Autonomous and Adaptive Systems}%
1236 \def\@journalNameShort{ACM Trans. Autonom. Adapt. Syst.}%
1237 \def\@permissionCodeOne{1556-4665}%
1238 \or % TACCESS
1239 \def\@journalName{ACM Transactions on Accessible Computing}%
1240 \def\@journalNameShort{ACM Trans. Access. Comput.}%
1241 \def\@permissionCodeOne{1936-7228}%
1242 \or % TACO
1243 \def\@journalName{ACM Transactions on Architecture and Code Optimization}%
1244 \def\@journalNameShort{ACM Trans. Arch. Code Optim.}%
1245 \def\@permissionCodeOne{1544-3566}%
1246 \def\@permissionCodeTwo{1544-3973}%
1247 \or % TALG
1248 \def\@journalName{ACM Transactions on Algorithms}%
1249 \def\@journalNameShort{ACM Trans. Algor.}%
1250 \def\@permissionCodeOne{1549-6325}%
1251 \or % TALLIP
1252 \def\@journalName{ACM Transactions on Asian and Low-Resource Language Information Processing}%
1253 \def\@journalNameShort{ACM Trans. Asian Low-Resour. Lang. Inf. Process.}%
1254 \def\@permissionCodeOne{2375-4699}%
1255 \or % TAP
1256 \def\@journalName{ACM Transactions on Applied Perception}%
1257 \def\@journalNameShort{ACM Trans. Appl. Percept.}%
1258 \def\@permissionCodeOne{1544-3558}%
1259 \or % TCPS
1260 \def\@journalName{ACM Transactions on Cyber-Physical Systems}%
1261 \def\@journalNameShort{ACM Trans. Cyber-Phys. Syst.}%
1262 \def\@permissionCodeOne{2378-962X}%
1263 \or % TDS
1264 \def\@journalName{ACM/IMS Transactions on Data Science}%
1265 \def\@journalNameShort{ACM/IMS Trans. Data Sci.}%
1266 \def\@permissionCodeOne{2577-3224}%
1267 \or % TEAC
1268 \def\@journalName{ACM Transactions on Economics and Computation}%
1269 \def\@journalNameShort{ACM Trans. Econ. Comput.}%
1270 \def\@permissionCodeOne{2167-8375}%
1271 \or % TECS
1272 \def\@journalName{ACM Transactions on Embedded Computing Systems}%
1273 \def\@journalNameShort{ACM Trans. Embedd. Comput. Syst.}%
1274 \def\@permissionCodeOne{1539-9087}%
1275 \or % TELO
1276 \def\@journalName{ACM Transactions on Evolutionary Learning}%
1277 \def\@journalNameShort{ACM Trans. Evol. Learn.}%
1278 \def\@permissionCodeOne{2688-3007}%
1279 \or % THRI
1280 \def\@journalName{ACM Transactions on Human-Robot Interaction}%
1281 \def\@journalNameShort{ACM Trans. Hum.-Robot Interact.}%

```

```

1282 \def\@permissionCodeOne{2573-9522}%
1283 \or % TIIS
1284 \def\@journalName{ACM Transactions on Interactive Intelligent Systems}%
1285 \def\@journalNameShort{ACM Trans. Interact. Intell. Syst.}%
1286 \def\@permissionCodeOne{2160-6455}%
1287 \or % TIOT
1288 \def\@journalName{ACM Transactions on Internet of Things}%
1289 \def\@journalNameShort{ACM Trans. Internet Things}%
1290 \def\@permissionCodeOne{2577-6207}%
1291 \or % TISSEC
1292 \def\@journalName{ACM Transactions on Information and System Security}%
1293 \def\@journalNameShort{ACM Trans. Info. Syst. Sec.}%
1294 \def\@permissionCodeOne{1094-9224}%
1295 \or % TIST
1296 \def\@journalName{ACM Transactions on Intelligent Systems and Technology}%
1297 \def\@journalNameShort{ACM Trans. Intell. Syst. Technol.}%
1298 \def\@permissionCodeOne{2157-6904}%
1299 \or % TKDD
1300 \def\@journalName{ACM Transactions on Knowledge Discovery from Data}%
1301 \def\@journalNameShort{ACM Trans. Knowl. Discov. Data.}%
1302 \def\@permissionCodeOne{1556-4681}%
1303 \or % TMIS
1304 \def\@journalName{ACM Transactions on Management Information Systems}%
1305 \def\@journalNameShort{ACM Trans. Manag. Inform. Syst.}%
1306 \def\@permissionCodeOne{2158-656X}%
1307 \or % TOCE
1308 \def\@journalName{ACM Transactions on Computing Education}%
1309 \def\@journalNameShort{ACM Trans. Comput. Educ.}%
1310 \def\@permissionCodeOne{1946-6226}%
1311 \or % TOCHI
1312 \def\@journalName{ACM Transactions on Computer-Human Interaction}%
1313 \def\@journalNameShort{ACM Trans. Comput.-Hum. Interact.}%
1314 \def\@permissionCodeOne{1073-0516}%
1315 \or % TOCL
1316 \def\@journalName{ACM Transactions on Computational Logic}%
1317 \def\@journalNameShort{ACM Trans. Comput. Logic}%
1318 \def\@permissionCodeOne{1529-3785}%
1319 \or % TOCS
1320 \def\@journalName{ACM Transactions on Computer Systems}%
1321 \def\@journalNameShort{ACM Trans. Comput. Syst.}%
1322 \def\@permissionCodeOne{0734-2071}%
1323 \or % TOCT
1324 \def\@journalName{ACM Transactions on Computation Theory}%
1325 \def\@journalNameShort{ACM Trans. Comput. Theory}%
1326 \def\@permissionCodeOne{1942-3454}%
1327 \or % TODAES
1328 \def\@journalName{ACM Transactions on Design Automation of Electronic Systems}%
1329 \def\@journalNameShort{ACM Trans. Des. Autom. Electron. Syst.}%
1330 \def\@permissionCodeOne{1084-4309}%
1331 \or % TODS
1332 \def\@journalName{ACM Transactions on Database Systems}%
1333 \def\@journalNameShort{ACM Trans. Datab. Syst.}%
1334 \def\@permissionCodeOne{0362-5915}%
1335 \or % TOG

```

```

1336 \def\@journalName{ACM Transactions on Graphics}%
1337 \def\@journalNameShort{ACM Trans. Graph.}%
1338 \def\@permissionCodeOne{0730-0301}
1339 \or % TOIS
1340 \def\@journalName{ACM Transactions on Information Systems}%
1341 \def\@journalNameShort{ACM Trans. Inf. Syst.}%
1342 \def\@permissionCodeOne{1046-8188}%
1343 \or % TOIT
1344 \def\@journalName{ACM Transactions on Internet Technology}%
1345 \def\@journalNameShort{ACM Trans. Internet Technol.}%
1346 \def\@permissionCodeOne{1533-5399}%
1347 \or % TOMACS
1348 \def\@journalName{ACM Transactions on Modeling and Computer Simulation}%
1349 \def\@journalNameShort{ACM Trans. Model. Comput. Simul.}%
1350 \def\@permissionCodeOne{1049-3301}%
1351 \def\@permissionCodeTwo{1558-1195}%
1352 \or % TOMM
1353 \def\@journalName{ACM Transactions on Multimedia Computing, Communications and Applications}%
1354 \def\@journalNameShort{ACM Trans. Multimedia Comput. Commun. Appl.}%
1355 \def\@permissionCodeOne{1551-6857}%
1356 \def\@permissionCodeTwo{1551-6865}%
1357 \or % TOMPECS
1358 \def\@journalName{ACM Transactions on Modeling and Performance Evaluation of Computing Systems}%
1359 \def\@journalNameShort{ACM Trans. Model. Perform. Eval. Comput. Syst.}%
1360 \def\@permissionCodeOne{2376-3639}%
1361 \or % TOMS
1362 \def\@journalName{ACM Transactions on Mathematical Software}%
1363 \def\@journalNameShort{ACM Trans. Math. Softw.}%
1364 \def\@permissionCodeOne{0098-3500}%
1365 \or % TOPC
1366 \def\@journalName{ACM Transactions on Parallel Computing}%
1367 \def\@journalNameShort{ACM Trans. Parallel Comput.}%
1368 \def\@permissionCodeOne{2329-4949}%
1369 \def\@permissionCodeTwo{2329-4957}%
1370 \or % TOPS
1371 \def\@journalName{ACM Transactions on Privacy and Security}%
1372 \def\@journalNameShort{ACM Trans. Priv. Sec.}%
1373 \def\@permissionCodeOne{2471-2566}%
1374 \or % TOPLAS
1375 \def\@journalName{ACM Transactions on Programming Languages and Systems}%
1376 \def\@journalNameShort{ACM Trans. Program. Lang. Syst.}%
1377 \def\@permissionCodeOne{0164-0925}%
1378 \or % TORS
1379 \def\@journalName{ACM Transactions on Recommender Systems}%
1380 \def\@journalNameShort{ACM Trans. Recomm. Syst.}%
1381 \def\@permissionCodeOne{2770-6699}%
1382 \or % TOS
1383 \def\@journalName{ACM Transactions on Storage}%
1384 \def\@journalNameShort{ACM Trans. Storage}%
1385 \def\@permissionCodeOne{1553-3077}%
1386 \or % TOSEM
1387 \def\@journalName{ACM Transactions on Software Engineering and Methodology}%
1388 \def\@journalNameShort{ACM Trans. Softw. Eng. Methodol.}%
1389 \def\@permissionCodeOne{1049-331X}%

```

```

1390 \or % TOSN
1391 \def\@journalName{ACM Transactions on Sensor Networks}%
1392 \def\@journalNameShort{ACM Trans. Sensor Netw.}%
1393 \def\@permissionCodeOne{1550-4859}%
1394 \or % TQC
1395 \def\@journalName{ACM Transactions on Quantum Computing}%
1396 \def\@journalNameShort{ACM Trans. Quantum Comput.}%
1397 \def\@permissionCodeOne{2643-6817}%
1398 \or % TRET
1399 \def\@journalName{ACM Transactions on Reconfigurable Technology and Systems}%
1400 \def\@journalNameShort{ACM Trans. Reconfig. Technol. Syst.}%
1401 \def\@permissionCodeOne{1936-7406}%
1402 \or % TSAS
1403 \def\@journalName{ACM Transactions on Spatial Algorithms and Systems}%
1404 \def\@journalNameShort{ACM Trans. Spatial Algorithms Syst.}%
1405 \def\@permissionCodeOne{2374-0353}%
1406 \or % TSC
1407 \def\@journalName{ACM Transactions on Social Computing}%
1408 \def\@journalNameShort{ACM Trans. Soc. Comput.}%
1409 \def\@permissionCodeOne{2469-7818}%
1410 \or % TSLP
1411 \def\@journalName{ACM Transactions on Speech and Language Processing}%
1412 \def\@journalNameShort{ACM Trans. Speech Lang. Process.}%
1413 \def\@permissionCodeOne{1550-4875}%
1414 \or % TWEB
1415 \def\@journalName{ACM Transactions on the Web}%
1416 \def\@journalNameShort{ACM Trans. Web}%
1417 \def\@permissionCodeOne{1559-1131}%
1418 \else % FACMP, a dummy journal
1419 \def\@journalName{ACM Just Accepted}%
1420 \def\@journalNameShort{ACM Accepted}%
1421 \def\@permissionCodeOne{XXXX-XXXX}%
1422 \fi
1423 \ClassInfo{\@classname}{Using journal code \@journalCode}%
1424 }{%
1425 \ClassError{\@classname}{Incorrect journal #1}%
1426 }%

```

\acmJournal And the syntactic sugar around it

```

1427 \def\acmJournal#1{\setkeys{ACM}{acmJournal=#1}%
1428 \global\@ACM@journal@bibstriptrue}

```

The defaults:

```

1429 \def\@journalCode@nr{0}
1430 \def\@journalName{}%
1431 \def\@journalNameShort{\@journalName}%
1432 \def\@permissionCodeOne{XXXX-XXXX}%
1433 \def\@permissionCodeTwo{}%

```

\acmConference This is the conference command

```

1434 \newcommand\acmConference[4][[]]{%
1435 \gdef\acmConference@shortname{#1}%
1436 \gdef\acmConference@name{#2}%
1437 \gdef\acmConference@date{#3}%

```

```

1438 \gdef\acmConference@venue{#4}%
1439 \ifx\acmConference@shortname\@empty
1440 \gdef\acmConference@shortname{#2}%
1441 \fi
1442 \global\@ACM@journal@bibstripfalse
1443 }
1444 \if@ACM@journal\else
1445 \acmConference[Conference'17]{ACM Conference}{July 2017}{Washington,
1446 DC, USA}%
1447 \fi

\acmBooktitle The book title of the conference:
\@acmBooktitle 1448 \def\acmBooktitle#1{\gdef\@acmBooktitle{#1}}
1449 \acmBooktitle{}
1450 \ifx\acmConference@name\@undefined\else
1451 \acmBooktitle{Proceedings of \acmConference@name
1452 \ifx\acmConference@name\acmConference@shortname\else
1453 \ (\acmConference@shortname)\fi}
1454 \fi

\@editorsAbbrev How to abbreviate editors
1455 \def\@editorsAbbrev{(Ed.)}

\@acmEditors The list of editors
1456 \def\@acmEditors{}

\editor Add a new editor to the list
1457 \def\editor#1{\ifx\@acmEditors\@empty
1458 \gdef\@acmEditors{#1}%
1459 \else
1460 \gdef\@editorsAbbrev{(Eds.)}%
1461 \g@addto@macro\@acmEditors{\and#1}%
1462 \fi}

\subtitle The subtitle macro
1463 \def\subtitle#1{\def\@subtitle{#1}}
1464 \subtitle{}

\num@authorgroups The total number of “groups”. Each group is several authors with the same affiliations(s)
1465 \newcount\num@authorgroups
1466 \num@authorgroups=0\relax

\num@authors The total number of authors
1467 \newcount\num@authors
1468 \num@authors=0\relax

\if@insideauthorgroup Whether we are continuing an author group
1469 \newif\if@insideauthorgroup
1470 \@insideauthorgroupfalse

\author Adding an author to the list of authors and addresses.
Note that we want to typeset the link to the author’s orcid if known. The problem
is, we know the orcid only after the author is entered. The trick is based on the idea

```

that `\csname... \endcsname` is `\relax` unless defined. Therefore we typeset authors by the special macro `\csname typeset@author\the\num@authors\endcsname`, which is defined by `\orcid` command.

```

1471 \renewcommand\author[2][{}%
1472 \IfSubStr{\detokenize{#2}}{,}{\ClassWarning{\@classname}{Do not put several
1473 authors in the same \string\author\space macro!}}{}%
1474 \global\advance\num@authors by 1\relax
1475 \if@insideauthorgroup\else
1476 \global\advance\num@authorgroups by 1\relax
1477 \global\@insideauthorgrouptrue
1478 \fi
1479 \ifx\addresses\@empty
1480 \if@ACM@anonymous
1481 \gdef\addresses{\@author{Anonymous Author(s)}%
1482 \ifx\@acmSubmissionID\@empty\else\Submission Id:
1483 \@acmSubmissionID\fi}%
1484 \gdef\authors{Anonymous Author(s)}%
1485 \else
1486 \expandafter\gdef\expandafter\addresses\expandafter{%
1487 \expandafter\@author\expandafter{%
1488 \csname typeset@author\the\num@authors\endcsname{#2}}}%
1489 \gdef\authors{#2}%
1490 \fi
1491 \else
1492 \if@ACM@anonymous\else
1493 \expandafter\g@addto@macro\expandafter\addresses\expandafter{%
1494 \expandafter\and\expandafter\@author\expandafter{%
1495 \csname typeset@author\the\num@authors\endcsname{#2}}}%
1496 \g@addto@macro\authors{\and#2}%
1497 \fi
1498 \fi
1499 \if@ACM@anonymous
1500 \ifx\shortauthors\@empty
1501 \gdef\shortauthors{Anon.
1502 \ifx\@acmSubmissionID\@empty\else Submission Id:
1503 \@acmSubmissionID\fi}%
1504 \fi
1505 \else
1506 \def\@tempa{#1}%
1507 \ifx\@tempa\@empty
1508 \ifx\shortauthors\@empty
1509 \gdef\shortauthors{#2}%
1510 \else
1511 \g@addto@macro\shortauthors{\and#2}%
1512 \fi
1513 \else
1514 \ifx\shortauthors\@empty
1515 \gdef\shortauthors{#1}%
1516 \else
1517 \g@addto@macro\shortauthors{\and#1}%
1518 \fi
1519 \fi
1520 \fi}

```

`\affiliation` The macro `\affiliation` mimics `\address` from `amsart`. Note that it has an optional argument, which we use differently from `amsart`.

```
1521 \newcommand{\affiliation}[2][{}]{%
1522   \global\@insideauthorgroupfalse
1523   \if@ACM@anonymous\else
1524     \g@addto@macro\addresses{\affiliation{#1}{#2}}%
1525   \fi}
```

`\ACM@affiliation@obeypunctuation` Whether to use the author's punctuation (false by default, which adds American-style address punctuation)

```
1526 \define@boolkey+{@ACM@affiliation@}{@ACM@affiliation@}{obeypunctuation}%
1527 [true]{\ClassError{\@classname}{The option obeypunctuation can be either true or false}}
```

`\additionalaffiliation` Additional affiliations go to footnotes

```
1528 \def\additionalaffiliation#1{\authornote{\@additionalaffiliation{#1}}}
```

`\@additionalaffiliation` Process `\additionalaffiliation` inside `\authornote`

```
1529 \def\@additionalaffiliation#1{\bgroup
1530   \def\position##1{\ignorespaces}%
1531   \def\institution##1{##1\ignorespaces}%
1532   \def\department{\@ifnextchar[{\@department}{\@department[]}}%
1533   \def\@department[##1]##2{\unskip, ##2\ignorespaces}%
1534   \let\streetaddress\position
1535   \let\city\position
1536   \let\state\position
1537   \let\postcode\position
1538   \let\country\position
1539   Also with #1\unskip.\egroup}
```

`\email` The macro `\email` mimics `\email` from `amsart`. Again, it has an optional argument that we do not currently need but keep for possible future use.

```
1540 \renewcommand{\email}[2][{}]{%
1541   \IfSubStr{#2}{,}{\ClassWarning{\@classname}{Do not put several
1542     addresses in the same \string\email\space macro!}}{}%
1543   \if@ACM@anonymous\else
1544     \g@addto@macro\addresses{\email{#1}{#2}}%
1545   \fi}
```

`\orcid` We redefine the command to typeset the current author

```
1546 \def\orcid#1{\unskip\ignorespaces%
1547   \IfBeginWith{#1}{http}{%
1548     \expandafter\gdef\csname
1549       typeset@author\the\num@authors\endcsname##1{%
1550       \href{#1}{##1}}}%
1551   \expandafter\gdef\csname
1552     typeset@author\the\num@authors\endcsname##1{%
1553     \href{https://orcid.org/#1}{##1}}}
```

`\authorsaddresses` Setting up authors' addresses

```
1554 \def\authorsaddresses#1{\def\@authorsaddresses{#1}}
1555 \authorsaddresses{\@mkauthorsaddresses}
```

```

\mktranslatedkeywords We have two argument: the language to typeset keywords and the keywords.
1556 \newcommand\mktranslatedkeywords[2]{\bgroup
1557   \selectlanguage{#1}%
1558   {\@specialsection{\keywordsname}%
1559     \noindent#2\par}\egroup}

\@titlenotes The title notes
1560 \def\@titlenotes{}

\titlenote Adding a note to the title
1561 \def\titlenote#1{%
1562   \g@addto@macro\@title{\footnotemark}%
1563   \if@ACM@anonymous
1564     \g@addto@macro\@titlenotes{%
1565       \stepcounter{footnote}\footnotetext{Title note}}%
1566   \else
1567     \g@addto@macro\@titlenotes{\stepcounter{footnote}\footnotetext{#1}}%
1568   \fi}

\@subtitlenotes The subtitle notes
1569 \def\@subtitlenotes{}

\subtitlenote Adding a note to the subtitle
1570 \def\subtitlenote#1{%
1571   \g@addto@macro\@subtitle{\footnotemark}%
1572   \if@ACM@anonymous
1573     \g@addto@macro\@subtitlenotes{%
1574       \stepcounter{footnote}\footnotetext{Subtitle note}}%
1575   \else
1576     \g@addto@macro\@subtitlenotes{%
1577       \stepcounter{footnote}\footnotetext{#1}}%
1578   \fi}

\@authornotes The author notes
1579 \def\@authornotes{}

\authornote Adding a note to the author
1580 \def\authornote#1{%
1581   \if@ACM@anonymous\else
1582     \g@addto@macro\addresses{\@authornotemark}%
1583     \g@addto@macro\@authornotes{%
1584       \stepcounter{footnote}\footnotetext{#1}}%
1585   \fi}

\authornotemark Adding a footnote mark to the authors
1586 \newcommand\authornotemark[1][\relax]{%
1587   \ifx#1\relax\relax\relax
1588   \g@addto@macro\addresses{\@authornotemark}%
1589   \else
1590   \g@addto@macro\addresses{\@authornotemark{#1}}%
1591   \fi}

```

`\acmVolume` The current volume  
1592 `\def\acmVolume#1{\def\@acmVolume{#1}}`  
1593 `\acmVolume{1}`

`\acmNumber` The current number  
1594 `\def\acmNumber#1{\def\@acmNumber{#1}}`  
1595 `\acmNumber{1}`

`\acmArticle` The current article  
1596 `\def\acmArticle#1{\def\@acmArticle{#1}}`  
1597 `\acmArticle{}`

`\acmArticleSeq` The sequence number  
1598 `\def\acmArticleSeq#1{\def\@acmArticleSeq{#1}}`  
1599 `\acmArticleSeq{\@acmArticle}`

`\acmYear` The current year  
1600 `\def\acmYear#1{\def\@acmYear{#1}}`  
1601 `\acmYear{\the\year}`

`\acmMonth` The current month  
1602 `\def\acmMonth#1{\def\@acmMonth{#1}}`  
1603 `\acmMonth{\the\month}`

`\@acmPubDate` The publication date  
1604 `\def\@acmPubDate{\ifcase\@acmMonth\or`  
1605 `January\or February\or March\or April\or May\or June\or`  
1606 `July\or August\or September\or October\or November\or`  
1607 `December\fi~\@acmYear}`

`\acmPrice` The price  
1608 `\def\acmPrice#1{\def\@acmPrice{#1}}`  
1609 `\acmPrice{15.00}`

`\acmSubmissionID` The submission ID  
1610 `\def\acmSubmissionID#1{\def\@acmSubmissionID{#1}}`  
1611 `\acmSubmissionID{}`

`\acmISBN` The book ISBN  
1612 `\def\acmISBN#1{\def\@acmISBN{#1}}`  
1613 `\acmISBN{978-x-xxxx-xxxx-x/YY/MM}`

`\acmDOI` The paper DOI  
1614 `\def\acmDOI#1{\def\@acmDOI{#1}}`  
1615 `\acmDOI{10.1145/nnnnnnn.nnnnnnn}`

`\if@ACM@badge` Whether to print a badge. Note that either a left or right badge triggers it:  
1616 `\newif\if@ACM@badge`  
1617 `\@ACM@badgefalse`

`\@ACM@badge@width` The width of the badge  
1618 `\newlength\@ACM@badge@width`  
1619 `\setlength\@ACM@badge@width{5pc}`

`\@ACM@title@width` The width of the badge  
1620 `\newlength\@ACM@title@width`

`\@ACM@badge@skip` The space between the badge and the title  
1621 `\newlength\@ACM@badge@skip`  
1622 `\setlength\@ACM@badge@skip{1pc}`

`\acmBadgeR` Setting the right badge  
1623 `\newcommand\acmBadgeR[2][\@ACM@badgetrue`  
1624 `\def\@acmBadgeR@url{#1}%`  
1625 `\def\@acmBadgeR@image{#2}}`  
1626 `\def\@acmBadgeR@url{}`  
1627 `\def\@acmBadgeR@image{}`

`\acmBadgeL` Setting the left badge  
1628 `\newcommand\acmBadgeL[2][\@ACM@badgetrue`  
1629 `\def\@acmBadgeL@url{#1}%`  
1630 `\def\@acmBadgeL@image{#2}}`  
1631 `\def\@acmBadgeL@url{}`  
1632 `\def\@acmBadgeL@image{}`

`\startPage` The start page of the paper  
1633 `\def\startPage#1{\def\@startPage{#1}}`  
1634 `\startPage{}`

`\terms` Terms are obsolete. We use CCS now.  
1635 `\def\terms#1{\ClassWarning{\@classname}{The command \string\terms{} is`  
1636 `obsolete. I am going to ignore it}}`

`\keywords` Keywords are mostly obsolete. We use CCS now. Still it makes sense to keep them for compatibility.  
1637 `\def\keywords#1{\def\@keywords{#1}}`  
1638 `\let\@keywords\@empty`  
  
1639 `\AtEndDocument{\if@ACM@nonacm\else\ifx\@keywords\@empty`  
1640 `\ifnum\getrefnumber{TotPages}>2\relax`  
1641 `\ClassWarningNoLine{\@classname}{ACM keywords are mandatory`  
1642 `for papers over two pages}%`  
1643 `\fi\fi\fi}`

`abstract` The amsart package puts abstract in a box. Since we do not know whether we will use two-column mode, we prefer to save the text  
1644 `\renewenvironment{abstract}{\Collect@Body\@saveabstract}{}`

`\@saveabstract` And saving the abstract  
1645 `\long\def\@saveabstract#1{\if@ACM@maketitle@typeset`  
1646 `\ClassError{\@classname}{Abstract must be defined before maketitle`  
1647 `command. Please move it!}\fi`  
1648 `\long\gdef\@abstract{#1}}`  
1649 `\@saveabstract{}`

`\@empty` The long version of `\@empty` (to compare with `\@abstract`)  
1650 `\long\def\@empty{}`

```

\if@ACM@printccs Whether to print CCS
1651 \define@boolkey+{@ACM@topmatter@}[@ACM@]{printccs}[true]{%
1652   \if@ACM@printccs
1653     \ClassInfo{\@classname}{Printing CCS}%
1654   \else
1655     \ClassInfo{\@classname}{Suppressing CCS}%
1656   \fi}{\ClassError{\@classname}{The option printccs can be either true or false}}

\if@ACM@printacmref Whether to print the ACM bibstrip
1657 \define@boolkey+{@ACM@topmatter@}[@ACM@]{printacmref}[true]{%
1658   \if@ACM@printacmref
1659     \ClassInfo{\@classname}{Printing bibformat}%
1660   \else
1661     \ClassInfo{\@classname}{Suppressing bibformat}%
1662   \fi}{\ClassError{\@classname}{The option printacmref can be either true or false}}

1663 \AtEndDocument{\if@ACM@nonacm\else\if@ACM@printacmref\else
1664   \ifnum\getrefnumber{TotPages}>1\relax
1665   \ClassWarningNoLine{\@classname}{%
1666     ACM reference format is mandatory \MessageBreak
1667     for papers over one page. \MessageBreak
1668     Please add printacmref=true to the \MessageBreak
1669     \string\settopmatter\space command.}%
1670   \fi\fi\fi}

\if@ACM@printfolios Whether to print folios
1671 \define@boolkey+{@ACM@topmatter@}[@ACM@]{printfolios}[true]{%
1672   \if@ACM@printfolios
1673     \ClassInfo{\@classname}{Printing folios}%
1674   \else
1675     \ClassInfo{\@classname}{Suppressing folios}%
1676   \fi}{\ClassError{\@classname}{The option printfolios can be either true or false}}

@ACM@authorsperrrow The number of authors per row. 0 means use the default algorithm.
1677 \define@cmdkey{@ACM@topmatter@}[@ACM@]{authorsperrrow}[0]{%
1678   \IfInteger{#1}{\ClassInfo{\@classname}{Setting authorsperrrow to
1679     #1}}{\ClassWarning{\@classname}{The parameter authorsperrrow must be
1680     numerical. Ignoring the input #1}}\gdef\@ACM@authorsperrrow{0}}

\settopmatter The usual syntactic sugar
1681 \def\settopmatter#1{\setkeys{@ACM@topmatter@}{#1}}

Now the settings
1682 \settopmatter{printccs=true, printacmref=true}
1683 \if@ACM@manuscript
1684   \settopmatter{printfolios=true}
1685 \else
1686   \if@ACM@journal
1687     \settopmatter{printfolios=true}
1688   \else
1689     \settopmatter{printfolios=false}
1690   \fi
1691 \fi
1692 \settopmatter{authorsperrrow=0}

```

\@received The container for the paper history

```
1693 \def\@received{}
```

\received The \received command

```
1694 \newcommand\received[2][\def\@tempa{#1}%
1695   \ifx\@tempa\@empty
1696     \ifx\@received\@empty
1697       \gdef\@received{Received #2}%
1698     \else
1699       \g@addto@macro{\@received}{; revised #2}%
1700     \fi
1701   \else
1702     \ifx\@received\@empty
1703       \gdef\@received{#1 #2}%
1704     \else
1705       \g@addto@macro{\@received}{; #1 #2}%
1706     \fi
1707   \fi}
1708 \AtEndDocument{%
1709   \ifx\@received\@empty\else
1710     \par\bigskip\noindent\small\normalfont\@received\par
1711   \fi}
```

\acmArticleType Article type. We set up the color.

```
1712 \define@choicekey+{ACM}{articletype}[\ACM@ArticleType\ACM@ArticleType@nr]{%
1713   Research,Review,Discussion,Invited,Position}[Review]{%
1714   \ifcase\ACM@ArticleType@nr
1715     \relax % Research
1716     \colorlet{@ACM@Article@color}{ACMBlue}%
1717   \or % Review
1718     \colorlet{@ACM@Article@color}{ACMOrange}%
1719   \or % Discussion
1720     \colorlet{@ACM@Article@color}{ACMGreen}%
1721   \or % Invited
1722     \colorlet{@ACM@Article@color}{ACMPurple}%
1723   \or % Position
1724     \colorlet{@ACM@Article@color}{ACMRed}%
1725   \fi
1726 }{%
1727   \ClassError{\@classname}{Article Type must be Research, Review,\MessageBreak
1728     Discussion, Invited, or Position}}
1729 \def\acmArticleType#1{\setkeys{ACM}{articletype=#1}}
1730 \newenvironment{@ACM@color@frame}{%
1731   \def\FrameCommand{\hspace*{-6.5pc}}%
1732   \colorbox{@ACM@Article@color!10!white}}%
1733   \MakeFramed {\advance\hsize -6.5pc\relax\FrameRestore}}{\endMakeFramed}
1734 \if@ACM@acmcp
1735   \acmArticleType{Research}%
1736 \fi
```

\acmCodeLink The code link

```
1737 \def\acmCodeLink#1{%
1738   \ifx\@acmCodeDataLink\@empty
1739     \gdef\@acmCodeDataLink{\url{#1}}%
```

```

1740 \else
1741 \g@addto@macro{\@acmCodeDataLink}{\ \ \url{#1}}%
1742 \fi}
1743 \def\@acmCodeDataLink{}

```

\acmDataLink The code link

```
1744 \let\acmDataLink\acmCodeLink
```

### 3.17 Concepts system

We exclude CCSXML stuff generated by the ACM system:

```

1745 \RequirePackage{comment}
1746 \excludecomment{CCSXML}

```

\@concepts This is the storage macro and counter for concepts

```

1747 \let\@concepts\@empty
1748 \newcounter{@concepts}

```

\ccsdesc The first argument is the significance, the second is the concept(s)

```

1749 \newcommand\ccsdesc[2][100]{%
1750 \ccsdesc@parse#1~#2~\ccsdesc@parse@end}

```

\ccsdesc@parse The parser of the expression Significance~General~Specific (we need textcomp for \textrightarrow). Note that Specific can be empty!

```

1751 \def\textrightarrow{\rightarrow}
1752 \def\ccsdesc@parse#1~#2~#3~{%
1753 \stepcounter{@concepts}%
1754 \expandafter\ifx\csname CCS@General@#2\endcsname\relax
1755 \expandafter\gdef\csname CCS@General@#2\endcsname{\textbullet\
1756 \textbf{#2}}%
1757 \expandafter\gdef\csname CCS@Punctuation@#2\endcsname{;}%
1758 \expandafter\gdef\csname CCS@Specific@#2\endcsname{}%
1759 \g@addto@macro{\@concepts}{\csname CCS@General@#2\endcsname
1760 \csname CCS@Punctuation@#2\endcsname
1761 \csname CCS@Specific@#2\endcsname}%
1762 \fi
1763 \ifx#3\relax\relax\else
1764 \expandafter\gdef\csname CCS@Punctuation@#2\endcsname{
1765 \textrightarrow\ }%
1766 \expandafter\g@addto@macro\expandafter{\csname CCS@Specific@#2\endcsname}{%
1767 \addtocounter{@concepts}{-1}%
1768 \ifnum#1>499\textbf{#3}\else
1769 \ifnum#1>299\textit{#3}\else
1770 #3\fi\fi\ifnum\value{@concepts}=0.\else; \fi}%
1771 \fi
1772 \ccsdesc@parse@finish}

1773 \AtEndDocument{\if@ACM@nonacm\else\ifx\@concepts\@empty\relax
1774 \ifnum\getrefnumber{TotPages}>2\relax
1775 \ClassWarningNoLine{\@classname}{CCS concepts are mandatory
1776 for papers over two pages}%
1777 \fi\fi\fi}

```

\ccdesc@parse@finish Gobble everything to \ccsdesc@parse@end

```
1778 \def\ccsdesc@parse@finish#1\ccsdesc@parse@end{}
```

### 3.18 Copyright system

This is from acmcopyright.sty

`\if@printcopyright` Whether to print a copyright symbol

```
1779 \newif\if@printcopyright
1780 \@printcopyrighttrue
```

`\if@printpermission` Whether to print the permission block

```
1781 \newif\if@printpermission
1782 \@printpermissiontrue
```

`\if@acmowned` Whether the ACM owns the rights to the paper

```
1783 \newif\if@acmowned
1784 \@acmownedtrue
```

Keys:

```
1785 \define@choicekey*{ACM@}{acmcopyrightmode}[%
1786   \acm@copyrightinput\acm@copyrightmode]{none,%
1787   acmcopyright,acmlicensed,rightsretained,%
1788   usgov,usgovmixed,cagov,cagovmixed,licensedusgovmixed,%
1789   licensedcagov,licensedcagovmixed,othergov,licensedothergov,%
1790   iw3c2w3,iw3c2w3g,cc}{%
1791   \@printpermissiontrue
1792   \@printcopyrighttrue
1793   \@acmownedtrue
1794   \ifnum\acm@copyrightmode=0\relax % none
1795   \@printpermissionfalse
1796   \@printcopyrightfalse
1797   \@acmownedfalse
1798   \fi
1799   \ifnum\acm@copyrightmode=2\relax % acmlicensed
1800   \@acmownedfalse
1801   \fi
1802   \ifnum\acm@copyrightmode=3\relax % rightsretained
1803   \@acmownedfalse
1804   \AtBeginDocument{\acmPrice{}}}%
1805   \fi
1806   \ifnum\acm@copyrightmode=4\relax % usgov
1807   \@printpermissiontrue
1808   \@printcopyrightfalse
1809   \@acmownedfalse
1810   \AtBeginDocument{\acmPrice{}}}%
1811   \fi
1812   \ifnum\acm@copyrightmode=6\relax % cagov
1813   \@acmownedfalse
1814   \fi
1815   \ifnum\acm@copyrightmode=8\relax % licensedusgovmixed
1816   \@acmownedfalse
1817   \fi
1818   \ifnum\acm@copyrightmode=9\relax % licensedcagov
1819   \@acmownedfalse
1820   \fi
1821   \ifnum\acm@copyrightmode=10\relax % licensedcagovmixed
```

```

1822 \@acmownedfalse
1823 \fi
1824 \ifnum\acm@copyrightmode=11\relax % othergov
1825 \@acmownedtrue
1826 \fi
1827 \ifnum\acm@copyrightmode=12\relax % licensedothergov
1828 \@acmownedfalse
1829 \fi
1830 \ifnum\acm@copyrightmode=13\relax % iw3c2w3
1831 \@acmownedfalse
1832 \AtBeginDocument{\acmPrice{}}%
1833 \fi
1834 \ifnum\acm@copyrightmode=14\relax % iw3c2w3g
1835 \@acmownedfalse
1836 \AtBeginDocument{\acmPrice{}}%
1837 \fi
1838 \ifnum\acm@copyrightmode=15\relax % cc
1839 \@acmownedfalse
1840 \AtBeginDocument{\acmPrice{}}%
1841 \fi}

```

\setcopyright This is the syntactic sugar around setting keys.

```

1842 \def\setcopyright#1{\setkeys{ACM@}{acmcopyrightmode=#1}}
1843 \setcopyright{acmcopyright}

```

\setcctype The type of Creative Commons license used

```

1844 \newcommand\setcctype[2][4.0]{%
1845 \def\ACM@cc@version{#1}%
1846 \def\ACM@cc@type{#2}}
1847 \setcctype{by}

```

\@copyrightowner Here is the owner of the copyright

```

1848 \def\@copyrightowner{%
1849 \ifcase\acm@copyrightmode\relax % none
1850 \or % acmcopyright
1851 Association for Computing Machinery.
1852 \or % acmlicensed
1853 Copyright held by the owner/author(s). Publication rights licensed to
1854 ACM\@.
1855 \or % rightsretained
1856 Copyright held by the owner/author(s).
1857 \or % usgov
1858 \or % usgovmixed
1859 Association for Computing Machinery.
1860 \or % cagov
1861 Crown in Right of Canada.
1862 \or %cagovmixed
1863 Association for Computing Machinery.
1864 \or %licensedusgovmixed
1865 Copyright held by the owner/author(s). Publication rights licensed to
1866 ACM\@.
1867 \or % licensedcagov
1868 Crown in Right of Canada. Publication rights licensed to
1869 ACM\@.

```

```

1870 \or %licensedcagovmixed
1871 Copyright held by the owner/author(s). Publication rights licensed to
1872 ACM\@.
1873 \or % othergov
1874 Association for Computing Machinery.
1875 \or % licensedothergov
1876 Copyright held by the owner/author(s). Publication rights licensed to
1877 ACM\@.
1878 \or % ic2w3www
1879 IW3C2 (International World Wide Web Conference Committee), published
1880 under Creative Commons CC-BY~4.0 License.
1881 \or % ic2w3wwwgoogle
1882 IW3C2 (International World Wide Web Conference Committee), published
1883 under Creative Commons CC-BY-NC-ND~4.0 License.
1884 \or % cc
1885 Copyright held by the owner/author(s).
1886 \fi}

```

\@formatdoi Print a clickable DOI

```

1887 \def\@formatdoi#1{\url{https://doi.org/#1}}

```

\@ACM@copyright@check@cc At present cC licenses can be used only for acmengage format or for non-acm stuff. This macro checks whether the CC license is applicable and generates an error if not.

```

1888 \def\@ACM@copyright@check@cc{%
1889   \if@ACM@nonacm
1890     \ClassInfo{\@classname}{Using CC license with a non-acm
1891       material}%
1892   \else
1893     \if@ACM@engage
1894       \ClassInfo{\@classname}{Using CC license with ACM Engage
1895         material}%
1896     \else
1897       \ClassError{\@classname}{%
1898         Sorry, Creative Commons licenses are\MessageBreak
1899         currently not used with ACM publications\MessageBreak
1900         typeset by the authors}{Please use nonacm
1901         option or ACM Engage class to enable CC licenses}%
1902     \fi
1903   \fi}

```

\@copyrightpermission The canned permission block.

```

1904 \def\@copyrightpermission{%
1905   \ifcase\acm@copyrightmode\relax % none
1906   \or % acmcopyright
1907     Permission to make digital or hard copies of all or part of this
1908     work for personal or classroom use is granted without fee provided
1909     that copies are not made or distributed for profit or commercial
1910     advantage and that copies bear this notice and the full citation on
1911     the first page. Copyrights for components of this work owned by
1912     others than ACM must be honored. Abstracting with credit is
1913     permitted. To copy otherwise, or republish, to post on servers or to
1914     redistribute to lists, requires prior specific permission
1915     and\hspace*{.5pt}/or a fee. Request permissions from
1916     permissions@acm.org.

```

1917 \or % acmlicensed  
1918 Permission to make digital or hard copies of all or part of this  
1919 work for personal or classroom use is granted without fee provided  
1920 that copies are not made or distributed for profit or commercial  
1921 advantage and that copies bear this notice and the full citation on  
1922 the first page. Copyrights for components of this work owned by  
1923 others than the author(s) must be honored. Abstracting with credit  
1924 is permitted. To copy otherwise, or republish, to post on servers  
1925 or to redistribute to lists, requires prior specific permission  
1926 and\hspace\*{.5pt}/or a fee. Request permissions from  
1927 permissions@acm.org.

1928 \or % rightsretained  
1929 Permission to make digital or hard copies of part or all of this work  
1930 for personal or classroom use is granted without fee provided that  
1931 copies are not made or distributed for profit or commercial advantage  
1932 and that copies bear this notice and the full citation on the first  
1933 page. Copyrights for third-party components of this work must be  
1934 honored. For all other uses, contact the  
1935 owner\hspace\*{.5pt}/author(s).

1936 \or % usgov  
1937 This paper is authored by an employee(s) of the United States  
1938 Government and is in the public domain. Non-exclusive copying or  
1939 redistribution is allowed, provided that the article citation is  
1940 given and the authors and agency are clearly identified as its  
1941 source.

1942 \or % usgovmixed  
1943 ACM acknowledges that this contribution was authored or co-authored  
1944 by an employee, contractor, or affiliate of the United States  
1945 government. As such, the United States government retains a  
1946 nonexclusive, royalty-free right to publish or reproduce this  
1947 article, or to allow others to do so, for government purposes only.

1948 \or % cagov  
1949 This article was authored by employees of the Government of Canada.  
1950 As such, the Canadian government retains all interest in the  
1951 copyright to this work and grants to ACM a nonexclusive,  
1952 royalty-free right to publish or reproduce this article, or to allow  
1953 others to do so, provided that clear attribution is given both to  
1954 the authors and the Canadian government agency employing them.  
1955 Permission to make digital or hard copies for personal or classroom  
1956 use is granted. Copies must bear this notice and the full citation  
1957 on the first page. Copyrights for components of this work owned by  
1958 others than the Canadian Government must be honored. To copy  
1959 otherwise, distribute, republish, or post, requires prior specific  
1960 permission and\hspace\*{.5pt}/or a fee. Request permissions from  
1961 permissions@acm.org.

1962 \or % cagovmixed  
1963 ACM acknowledges that this contribution was co-authored by an  
1964 affiliate of the national government of Canada. As such, the Crown  
1965 in Right of Canada retains an equal interest in the copyright.  
1966 Reprints must include clear attribution to ACM and the author's  
1967 government agency affiliation. Permission to make digital or hard  
1968 copies for personal or classroom use is granted. Copies must bear  
1969 this notice and the full citation on the first page. Copyrights for  
1970 components of this work owned by others than ACM must be honored.

1971 To copy otherwise, distribute, republish, or post, requires prior  
 1972 specific permission and\hspace\*{.5pt}/or a fee. Request permissions  
 1973 from permissions@acm.org.  
 1974 \or % licensedusgovmixed  
 1975 Publication rights licensed to ACM\@. ACM acknowledges that this  
 1976 contribution was authored or co-authored by an employee, contractor  
 1977 or affiliate of the United States government. As such, the  
 1978 Government retains a nonexclusive, royalty-free right to publish or  
 1979 reproduce this article, or to allow others to do so, for Government  
 1980 purposes only.  
 1981 \or % licensedcagov  
 1982 This article was authored by employees of the Government of Canada.  
 1983 As such, the Canadian government retains all interest in the  
 1984 copyright to this work and grants to ACM a nonexclusive,  
 1985 royalty-free right to publish or reproduce this article, or to allow  
 1986 others to do so, provided that clear attribution is given both to  
 1987 the authors and the Canadian government agency employing them.  
 1988 Permission to make digital or hard copies for personal or classroom  
 1989 use is granted. Copies must bear this notice and the full citation  
 1990 on the first page. Copyrights for components of this work owned by  
 1991 others than the Canadian Government must be honored. To copy  
 1992 otherwise, distribute, republish, or post, requires prior specific  
 1993 permission and\hspace\*{.5pt}/or a fee. Request permissions from  
 1994 permissions@acm.org.  
 1995 \or % licensedcagovmixed  
 1996 Publication rights licensed to ACM\@. ACM acknowledges that this  
 1997 contribution was authored or co-authored by an employee, contractor  
 1998 or affiliate of the national government of Canada. As such, the  
 1999 Government retains a nonexclusive, royalty-free right to publish or  
 2000 reproduce this article, or to allow others to do so, for Government  
 2001 purposes only.  
 2002 \or % othergov  
 2003 ACM acknowledges that this contribution was authored or co-authored  
 2004 by an employee, contractor or affiliate of a national government. As  
 2005 such, the Government retains a nonexclusive, royalty-free right to  
 2006 publish or reproduce this article, or to allow others to do so, for  
 2007 Government purposes only.  
 2008 \or % licensedothergov  
 2009 Publication rights licensed to ACM\@. ACM acknowledges that this  
 2010 contribution was authored or co-authored by an employee, contractor  
 2011 or affiliate of a national government. As such, the Government  
 2012 retains a nonexclusive, royalty-free right to publish or reproduce  
 2013 this article, or to allow others to do so, for Government purposes  
 2014 only.  
 2015 \or % iw3c2w3  
 2016 This paper is published under the Creative Commons Attribution~4.0  
 2017 International (CC-BY~4.0) license. Authors reserve their rights to  
 2018 disseminate the work on their personal and corporate Web sites with  
 2019 the appropriate attribution.  
 2020 \or % iw3c2w3g  
 2021 This paper is published under the Creative Commons  
 2022 Attribution-NonCommercial-NoDerivs~4.0 International  
 2023 (CC-BY-NC-ND~4.0) license. Authors reserve their rights to  
 2024 disseminate the work on their personal and corporate Web sites with

```

2025   the appropriate attribution.
2026 \or % CC
2027   \@ACM@copyright@check@cc
2028   \IfEq{\ACM@cc@type}{zero}{%
2029     \def\ACM@CC@Url{https://creativecommons.org/publicdomain/zero/1.0/legalcode}}{%
2030     \edef\ACM@CC@Url{https://creativecommons.org/licenses/\ACM@cc@type/\ACM@cc@version/legalcode}}%
2031     \href{\ACM@CC@Url}{\includegraphics[height=5ex]{doclicense-CC-\ACM@cc@type-88x31}}\
2032     \href{\ACM@CC@Url}{%
2033       This work is licensed under a Creative Commons
2034       \IfEq{\ACM@cc@type}{zero}{CC0 1.0 Universal}{%
2035         \IfEq{\ACM@cc@type}{by}{Attribution}{}%
2036         \IfEq{\ACM@cc@type}{by-sa}{Attribution-ShareAlike}{}%
2037         \IfEq{\ACM@cc@type}{by-nd}{Attribution-NoDerivatives}{}%
2038         \IfEq{\ACM@cc@type}{by-nc}{Attribution-NonCommercial}{}%
2039         \IfEq{\ACM@cc@type}{by-nc-sa}{Attribution-NonCommercial-ShareAlike}{}%
2040         \IfEq{\ACM@cc@type}{by-nc-nd}{Attribution-NonCommercial-NoDerivatives}{}%
2041         ~\IfEq{\ACM@cc@version}{4.0}{4.0 International}{3.0 Unported}%
2042       }
2043     License.}%
2044 \fi}

\copyrightyear By default, the copyright year is the same as \acmYear, but one can override this:
2045 \def\copyrightyear#1{\def\@copyrightyear{#1}}
2046 \copyrightyear{\@acmYear}

\@teaserfigures The teaser figures container
2047 \def\@teaserfigures{}

teaserfigure The teaser figure
2048 \newenvironment{teaserfigure}{\Collect@Body\@saveteaser}{}

\@saveteaser Saving the teaser
2049 \long\def\@saveteaser#1{\g@addto@macro\@teaserfigures{\@teaser{#1}}}

\thanks We redefine amsart \thanks so the anonymous key works
2050 \renewcommand{\thanks}[1]{%
2051   \@ifnotempty{#1}{%
2052     \if@ACM@anonymous
2053       \g@addto@macro\thankses{\thanks{A note}}%
2054     \else
2055       \g@addto@macro\thankses{\thanks{#1}}%
2056     \fi}}

\anon We provide \anon command, which blinds parts of the text if the package option
anonymous is set
2057 \newcommand{\anon}[2][ANONYMIZED]{%
2058   \if@ACM@anonymous%
2059     {\color{ACMOrange}#1}%
2060   \else%
2061     #2%
2062   \fi}

```

### 3.19 Maketitle hook

The current L<sup>A</sup>T<sub>E</sub>X provides a nice lthooks mechanism. However, since it is relatively new, we will use oldfashioned approach—at least for now.

`\@beginmaketitlehook` The hook

```
2063 \ifx\@beginmaketitlehook\@undefined
2064   \let\@beginmaketitlehook\@empty
2065 \fi
```

`\AtBeginMaketitle` Adding to the hook

```
2066 \def\AtBeginMaketitle{\g@addto@macro\@beginmaketitlehook}
```

### 3.20 ACM Engage top matter

`\@acmengagemetadadata` The special metadata for ACM engage course materials

```
2067 \def\@acmengagemetadadata{}
```

`\setengagemetadadata` Adding topic to engage metadata

```
2068 \def\setengagemetadadata#1#2{%
2069   \g@addto@macro{\@acmengagemetadadata}{%
2070     \setengagemetadadata{#1}{#2}}}
```

### 3.21 Typesetting top matter

`\mktitle@bx` Some of our formats use a two-column design. Some use a one-column design. In all cases we use a wide title. Thus we typeset the top matter in a special box to be used in the construction `\@twocolumn[⟨box⟩]`.

```
2071 \newbox\mktitle@bx
```

`\maketitle` The (in)famous `\maketitle`. Note that in sigchi-a mode, authors are *not* in the title box.

Another note: there is a subtle difference between author notes, title notes and thanks. The latter two refer to the paper itself and therefore belong to the copyright/permission block. By the way, this was the default behavior of the old ACM classes.

```
2072 \def\maketitle{\@beginmaketitlehook
2073   \@ACM@maketitle@typesettrue
2074   \if@ACM@anonymous
2075     % Anonymize omission of \author-s
2076     \ifnum\@authorgroups=0\author{}\fi
2077   \fi
2078   \begingroup
2079   \let\@vspace\@vspace@orig
2080   \let\@vspacer\@vspacer@orig
2081   \let\@footnotemark\@footnotemark@nolink
2082   \let\@footnotetext\@footnotetext@nolink
2083   \renewcommand\thefootnote{\@fnsymbol\c@footnote}%
2084   \hsize=\textwidth
2085   \def\@makefnmark{\hbox{\@textsuperscript{\@thefnmark}}}%
2086   \mktitle\if@ACM@sigchiamode\else\mkauthors\fi\mkteasers
2087   \@printtopmatter
2088   \if@ACM@sigchiamode\mkauthors\fi
```

```

2089 \setcounter{footnote}{0}%
2090 \def\@makefnmark{\hbox{\@textsuperscript{\normalfont\@thefnmark}}}%
2091 \@titlenotes
2092 \@subtitlenotes
2093 \@authornotes
2094 \let\@makefnmark\relax
2095 \let\@thefnmark\relax
2096 \let\@makefntext\noindent
2097 \ifx\@empty\thankses\else
2098   \footnotetextauthorsaddresses{%
2099     \def\par{\let\par\@par}\parindent\z@\@setthanks}%
2100   \fi
2101   \if@ACM@acmcp\else
2102     \ifx\@empty\@authorsaddresses\else
2103       \if@ACM@anonymous\else
2104         \if@ACM@journal@bibstrip
2105           \footnotetextauthorsaddresses{%
2106             \def\par{\let\par\@par}\parindent\z@\@setauthorsaddresses}%
2107         \fi
2108       \fi
2109     \fi
2110   \fi
2111   \if@ACM@nonacm
2112     \ifnum\acm@copyrightmode=15\relax % cc
2113       \footnotetextcopyrightpermission{\@copyrightpermission}%
2114     \fi
2115   \else
2116     \if@ACM@acmcp\else
2117       \footnotetextcopyrightpermission{%
2118         \if@ACM@authordraft
2119           \raisebox{-2ex}{\z@\z@{\makebox[0pt][l]{\large\bfseries
2120             Unpublished working draft. Not for distribution.}}}%
2121         \color[gray]{0.9}%
2122       \fi
2123       \parindent\z@\parskip0.1\baselineskip
2124       \if@ACM@authorversion\else
2125         \if@printpermission\@copyrightpermission\par\fi
2126       \fi
2127       \if@ACM@manuscript\else
2128         \if@ACM@journal@bibstrip\else % Print the conference information
2129           \if@ACM@engage
2130             {\itshape \@acmBooktitle, \@acmYear.}\par
2131           \else
2132             {\itshape \acmConference@shortname, \acmConference@date, \acmConference@venue}\par
2133           \fi
2134         \fi
2135       \fi
2136       \if@printcopyright
2137         \copyright\ \@copyrightyear\ \@copyrightowner\
2138       \else
2139         \@copyrightyear.\
2140       \fi
2141       \if@ACM@manuscript
2142         Manuscript submitted to ACM\

```

```

2143 \else
2144 \if@ACM@authorversion
2145 This is the author's version of the work. It is posted here for
2146 your personal use. Not for redistribution. The definitive Version
2147 of Record was published in
2148 \if@ACM@journal@bibstrip
2149 \emph{\@journalName}%
2150 \else
2151 \emph{\@acmBooktitle}%
2152 \fi
2153 \ifx\@acmDOI\@empty
2154 .
2155 \else
2156 , \@formatdoi{\@acmDOI}.
2157 \fi\
2158 \else
2159 \if@ACM@nonacm\else
2160 \if@ACM@journal@bibstrip
2161 \@permissionCodeOne/\@acmYear/\@acmMonth-ART\@acmArticle
2162 \ifx\@acmPrice\@empty\else\ $\@acmPrice\fi\
2163 \@formatdoi{\@acmDOI}%
2164 \else % Conference
2165 \ifx\@acmISBN\@empty\else ACM~ISBN~\@acmISBN
2166 \ifx\@acmPrice\@empty.\else\dots\$\@acmPrice\fi\\\fi
2167 \ifx\@acmDOI\@empty\else\@formatdoi{\@acmDOI}\fi%
2168 \fi
2169 \fi
2170 \fi
2171 \fi}%
2172 \fi
2173 \fi
2174 \endgroup
2175 \if@ACM@engage\@typesetengagemetadata\fi
2176 \setcounter{footnote}{0}%
2177 \@mkabstract
2178 \ifx\@translatedabstracts\@empty\else
2179 \@translatedabstracts\fi
2180 \if@ACM@printccs
2181 \ifx\@concepts\@empty\else\bgroup
2182 {\@specialsection{CCS Concepts}%
2183 \noindent\@concepts\par}\egroup
2184 \fi
2185 \fi
2186 \if@ACM@acmcp\else
2187 \ifx\@keywords\@empty\else\bgroup
2188 {\@specialsection{\keywordsname}%
2189 \noindent\@keywords\par}\egroup
2190 \fi
2191 \ifx\@translatedkeywords\@empty\else
2192 \@translatedkeywords
2193 \fi
2194 \fi
2195 \let\metadata@authors=\authors
2196 \xandlist{, }{, }{, }\metadata@authors

```

```

2197 \def\@ACM@checkaffil{%
2198 \hypersetup{%
2199   pdfauthor={\metadata@authors},
2200   pdftitle={\@title},
2201   pdfsubject={\@concepts},
2202   pdfkeywords={\@keywords},
2203   pdfcreator={LaTeX with acmart
2204     \csname ver@acmart.cls\endcsname\space
2205     and hyperref
2206     \csname ver@hyperref.sty\endcsname}}%
2207 \andify\authors
2208 \andify\shortauthors
2209 \global\let\authors=\authors
2210 \global\let\shortauthors=\shortauthors
2211 \if@ACM@printacmref
2212   \mkbibcitation
2213 \fi
2214 \global\@topnum\z@ % this prevents floats from falling
2215                   % at the top of page 1
2216 \global\@botnum\z@ % we do not want them to be on the bottom either
2217 \@printendtopmatter
2218 \@afterindentfalse
2219 \@afterheading
2220 \if@ACM@acmcp
2221   \set@ACM@acmcpbox
2222   \AtEndDocument{\end@ACM@color@frame}%
2223   \@ACM@color@frame
2224 \fi
2225 }

```

\set@ACM@acmcpbox Setting infobox for acmcp

```

2226 \newbox\@ACM@acmcpbox
2227 \def\set@ACM@acmcpbox{%
2228   \bgroup
2229   \hsize=5pc
2230   \global\setbox\@ACM@acmcpbox=\vtop to \textheight{%
2231     \setlength{\parindent}{\z@}%
2232     {\Large LOGO\par}%
2233     \scriptsize
2234     \vfill
2235     \ifx\@acmCodeDataLink\@empty\else
2236       Code and data links:\\ \@acmCodeDataLink\par\vfill
2237     \fi
2238     \ifx\@keywords\@empty\else Keywords:
2239     \@keywords\par\vfill
2240     \fi
2241     \ifx\@empty\@authorsaddresses\else\@setauthorsaddresses\vfill\fi
2242   }
2243 \egroup}

```

\@specialsection This macro starts sections for proceedings and uses \small for journals

```

2244 \def\@specialsection#1{%
2245   \let\@vspace\@vspace@orig
2246   \let\@vspacer\@vspacer@orig

```

```

2247 \ifcase\ACM@format@nr
2248 \relax % manuscript
2249 \par\medskip\small\noindent#1: %
2250 \or % acmsmall
2251 \par\medskip\small\noindent#1: %
2252 \or % acmlarge
2253 \par\medskip\small\noindent#1: %
2254 \or % acmtog
2255 \par\medskip\small\noindent#1: %
2256 \or % sigconf
2257 \section*{#1}%
2258 \or % siggraph
2259 \section*{#1}%
2260 \or % sigplan
2261 \noindentparagraph*{#1:~}%
2262 \or % sigchi
2263 \section*{#1}%
2264 \or % sigchi-a
2265 \section*{#1}%
2266 \or % acmengage
2267 \section*{#1}%
2268 \or % acmcp
2269 \section*{#1}%
2270 \fi
2271 \let\@vspace\@vspace@acm
2272 \let\@vspacer\@vspacer@acm
2273 }

```

\@printtopmatter The printing of top matter starts a new page and uses the given title box. Note that for sigchi-a we print badges here rather than in \mkttitle since we want them in the margins.

Note that if there are too many authors, \mkttitle@bx might overflow the page. Therefore we start with checking this and if this happens, we split the box and print it page by page.

```

2274 \def\@printtopmatter{%
2275 \ifx\@startPage\@empty
2276 \gdef\@startPage{1}%
2277 \else
2278 \setcounter{page}{\@startPage}%
2279 \fi
2280 \@tempdima=\ht\mkttitle@bx
2281 \advance\@tempdima by \dp\mkttitle@bx
2282 \ifdim\@tempdima>0.9\textheight
2283 \loop
2284 \setbox\@tempboxa=\vsplit \mkttitle@bx to 0.9\textheight
2285 \thispagestyle{firstpagestyle}%
2286 \noindent\unvbox\@tempboxa
2287 \clearpage
2288 \@tempdima=\ht\mkttitle@bx
2289 \advance\@tempdima by \dp\mkttitle@bx
2290 \ifdim\@tempdima>0.9\textheight\repeat
2291 \fi
2292 \thispagestyle{firstpagestyle}%
2293 \noindent

```

```

2294 \ifcase\ACM@format@nr
2295 \relax % manuscript
2296 \box\mktitle@bx\par
2297 \or % acmsmall
2298 \box\mktitle@bx\par
2299 \or % acmlarge
2300 \box\mktitle@bx\par
2301 \or % acmtog
2302 \twocolumn[\box\mktitle@bx]%
2303 \or % sigconf
2304 \twocolumn[\box\mktitle@bx]%
2305 \or % siggraph
2306 \twocolumn[\box\mktitle@bx]%
2307 \or % sigplan
2308 \twocolumn[\box\mktitle@bx]%
2309 \or % sigchi
2310 \twocolumn[\box\mktitle@bx]%
2311 \or % sigchi-a
2312 \par\box\mktitle@bx\par\bigskip
2313 \if@ACM@badge
2314 \marginpar{\noindent
2315 \ifx\@acmBadgeL@image\@empty\else
2316 \href{\@acmBadgeL@url}{%
2317 \includegraphics[width=\@ACM@badge@width]{\@acmBadgeL@image}}%
2318 \hskip\@ACM@badge@skip
2319 \fi
2320 \ifx\@acmBadgeR@image\@empty\else
2321 \href{\@acmBadgeR@url}{%
2322 \includegraphics[width=\@ACM@badge@width]{\@acmBadgeR@image}}%
2323 \fi}%
2324 \fi
2325 \or % acmengage
2326 \twocolumn[\box\mktitle@bx]%
2327 \or % acmcp
2328 \box\mktitle@bx\par
2329 \fi
2330 }

```

\@mktitle The title of the article

```

2331 \def\@mktitle{%
2332 \ifcase\ACM@format@nr
2333 \relax % manuscript
2334 \@mktitle@i
2335 \or % acmsmall
2336 \@mktitle@i
2337 \or % acmlarge
2338 \@mktitle@i
2339 \or % acmtog
2340 \@mktitle@i
2341 \or % sigconf
2342 \@mktitle@iii
2343 \or % siggraph
2344 \@mktitle@iii
2345 \or % sigplan

```

```

2346 \mktitle@iii
2347 \or % sigchi
2348 \mktitle@iii
2349 \or % sigchi-a
2350 \mktitle@iv
2351 \or % acmengage
2352 \mktitle@iii
2353 \or % acmcp
2354 \mktitle@i
2355 \fi
2356 }

```

\@titlefont The font to typeset the title

```

2357 \def\@titlefont{%
2358 \ifcase\ACM@format@nr
2359 \relax % manuscript
2360 \LARGE\sffamily\bfseries
2361 \or % acmsmall
2362 \LARGE\sffamily\bfseries
2363 \or % acmlarge
2364 \LARGE\sffamily\bfseries
2365 \or % acmtog
2366 \Huge\sffamily
2367 \or % sigconf
2368 \Huge\sffamily\bfseries
2369 \or % siggraph
2370 \Huge\sffamily\bfseries
2371 \or % sigplan
2372 \Huge\bfseries
2373 \or % sigchi
2374 \Huge\sffamily\bfseries
2375 \or % sigchi-a
2376 \Huge\bfseries
2377 \or % acmengage
2378 \Huge\sffamily\bfseries
2379 \or % acmcp
2380 \LARGE\sffamily\bfseries
2381 \fi}

```

\@subtitlefont The font to typeset the subtitle

```

2382 \def\@subtitlefont{\normalsize
2383 \ifcase\ACM@format@nr
2384 \relax % manuscript
2385 \mdseries
2386 \or % acmsmall
2387 \mdseries
2388 \or % acmlarge
2389 \mdseries
2390 \or % acmtog
2391 \LARGE
2392 \or % sigconf
2393 \LARGE\mdseries
2394 \or % siggraph
2395 \LARGE\mdseries

```

```

2396 \or % sigplan
2397     \LARGE\mdseries
2398 \or % sigchi
2399     \LARGE\mdseries
2400 \or % sigchi-a
2401     \mdseries
2402 \or % acmengage
2403     \LARGE\mdseries
2404 \or % acmcp
2405     \mdseries
2406 \fi}

```

\mktitle@i The version of \mktitle for most journals

```

2407 \def\mktitle@i{\hsize=\textwidth
2408   \if@ACM@acmcp
2409     \advance\hsize by -6pc%
2410   \fi
2411   \@ACM@title@width=\hsize
2412   \ifx\@acmBadgeL@image\@empty\else
2413     \advance\@ACM@title@width by -\@ACM@badge@width
2414     \advance\@ACM@title@width by -\@ACM@badge@skip
2415   \fi
2416   \ifx\@acmBadgeR@image\@empty\else
2417     \advance\@ACM@title@width by -\@ACM@badge@width
2418     \advance\@ACM@title@width by -\@ACM@badge@skip
2419   \fi
2420   \setbox\mktitle@bx=\vbox{\noindent\@titlefont
2421     \ifx\@acmBadgeL@image\@empty\else
2422       \raisebox{- .5\baselineskip}{\z@}{\z@}{\href{\@acmBadgeL@url}}{%
2423         \includegraphics[width=\@ACM@badge@width]{\@acmBadgeL@image}}}%
2424     \hskip\@ACM@badge@skip
2425   \fi
2426   \if@ACM@acmcp
2427     \vspace*{108.5\p@}\par\noindent
2428   \fi
2429   \parbox[t]{\@ACM@title@width}{\raggedright
2430     \@titlefont\noindent
2431     \@title\@translatedtitle%
2432   \ifx\@subtitle\@empty\else
2433     \par\noindent{\@subtitlefont\@subtitle\@translatedsubtitle}%
2434   \fi}%
2435   \ifx\@acmBadgeR@image\@empty\else
2436     \hskip\@ACM@badge@skip
2437     \raisebox{- .5\baselineskip}{\z@}{\z@}{\href{\@acmBadgeR@url}}{%
2438       \includegraphics[width=\@ACM@badge@width]{\@acmBadgeR@image}}}%
2439   \fi
2440   \par\bigskip}}%

```

\mktitle@ii The version of \mktitle for TOG. Since v1.06, this is subsumed by the \mktitle@i macro

\mktitle@iii The version of \mktitle for SIG proceedings. Note that since the title is centered, we leave space for the left badge even if only the right badge is defined.

```

2441 \def\mktitle@iii{\hsize=\textwidth

```

```

2442 \setbox\mktitle@bx=\vbox{\@titlefont\centering
2443 \@ACM@title@width=\hsize
2444 \if@ACM@badge
2445 \advance\@ACM@title@width by -2\@ACM@badge@width
2446 \advance\@ACM@title@width by -2\@ACM@badge@skip
2447 \parbox[b]{\@ACM@badge@width}{\strut
2448 \ifx\@acmBadgeL@image\@empty\else
2449 \raisebox{-.5\baselineskip}[\z@][\z@]{\href{\@acmBadgeL@url}{%
2450 \includegraphics[width=\@ACM@badge@width]{\@acmBadgeL@image}}}%
2451 \fi}%
2452 \hskip\@ACM@badge@skip
2453 \fi
2454 \parbox[t]{\@ACM@title@width}{\centering\@titlefont
2455 \@title\@translatedtitle%
2456 \ifx\@subtitle\@empty\else
2457 \par\noindent{\@subtitlefont\@subtitle\@translatedsubtitle}
2458 \fi
2459 }%
2460 \if@ACM@badge
2461 \hskip\@ACM@badge@skip
2462 \parbox[b]{\@ACM@badge@width}{\strut
2463 \ifx\@acmBadgeR@image\@empty\else
2464 \raisebox{-.5\baselineskip}[\z@][\z@]{\href{\@acmBadgeR@url}{%
2465 \includegraphics[width=\@ACM@badge@width]{\@acmBadgeR@image}}}%
2466 \fi}%
2467 \fi
2468 \par\bigskip}}%

```

\mktitle@iv The version of \mktitle for sigchi-a

```

2469 \def\mktitle@iv{\hsize=\textwidth
2470 \setbox\mktitle@bx=\vbox{\raggedright\leftskip5pc\@titlefont
2471 \noindent\leavevmode\leaders\hrule height 2pt\hfill\kern0pt\par
2472 \noindent\@title\@translatedtitle%
2473 \ifx\@subtitle\@empty\else
2474 \par\noindent\@subtitlefont\@subtitle\@translatedsubtitle%
2475 \fi
2476 \par\bigskip}}%

```

\@ACM@addtoaddress This macro adds an item to the address using the following rules:

1. If we start a paragraph, add the item
2. Otherwise, add a comma and the item
3. However, the comma is deleted if it is at the end of a line. We use the magic \cleaders trick for this.

```

2477 \newbox\@ACM@commabox
2478 \def\@ACM@addtoaddress#1{%
2479 \ifvmode\else
2480 \if@ACM@affiliation@obeypunctuation\else
2481 \setbox\@ACM@commabox=\hbox{, }%
2482 \unskip\cleaders\copy\@ACM@commabox\hskip\wd\@ACM@commabox
2483 \fi\fi
2484 #1}

```

```

\institution Theoretically we can define the macros for \affiliation inside the \@mkauthors-style
\position commands. However, this would lead to a strange error if an author uses them outside
\department \affiliation. Of course we can make them produce an error message, but...
\streetaddress 2485 \def\streetaddress#1{\unskip\ignorespaces}
\city 2486 \def\postcode#1{\unskip\ignorespaces}
\state 2487 \if@ACM@journal
\postcode 2488 \def\position#1{\unskip\ignorespaces}
\country 2489 \def\institution#1{\global\@ACM@instpresenttrue
2490 \unskip~#1\ignorespaces}
2491 \def\city#1{\global\@ACM@citypresenttrue\unskip\ignorespaces}
2492 \def\state#1{\unskip\ignorespaces}
2493 \newcommand\department[2][0]{\unskip\ignorespaces}
2494 \def\country#1{\StrDel{#1}{ }[\@tempa]}%
2495 \ifx\@tempa\empty\else
2496 \global\@ACM@countrypresenttrue\fi
2497 \if@ACM@affiliation@obexpunctuation\else, \fi#1\ignorespaces}
2498 \else
2499 \def\position#1{\if@ACM@affiliation@obexpunctuation#1\else#1\par\fi}%
2500 \def\institution#1{\global\@ACM@instpresenttrue
2501 \if@ACM@affiliation@obexpunctuation#1\else#1\par\fi}%
2502 \newcommand\department[2][0]{\if@ACM@affiliation@obexpunctuation
2503 #2\else#2\par\fi}%
2504 % \def\streetaddress#1{\if@ACM@affiliation@obexpunctuation#1\else#1\par\fi}%
2505 \def\city#1{\global\@ACM@citypresenttrue\@ACM@addtoaddress{#1}}%
2506 \let\state\@ACM@addtoaddress
2507 % \def\postcode#1{\if@ACM@affiliation@obexpunctuation#1\else\unskip\space#1\fi}%
2508 \def\country#1{\global\@ACM@countrypresenttrue\@ACM@addtoaddress{#1}}%
2509 \fi

\@mkauthors Typesetting the authors
2510 \def\@mkauthors{\begingroup
2511 \hsize=\textwidth
2512 \ifcase\ACM@format@nr
2513 \relax % manuscript
2514 \@mkauthors@i
2515 \or % acmsmall
2516 \@mkauthors@i
2517 \or % acmlarge
2518 \@mkauthors@i
2519 \or % acmtog
2520 \@mkauthors@i
2521 \or % sigconf
2522 \@mkauthors@iii
2523 \or % siggraph
2524 \@mkauthors@iii
2525 \or % sigplan
2526 \@mkauthors@iii
2527 \or % sigchi
2528 \@mkauthors@iii
2529 \or % sigchi-a
2530 \@mkauthors@iv
2531 \or % acmengage
2532 \@mkauthors@iii
2533 \or % acmcp

```

```

2534 \mkauthors@i
2535 \fi
2536 \endgroup
2537 }

```

\@authorfont Somehow different conferences use different fonts for author names. Why?

```

2538 \def\@authorfont{\Large\sffamily}

```

\@affiliationfont Font for affiliations

```

2539 \def\@affiliationfont{\normalsize\normalfont}

```

#### Adjusting fonts for different formats

```

2540 \ifcase\ACM@format@nr
2541 \relax % manuscript
2542 \or % acmsmall
2543 \def\@authorfont{\large\sffamily}
2544 \def\@affiliationfont{\small\normalfont}
2545 \or % acmlarge
2546 \or % acmtog
2547 \def\@authorfont{\LARGE\sffamily}
2548 \def\@affiliationfont{\large}
2549 \or % sigconf
2550 \def\@authorfont{\LARGE}
2551 \def\@affiliationfont{\large}
2552 \or % siggraph
2553 \def\@authorfont{\normalsize\normalfont}
2554 \def\@affiliationfont{\normalsize\normalfont}
2555 \or % sigplan
2556 \def\@authorfont{\Large\normalfont}
2557 \def\@affiliationfont{\normalsize\normalfont}
2558 \or % sigchi
2559 \def\@authorfont{\bfseries}
2560 \def\@affiliationfont{\mdseries}
2561 \or % sigchi-a
2562 \def\@authorfont{\bfseries}
2563 \def\@affiliationfont{\mdseries}
2564 \or % acmengage
2565 \def\@authorfont{\LARGE}
2566 \def\@affiliationfont{\large}
2567 \or % acmcp
2568 \def\@authorfont{\large\sffamily}
2569 \def\@affiliationfont{\small\normalfont}
2570 \fi

```

\@typeset@author@line At this point we have \@currentauthors and \@currentaffiliations. We typeset them in the journal style

```

2571 \def\@typeset@author@line{%
2572 \andify\@currentauthors\par\noindent
2573 \@currentauthors\def\@currentauthors{}%
2574 \ifx\@currentaffiliations\empty\else
2575 \andify\@currentaffiliations
2576 \unskip, {\@currentaffiliations}\par
2577 \fi
2578 \def\@currentaffiliations{}}

```

```

\if@ACM@instpresent Whether the given affiliation has institution
2579 \newif\if@ACM@instpresent
2580 \@ACM@instpresenttrue

\if@ACM@citypresent Whether the given affiliation has city
2581 \newif\if@ACM@citypresent
2582 \@ACM@citypresenttrue

\if@ACM@countrypresent Whether the given affiliation has country
2583 \newif\if@ACM@countrypresent
2584 \@ACM@countrypresenttrue

\@ACM@resetaffil Reset affiliation flags
2585 \def\@ACM@resetaffil{%
2586   \global\@ACM@instpresentfalse
2587   \global\@ACM@citypresentfalse
2588   \global\@ACM@countrypresentfalse
2589 }

\@ACM@checkaffil Check affiliation flags
2590 \def\@ACM@checkaffil{%
2591   \if@ACM@instpresent\else
2592     \ClassWarningNoLine{\@classname}{No institution present for an affiliation}%
2593     \fi
2594   \if@ACM@citypresent\else
2595     \ClassWarningNoLine{\@classname}{No city present for an affiliation}%
2596     \fi
2597   \if@ACM@countrypresent\else
2598     \ClassError{\@classname}{No country present for an affiliation}{ACM
2599     requires each author to indicate their country using country macro.}%
2600     \fi
2601 }

\@mkauthors@i This version is used in most journal formats. Note that \and between authors with the
same affiliation becomes _and_:
2602 \def\@mkauthors@i{%
2603   \def\@currentauthors{}%
2604   \def\@currentaffiliations{}%
2605   \global\let\and\@typeset@author@line
2606   \def\@author##1{%
2607     \ifx\@currentauthors\@empty
2608       \gdef\@currentauthors{\@authorfont\MakeTextUppercase{##1}}%
2609     \else
2610       \g@addto@macro{\@currentauthors}{\and\MakeTextUppercase{##1}}%
2611     \fi
2612     \gdef\and{}}%
2613   \def\email##1##2{%
2614     \def\affiliation##1##2{%
2615       \def\@tempa{##2}\ifx\@tempa\@empty\else
2616         \ifx\@currentaffiliations\@empty
2617           \gdef\@currentaffiliations{%
2618             \setkeys{@ACM@affiliation@}{obeypunctuation=false}%
2619             \setkeys{@ACM@affiliation@}{##1}}%

```

```

2620         \@ACM@resetaffil
2621         \@affiliationfont##2\@ACM@checkaffil}%
2622     \else
2623         \g@addto@macro{\@currentaffiliations}{\and
2624         \setkeys{ACM@affiliation@}{obeypunctuation=false}%
2625         \setkeys{ACM@affiliation@}{##1}\@ACM@resetaffil
2626         ##2\@ACM@checkaffil}%
2627     \fi
2628 \fi
2629 \global\let\and\@typeset@author@line}%
2630 \if@ACM@acmcp
2631     \advance\hsize by -6pc%
2632 \fi
2633 \global\setbox\mktitle@bx=\vbox{\noindent\unvbox\mktitle@bx\par\medskip
2634     \noindent\addresses\@typeset@author@line
2635     \par\medskip}%
2636 }

```

\mkauthors@ii The \mkauthors@ii command was the version used in acmtog. It is no longer necessary.

\author@bx The box to put an individual author in

```
2637 \newbox\author@bx
```

\author@bx@wd The width of the author box

```
2638 \newdimen\author@bx@wd
```

\author@bx@sep The separation between author boxes

```
2639 \newskip\author@bx@sep
```

```
2640 \author@bx@sep=1pc\relax
```

\@typeset@author@bx Typesetting the box with authors. Note that in sigchi-a the box is not centered.

```

2641 \def\@typeset@author@bx{\bgroup\hsize=\author@bx@wd
2642 \def\and{\par}\normalbaselines
2643 \global\setbox\author@bx=\vtop{\if@ACM@sigchiamode\else\centering\fi
2644     \@authorfont\@currentauthors\par\@affiliationfont
2645     \@currentaffiliation}\egroup
2646 \box\author@bx\hspace{\author@bx@sep}%
2647 \gdef\@currentauthors{}}%
2648 \gdef\@currentaffiliation{}}

```

\mkauthors@iii The sigconf version. Here we use a centered design with each author in a separate box.

```
2649 \def\mkauthors@iii{%
```

First, we need to determine the design of the author strip. The boxes are separated by \author@bx@sep plus two \author@bx@sep margins. This means that each box must be of width  $(\text{textwidth} - \text{author@bx@sep})/N - \text{author@bx@sep}$ , where  $N$  is the number of boxes per row.

```

2650 \author@bx@wd=\textwidth\relax
2651 \advance\author@bx@wd by -\author@bx@sep\relax
2652 \ifnum\@ACM@authorsperrrow>0\relax
2653     \divide\author@bx@wd by \@ACM@authorsperrrow\relax
2654 \else
2655     \ifcase\num@authorgroups

```

```

2656 \relax % 0?
2657 \or % 1=one author per row
2658 \or % 2=two authors per row
2659 \divide\author@bx@wd by \num@authorgroups\relax
2660 \or % 3=three authors per row
2661 \divide\author@bx@wd by \num@authorgroups\relax
2662 \or % 4=two authors per row (!)
2663 \divide\author@bx@wd by 2\relax
2664 \else % three authors per row
2665 \divide\author@bx@wd by 3\relax
2666 \fi
2667 \fi
2668 \advance\author@bx@wd by -\author@bx@sep\relax
Now, parsing of \addresses:
2669 \gdef\@currentauthors{}%
2670 \gdef\@currentaffiliation{}%
2671 \def\@author##1{\ifx\@currentauthors\@empty
2672 \gdef\@currentauthors{\par##1}%
2673 \else
2674 \g@addto@macro\@currentauthors{\par##1}%
2675 \fi
2676 \gdef\and{}}%
2677 \def\email##1##2{\ifx\@currentaffiliation\@empty
2678 \gdef\@currentaffiliation{\bgroup
2679 \mathchardef\UrlBreakPenalty=10000\nolinkurl{##2}\egroup}%
2680 \else
2681 \g@addto@macro\@currentaffiliation{\par\bgroup
2682 \mathchardef\UrlBreakPenalty=10000\nolinkurl{##2}\egroup}%
2683 \fi}%
2684 \def\affiliation##1##2{\ifx\@currentaffiliation\@empty
2685 \gdef\@currentaffiliation{%
2686 \setkeys{@ACM@affiliation@}{obexpunctuation=false}%
2687 \setkeys{@ACM@affiliation@}{##1}\@ACM@resetaffil
2688 ##2\@ACM@checkaffil}%
2689 \else
2690 \g@addto@macro\@currentaffiliation{\par
2691 \setkeys{@ACM@affiliation@}{obexpunctuation=false}%
2692 \setkeys{@ACM@affiliation@}{##1}\@ACM@resetaffil
2693 ##2\@ACM@checkaffil}%
2694 \fi
2695 \global\let\and\@typeset@author@bx
2696 }%
Actual typesetting is done by the \and macro:
2697 \hsize=\textwidth
2698 \global\setbox\mktitle@bx=\vbox{\noindent
2699 \unvbox\mktitle@bx\par\medskip\leavevmode
2700 \lineskip=1pc\relax\centering\hspace*{-1em}%
2701 \addresses\let\and\@typeset@author@bx\and\par\bigskip}}

```

\@mkauthors@iv The sigchi-a version. We put authors in the main text with no more than 2 authors per line, unless overridden.

```

2702 \def\@mkauthors@iv{%

```

First, we need to determine the design of the author strip. The boxes are separated by `\author@bx@sep` plus two `\author@bx@sep` margins. This means that each box must be of width  $(\text{\textwidth} - \text{\author@bx@sep})/N - \text{\author@bx@sep}$ , where  $N$  is the number of boxes per row.

```

2703 \author@bx@wd=\columnwidth\relax
2704 \advance\author@bx@wd by -\author@bx@sep\relax
2705 \ifnum\@ACM@authorsperrrow>0\relax
2706   \divide\author@bx@wd by \@ACM@authorsperrrow\relax
2707 \else
2708   \ifcase\num@authorgroups
2709     \relax % 0?
2710   \or % 1=one author per row
2711   \else % 2=two authors per row
2712     \divide\author@bx@wd by 2\relax
2713   \fi
2714 \fi
2715 \advance\author@bx@wd by -\author@bx@sep\relax

```

Now, parsing of `\addresses`:

```

2716 \gdef\@currentauthors{}%
2717 \gdef\@currentaffiliation{}%
2718 \def\author##1{\ifx\@currentauthors\@empty
2719   \gdef\@currentauthors{\par##1}%
2720 \else
2721   \g@addto@macro\@currentauthors{\par##1}%
2722 \fi
2723 \gdef\and{}}%
2724 \def\email##1##2{\ifx\@currentaffiliation\@empty
2725   \gdef\@currentaffiliation{\nolinkurl{##2}}%
2726 \else
2727   \g@addto@macro\@currentaffiliation{\par\nolinkurl{##2}}%
2728 \fi}%
2729 \def\affiliation##1##2{\ifx\@currentaffiliation\@empty
2730   \gdef\@currentaffiliation{%
2731     \setkeys{@ACM@affiliation@}{obeypunctuation=false}%
2732     \setkeys{@ACM@affiliation@}{##1}\@ACM@resetaffil
2733     ##2\@ACM@checkaffil}%
2734 \else
2735   \g@addto@macro\@currentaffiliation{\par
2736     \setkeys{@ACM@affiliation@}{obeypunctuation=false}%
2737     \setkeys{@ACM@affiliation@}{##1}\@ACM@resetaffil
2738     ##2\@ACM@checkaffil}%
2739 \fi
2740 \global\let\and\@typeset@author@bx}%
2741 %

```

Actual typesetting is done by the `\and` macro

```

2742 \bgroup\hsize=\columnwidth
2743 \par\raggedright\leftskip=\z@
2744 \lineskip=1pc\noindent
2745 \addresses\let\and\@typeset@author@bx\and\par\bigskip\egroup}

```

`\@mkauthorsaddresses` Typesetting authors' addresses in the footnote style

```

2746 \def\@mkauthorsaddresses{%

```

```

2747 \ifnum\num@authors>1\relax
2748 Authors' \else Author's \fi
2749 \ifnum\num@authorgroups>1\relax
2750 addresses: \else address: \fi
2751 \bgroup
2752 \def\streetaddress##1{\unskip, ##1}%
2753 \def\postcode##1{\unskip, ##1}%
2754 \def\position##1{\unskip\ignorespaces}%
2755 \gdef\@ACM@institution@separator{,}%
2756 \def\institution##1{\unskip\@ACM@institution@separator ##1\gdef\@ACM@institution@separator{ and }}
2757 \def\city##1{\unskip, ##1}%
2758 \def\state##1{\unskip, ##1}%
2759 \renewcommand\department[2][0]{\unskip\@addpunct, ##2}%
2760 \def\country##1{\unskip, ##1}%
2761 \def\and{\unskip; \gdef\@ACM@institution@separator{,}}%
2762 \def\@author##1{##1}%
2763 \def\email##1##2{\unskip, \nolinkurl{##2}}%
2764 \addresses
2765 \egroup}

2766 \AtEndDocument{\if@ACM@nonacm\else\if@ACM@journal
2767 \ifx\@authorsaddresses\@empty
2768 \ClassWarningNoLine{\@classname}{Authors'
2769 addresses are mandatory for ACM journals}%
2770 \fi\fi\fi}

```

\@setaddresses This is an amsart macro that we do not need.

```
2771 \def\@setaddresses{}
```

\@authornotemark Adding a footnote mark to authors. This version adds a “normal” footnote mark.

```
2772 \def\@authornotemark{\g@addto@macro\@currentauthors{\footnotemark\relax}}
```

\@@authornotemark Adding a footnote mark to authors with a given number

```
2773 \def\@@authornotemark#1{\g@addto@macro\@currentauthors{\footnotemark[#1]}}
```

\@mkteasers Typesetting the teasers

```

2774 \def\@mkteasers{%
2775 \ifx\@teaserfigures\@empty\else
2776 \def\@teaser##1{\par\bigskip\bgroup
2777 \captionsetup{type=figure}##1\egroup\par}
2778 \global\setbox\mktitle@bx=\vbox{\noindent\unvbox\mktitle@bx\par
2779 \noindent\@Description@presentfalse
2780 \@teaserfigures\par\if@Description@present\else
2781 \global\@undescrbed@imagestrue
2782 \ClassWarning{\@classname}{A possible image without
2783 description}\fi
2784 \medskip}%
2785 \fi}

```

\@mkabstract Typesetting the abstract

```

2786 \def\@mkabstract{\bgroup
2787 \ifx\@abstract\@empty\else
2788 {\phantomsection\addcontentsline{toc}{section}{\abstractname}%
2789 \if@ACM@journal

```

```

2790     \everypar{\setbox\z@\lastbox\everypar{}}\small
2791     \else
2792       \section*{\abstractname}%
2793     \fi
2794     \ignorespaces\@abstract\par}%
2795   \fi\egroup}

```

\@mktranslatedabstract Typesetting a translated abstract

```

2796 \def\@mktranslatedabstract#1{\selectlanguage{#1}%
2797   \if@ACM@journal
2798     \everypar{\setbox\z@\lastbox\everypar{}}\small
2799   \else
2800     \section*{\abstractname}%
2801   \fi
2802   \ignorespaces}

```

\@mkbibcitation Print the bibcitation format

```

2803 \def\@mkbibcitation{\bgroup
2804   \let\@vspace\@vspace@orig
2805   \let\@vspacer\@vspacer@orig
2806   \def\@pages@word{\ifnum\getrefnumber{TotPages}=1\relax page\else pages\fi}%
2807   \def\footnotemark{}%
2808   \def\unskip{\unskip} \ignorespaces}%
2809   \def\footnote{\ClassError{\@classname}{Please do not use footnotes
2810     inside a \string\title{} or \string\author{} command! Use
2811     \string\titlenote{} or \string\authornote{} instead!}}%
2812   \def\@article@string{\ifx\@acmArticle\@empty{\ } \else,
2813     Article~\@acmArticle\ } \fi}%
2814   \par\medskip\small\noindent{\bfseries ACM Reference Format:}\par\nobreak
2815   \noindent\bgroup
2816     \def\unskip{\unskip}, \ignorespaces\authors\egroup. \@acmYear. \@title
2817     \ifx\@subtitle\@empty. \else: \@subtitle. \fi
2818     \if@ACM@nonacm\else
2819       % The 'nonacm' option disables 'printacmref' by default,
2820       % and the present \@mkbibcitation definition is never used
2821       % in this case. The conditional remains useful if the user
2822       % explicitly sets \settopmatter{printacmref=true}.
2823       \if@ACM@journal@bibstrip
2824         \textit{\@journalNameShort}
2825         \@acmVolume, \@acmNumber \@article@string (\@acmPubDate),
2826         \ref{TotPages}~\@pages@word.
2827       \else
2828         In \textit{\@acmBooktitle}%
2829         \ifx\@acmEditors\@empty\textit{.}\else
2830           \andify\@acmEditors\textit{, }\@acmEditors~\@editorsAbbrev.%
2831         \fi\
2832         ACM, New York, NY, USA%
2833         \@article@string\unskip, \ref{TotPages}~\@pages@word.
2834       \fi
2835     \fi
2836     \ifx\@acmDOI\@empty\else\@formatdoi{\@acmDOI}\fi
2837   \par\egroup}

```

\@printendtopmatter End the top matter

```

2838 \def\@printendtopmatter{%
2839   \let\@vspace\@vspace@orig
2840   \let\@vspacer\@vspacer@orig
2841   \par\bigskip
2842   \let\@vspace\@vspace@acm
2843   \let\@vspacer\@vspacer@acm
2844 }

```

\@setthanks We redefine \@setthanks using \long

```

2845 \def\@setthanks{\long\def\thanks##1{\par##1\@addpunct.}\thankses}

```

\@setauthorsaddresses

```

2846 \def\@setauthorsaddresses{\@authorsaddresses\unskip\@addpunct.}

```

\@typesetengagemetadata Typesetting special metadata for ACM Engage

```

2847 \def\@typesetengagemetadata{%
2848   \def\@setengagemetadata##1##2{\par\noindent\textbf{##1} ##2\par}%
2849   \@acmengagemetadata}

```

### 3.22 Headers and Footers

We use fancyhdr for our headers and footers:

```

2850 \RequirePackage{fancyhdr}

```

\ACM@restore@pagestyle The following code by Ross Moore protects against changes by the totpages package:

```

2851 \let\ACM@ps@plain\ps@plain
2852 \let\ACM@ps@myheadings\ps@myheadings
2853 \let\ACM@ps@headings\ps@headings
2854 \def\ACM@restore@pagestyle{%
2855   \let\ps@plain\ACM@ps@plain
2856   \let\ps@myheadings\ACM@ps@myheadings
2857   \let\ps@headings\ACM@ps@headings}
2858 \AtBeginDocument{\ACM@restore@pagestyle}

```

\ACM@linecount@bx This is the box displayed in review mode

```

2859 \if@ACM@review
2860   \newsavebox{\ACM@linecount@bx}
2861   \newlength\ACM@linecount@bxht
2862   \newcount\ACM@linecount
2863   \ACM@linecount\@ne\relax
2864   \def\ACM@mk@linecount{%
2865     \savebox{\ACM@linecount@bx}[4em][t]{\parbox[t]{4em}{\normalfont
2866       \normalsize
2867       \setlength{\ACM@linecount@bxht}{0pt}%
2868       \loop{\color{red}\scriptsize\the\ACM@linecount}\@
2869       \global\advance\ACM@linecount by \@ne
2870       \addtolength{\ACM@linecount@bxht}{\baselineskip}%
2871       \ifdim\ACM@linecount@bxht<\textheight\repeat
2872       {\color{red}\scriptsize\the\ACM@linecount}\hfill
2873       \global\advance\ACM@linecount by \@ne}}}
2874 \fi

```

\ACM@linecountL How to display the box on the left

```
2875 \def\ACM@linecountL{%
2876   \if@ACM@review
2877   \ACM@mk@linecount
2878   \begin{picture}(0,0)%
2879     \put(-26,-22){\usebox{\ACM@linecount@bx}}%
2880   \end{picture}%
2881   \fi}
```

\ACM@linecountR How to display the box on the right. In one column formats we do not step the numbers.

```
2882 \def\ACM@linecountR{%
2883   \if@ACM@review
2884     \ifcase\ACM@format@nr
2885       \relax % manuscript
2886       \relax
2887       \or % acmsmall
2888       \relax
2889       \or % acmlarge
2890       \relax
2891       \or % acmtog
2892       \ACM@mk@linecount
2893       \or % sigconf
2894       \ACM@mk@linecount
2895       \or % siggraph
2896       \ACM@mk@linecount
2897       \or % sigplan
2898       \ACM@mk@linecount
2899       \or % sigchi
2900       \ACM@mk@linecount
2901       \or % sigchi-a
2902       \ACM@mk@linecount
2903       \or % acmengage
2904       \ACM@mk@linecount
2905       \or % acmcp
2906       \relax
2907   \fi
2908   \begin{picture}(0,0)%
2909     \put(20,-22){\usebox{\ACM@linecount@bx}}%
2910   \end{picture}%
2911   \fi}
```

\ACM@timestamp The timestamp system

```
2912 \if@ACM@timestamp
2913 % Subtracting 30 from \time gives us the effect of rounding down despite
2914 % \numexpr rounding to nearest
2915 \newcounter{ACM@time@hours}
2916 \setcounter{ACM@time@hours}{\numexpr (\time - 30) / 60 \relax}
2917 \newcounter{ACM@time@minutes}
2918 \setcounter{ACM@time@minutes}{\numexpr \time - \theACM@time@hours * 60 \relax}
2919 \newcommand\ACM@timestamp{%
2920   \footnotesize%
2921   \ifx\@acmSubmissionID\@empty\relax\else
2922     Submission ID: \@acmSubmissionID.{ }%
2923   \fi}
```

```

2924 \the\year-\two@digits{\the\month}-\two@digits{\the\day}{ }%
2925 \two@digits{\theACM@time@hours}:\two@digits{\theACM@time@minutes}{. }%
2926 Page \thepage\ of \@startPage--\pageref*{TotPages}.%
2927 }
2928 \fi

```

\@shortauthors Even if the author redefined \@shortauthors, we do not print it in the headers when in anonymous mode:

```

2929 \def\@shortauthors{%
2930 \if@ACM@anonymous
2931 Anon.
2932 \ifx\@acmSubmissionID\@empty\else Submission Id: \@acmSubmissionID\fi
2933 \else\@shortauthors\fi}

```

\@headfootfont The font to typeset header and footer text.

```

2934 \def\@headfootfont{\sffamily\footnotesize}

```

standardpagestyle The page style for all pages but the first one    The page style for all pages but the first one

```

2935 \AtBeginDocument{%
2936 \fancypagestyle{standardpagestyle}{%
2937 \fancyhf{}%
2938 \renewcommand{\headrulewidth}{\z@}%
2939 \renewcommand{\footrulewidth}{\z@}%
2940 \def\@acmArticlePage{%
2941 \ifx\@acmArticle\empty%
2942 \if@ACM@printfolios\thepage\fi%
2943 \else%
2944 \acmArticle\if@ACM@printfolios:\thepage\fi%
2945 \fi%
2946 }%
2947 \if@ACM@journal@bibstrip
2948 \ifcase\ACM@format@nr
2949 \relax % manuscript
2950 \fancyhead[LE]{\ACM@linecountL\if@ACM@printfolios\thepage\fi}%
2951 \fancyhead[RO]{\if@ACM@printfolios\thepage\fi}%
2952 \fancyhead[RE]{\@shortauthors}%
2953 \fancyhead[LO]{\ACM@linecountL\shorttitle}%
2954 \if@ACM@nonacm\else%
2955 \fancyfoot[RO,LE]{\footnotesize Manuscript submitted to ACM}
2956 \fi%
2957 \or % acmsmall
2958 \fancyhead[LE]{\ACM@linecountL\@headfootfont\@acmArticlePage}%
2959 \fancyhead[RO]{\@headfootfont\@acmArticlePage}%
2960 \fancyhead[RE]{\@headfootfont\@shortauthors}%
2961 \fancyhead[LO]{\ACM@linecountL\@headfootfont\shorttitle}%
2962 \if@ACM@nonacm\else%
2963 \fancyfoot[RO,LE]{\footnotesize \@journalNameShort, Vol. \@acmVolume, No.
2964 \@acmNumber, Article \@acmArticle. Publication date: \@acmPubDate.}%
2965 \fi
2966 \or % acmlarge
2967 \fancyhead[LE]{\ACM@linecountL\@headfootfont
2968 \acmArticlePage\quad\textbullet\quad\@shortauthors}%
2969 \fancyhead[LO]{\ACM@linecountL}%

```

```

2970 \fancyhead[RO]{\@headfootfont
2971 \shorttitle\quad\textbullet\quad\@acmArticlePage}%
2972 \if@ACM@nonacm\else%
2973 \fancyfoot[RO,LE]{\footnotesize \@journalNameShort, Vol. \@acmVolume, No.
2974 \@acmNumber, Article \@acmArticle. Publication date: \@acmPubDate.}%
2975 \fi
2976 \or % acmtog
2977 \fancyhead[LE]{\ACM@linecountL\@headfootfont
2978 \@acmArticlePage\quad\textbullet\quad\@shortauthors}%
2979 \fancyhead[LO]{\ACM@linecountL}%
2980 \fancyhead[RE]{\ACM@linecountR}%
2981 \fancyhead[RO]{\@headfootfont
2982 \shorttitle\quad\textbullet\quad\@acmArticlePage\ACM@linecountR}%
2983 \if@ACM@nonacm\else%
2984 \fancyfoot[RO,LE]{\footnotesize \@journalNameShort, Vol. \@acmVolume, No.
2985 \@acmNumber, Article \@acmArticle. Publication date: \@acmPubDate.}%
2986 \fi
2987 \else % Proceedings
2988 \fancyfoot[C]{\if@ACM@printfolios\footnotesize\thepage\fi}%
2989 \fancyhead[LO]{\ACM@linecountL\@headfootfont\shorttitle}%
2990 \fancyhead[RE]{\@headfootfont\@shortauthors\ACM@linecountR}%
2991 \if@ACM@nonacm
2992 \fancyhead[LE]{\ACM@linecountL}%
2993 \fancyhead[RO]{\ACM@linecountR}%
2994 \else%
2995 \if@ACM@engage
2996 \fancyhead[LE]{\ACM@linecountL\@headfootfont\footnotesize
2997 EngageCSEdu. \ifx\@acmDOI\@empty\else\@formatdoi{\@acmDOI}\fi}%
2998 \fancyhead[RO]{\@headfootfont
2999 EngageCSEdu. \ifx\@acmDOI\@empty\else\@formatdoi{\@acmDOI}\fi
3000 \ACM@linecountR}%
3001 \else
3002 \fancyhead[LE]{\ACM@linecountL\@headfootfont\footnotesize
3003 \acmConference@shortname,
3004 \acmConference@date, \acmConference@venue}%
3005 \fancyhead[RO]{\@headfootfont
3006 \acmConference@shortname,
3007 \acmConference@date, \acmConference@venue\ACM@linecountR}%
3008 \fi
3009 \fi
3010 \fi
3011 \else % Proceedings
3012 \fancyfoot[C]{\if@ACM@printfolios\footnotesize\thepage\fi}%
3013 \fancyhead[LO]{\ACM@linecountL\@headfootfont\shorttitle}%
3014 \fancyhead[RE]{\@headfootfont\@shortauthors\ACM@linecountR}%
3015 \if@ACM@nonacm
3016 \fancyhead[LE]{\ACM@linecountL}%
3017 \fancyhead[RO]{\ACM@linecountR}%
3018 \else%
3019 \if@ACM@engage
3020 \fancyhead[LE]{\ACM@linecountL\@headfootfont
3021 EngageCSEdu. \ifx\@acmDOI\@empty\else\@formatdoi{\@acmDOI}\fi}%
3022 \fancyhead[RO]{\@headfootfont
3023 EngageCSEdu. \ifx\@acmDOI\@empty\else\@formatdoi{\@acmDOI}\fi

```

```

3024         \ACM@linecountR}%
3025     \else
3026         \fancyhead[LE]{\ACM@linecountL\@headfootfont
3027             \acmConference@shortname,
3028             \acmConference@date, \acmConference@venue}%
3029         \fancyhead[RO]{\@headfootfont
3030             \acmConference@shortname,
3031             \acmConference@date, \acmConference@venue\ACM@linecountR}%
3032     \fi
3033 \fi
3034 \fi
3035 \if@ACM@sigchiamode
3036     \fancyheadoffset[L]{\dimexpr(\marginparsep+\marginparwidth)}%
3037 \fi
3038 \if@ACM@timestamp
3039     \fancyfoot[LO,RE]{\ACM@timestamp}
3040 \fi
3041 \if@ACM@acmcp
3042     \renewcommand{\footrulewidth}{0.1\p@}%
3043     \fancyheadoffset[L]{46pt}%
3044     \fancyhead[L]{\makebox[\z@][l]{%
3045         \raisebox{-\dimexpr(0.25\textheight*\ACM@ArticleType@nr)}{%
3046             \rotatebox{90}{\colorbox{@ACM@Article@color}{\color{white}%
3047                 \strut\ACM@ArticleType~Article}}}%
3048         \ACM@linecountL}%
3049     \fancyhead[R]{\makebox[\z@][r]{\box\@ACM@acmcpbox}}%
3050     \fancyfoot[L,C]{}%
3051     \fancyfoot[R]{\footnotesize
3052         \@journalName, Volume~\@acmVolume, Issue~\@acmNumber,
3053         \ifx\@acmArticle\@empty\else Article~\@acmArticle\fi\space
3054         (\@acmPubDate)\ifx\@acmDOI\@empty\else\\@formatdoi{\@acmDOI}\fi}
3055 \fi
3056 }%
3057 \pagestyle{standardpagestyle}
3058 }

```

\@folio@wd Folio blob width, height, offsets and max number

```

\@folio@ht 3059 \newdimen\@folio@wd
\@folio@voffset 3060 \@folio@wd=\z@
\@folio@max 3061 \newdimen\@folio@ht
3062 \@folio@ht=\z@
3063 \newdimen\@folio@voffset
3064 \@folio@voffset=\z@
3065 \def\@folio@max{1}
3066 \ifcase\ACM@format@nr
3067 \relax % manuscript
3068 \or % acmsmall
3069     \@folio@wd=45.75pt\relax
3070     \@folio@ht=1.25in\relax
3071     \@folio@voffset=.2in\relax
3072     \def\@folio@max{8}
3073 \or % acmlarge
3074     \@folio@wd=43.25pt\relax
3075     \@folio@ht=79pt\relax

```

```

3076 \@folio@voffset=.55in\relax
3077 \def\@folio@max{10}
3078 \fi

```

`\@folioblob` The macro to typeset the folio blob.

```

3079 \def\@folioblob{\@tempcnta=0\@acmArticleSeq\relax
3080 \ifnum\@tempcnta=0\relax\else
First, we calculate \@acmArticleSeq modulo \@folio@max
3081 \loop
3082 \ifnum\@tempcnta>\@folio@max\relax
3083 \advance\@tempcnta by - \@folio@max
3084 \repeat
3085 \advance\@tempcnta by -1\relax
3086 \@tempdima=\@folio@ht\relax
3087 \multiply\@tempdima by \the\@tempcnta\relax
3088 \advance\@tempdima by -\@folio@voffset\relax
3089 \begin{picture}(0,0)
3090 \makebox[\z@]{\raisebox{-\@tempdima}{%
3091 \rlap{%
3092 \raisebox{-0.45\@folio@ht}{\z@}{\z@}{%
3093 \rule{\@folio@wd}{\@folio@ht}}}%
3094 \parbox{\@folio@wd}{%
3095 \centering
3096 \textcolor{white}{\LARGE\sffamily\bfseries\@acmArticle}}}}
3097 \end{picture}\fi}
3098

```

`firstpagestyle` The page style for the first page only.

```

3099 \AtBeginDocument{%
3100 \fancypagestyle{firstpagestyle}{%
3101 \fancyhf{}%
3102 \renewcommand{\headrulewidth}{\z@}%
3103 \renewcommand{\footrulewidth}{\z@}%
3104 \if@ACM@journal@bibstrip
3105 \ifcase\ACM@format@nr
3106 \relax % manuscript
3107 \fancyhead[L]{\ACM@linecountL}%
3108 \fancyfoot[RO,LE]{\if@ACM@printfolios\small\thepage\fi}%
3109 \if@ACM@nonacm\else%
3110 \fancyfoot[RE,LO]{\footnotesize Manuscript submitted to ACM}%
3111 \fi%
3112 \or % acmsmall
3113 \if@ACM@nonacm\else%
3114 \fancyfoot[RO,LE]{\footnotesize \@journalNameShort, Vol. \@acmVolume, No.
3115 \@acmNumber, Article \@acmArticle. Publication date:
3116 \@acmPubDate.}%
3117 \fi%
3118 \fancyhead[LE]{\ACM@linecountL\@folioblob}%
3119 \fancyhead[LO]{\ACM@linecountL}%
3120 \fancyhead[RO]{\@folioblob}%
3121 \fancyheadoffset[RO,LE]{0.6\@folio@wd}%
3122 \or % acmlarge
3123 \if@ACM@nonacm\else%

```

```

3124 \fancyfoot[RO,LE]{\footnotesize \@journalNameShort, Vol. \@acmVolume, No.
3125 \acmNumber, Article \@acmArticle. Publication date:
3126 \@acmPubDate.}%
3127 \fi%
3128 \fancyhead[RO]{\@folioblob}%
3129 \fancyhead[LE]{\ACM@linecountL\@folioblob}%
3130 \fancyhead[LO]{\ACM@linecountL}%
3131 \fancyheadoffset[RO,LE]{1.4\@folio@wd}%
3132 \or % acmtog
3133 \if@ACM@nonacm\else%
3134 \fancyfoot[RO,LE]{\footnotesize \@journalNameShort, Vol. \@acmVolume, No.
3135 \acmNumber, Article \@acmArticle. Publication date:
3136 \@acmPubDate.}%
3137 \fi%
3138 \fancyhead[L]{\ACM@linecountL}%
3139 \fancyhead[R]{\ACM@linecountR}%
3140 \else % Conference proceedings
3141 \fancyhead[L]{\ACM@linecountL}%
3142 \fancyhead[R]{\ACM@linecountR}%
3143 \fancyfoot[C]{\if@ACM@printfolios\footnotesize\thepage\fi}%
3144 \fi
3145 \else
3146 \fancyhead[L]{\ACM@linecountL}%
3147 \fancyhead[R]{\ACM@linecountR}%
3148 \fancyfoot[C]{\if@ACM@printfolios\footnotesize\thepage\fi}%
3149 \fi
3150 \if@ACM@timestamp
3151 \ifnum\ACM@format@nr=0\relax % Manuscript
3152 \fancyfoot[LO,RE]{\ACM@timestamp\quad
3153 \if@ACM@nonacm\else
3154 \footnotesize Manuscript submitted to ACM
3155 \fi}
3156 \else
3157 \fancyfoot[LO,RE]{\ACM@timestamp}
3158 \fi
3159 \fi
3160 \if@ACM@acmcp
3161 \renewcommand{\footrulewidth}{0.1\p@}%
3162 \fancyheadoffset[L]{46pt}%
3163 \fancyhead[L]{\makebox[\z@][l]{%
3164 \raisebox{-\dimexpr(0.25\textheight*\ACM@ArticleType@nr)}{%
3165 \rotatebox{90}{\colorbox{@ACM@Article@color}{\color{white}%
3166 \strut\ACM@ArticleType~Article}}}%
3167 \ACM@linecountL}%
3168 \fancyhead[R]{\makebox[\z@][r]{\box\@ACM@acmcpbox}}%
3169 \fancyfoot[L,C]{}%
3170 \fancyfoot[R]{\footnotesize
3171 \@journalName, Volume~\@acmVolume, Issue~\@acmNumber,
3172 \ifx\@acmArticle\@empty\else Article~\@acmArticle\fi\space
3173 (\@acmPubDate)\ifx\@acmDOI\@empty\else\\@formatdoi{\@acmDOI}\fi}
3174 \fi
3175 }}

```

### 3.23 Sectioning

\ACM@NRadjust Ross Moore's macro.

Initially \ACM@sect@format@ just passes through its #1 argument unchanged. When a sectioning macro such as \section occurs, the \ACM@NRadjust redefines \ACM@sect@format@ to expand into the styling commands; e.g., \@secfont. Then \Sectionformat is temporarily redefined to produce \realSectionformat{\ACM@sect@format{#1}}{#2}, which ultimately becomes \Sectionformat{\@secfont{#1}}{#2}. This is done to allow \Sectionformat to be variable, as may be needed in particular circumstances. Its current expansion is saved as \realSectionformat which is used with the modified 1st argument, then \Sectionformat is reverted to its former expansion.

To style the section-number, the line #1{} is used at the end of \ACM@NRadjust. This imposes style-changing commands for fonts and sizes, but any \MakeUppercase acts on just the {}. It's a bit hacky, by essentially assuming that only numbers occur here, not letters to be case-changed. (This should be acceptable in a class-file, as it ought to be possible to change the case elsewhere, if that was ever desired.) Also, it can result in \@adddotafter being called too soon, so a slight adjustment is made, via \ACM@adddotafter, which now tests whether its argument is empty. But the coding has to allow for other packages to have also patched \@adddotafter.

```

3176 \def\ACM@NRadjust#1{%
3177   \begingroup
3178   \expandafter\ifx\csname Sectionformat\endcsname\relax
3179   % do nothing when \Sectionformat is unknown
3180   \def\next{\endgroup #1}%
3181   \else
3182   \def\next{\endgroup
3183     \let\realSectionformat\Sectionformat
3184     \def\ACM@sect@format@{#1}%
3185     \let\Sectionformat\ACM@NR@adjustedSectionformat
3186     %% next lines added 2018-06-17 to ensure section number is styled
3187     \let\real@adddotafter\@adddotafter
3188     \let\@adddotafter\ACM@adddotafter
3189     #1{}% imposes the styles, but nullifies \MakeUppercase
3190     \let\@adddotafter\real@adddotafter
3191   }%
3192   \fi \next
3193 }
```

\ACM@NR@adjustedSectionformat

```

3194 \def\ACM@NR@adjustedSectionformat#1#2{%
3195   \realSectionformat{\ACM@sect@format{#1}}{#2}%
3196   \let\Sectionformat\realSectionformat
3197   \DeclareRobustCommand{\ACM@sect@format@}{\ACM@sect@format@}
3198   \def\ACM@sect@format@null#1{#1}
3199   \let\ACM@sect@format@\ACM@sect@format@null
3200   \AtBeginDocument{%
3201     \expandafter\ifx\csname LTX@adddotafter\endcsname\relax
3202     \let\LTX@adddotafter\@adddotafter
3203   \fi
3204 }
```

\ACM@adddotafter

```
3205 \def\ACM@adddotafter#1{\ifx\relax#1\relax\else\LTX@adddotafter{#1}\fi}
```

Sectioning is different for different levels

```
3206 \renewcommand\section{\@startsection{section}{1}{\z@}%
3207   {-1.75\baselineskip \@plus -2\p@ \@minus -.2\p@}%
3208   {.25\baselineskip}%
3209   {\ACM@NRadjust\@secfont}}
3210 \renewcommand\subsection{\@startsection{subsection}{2}{\z@}%
3211   {-1.75\baselineskip \@plus -2\p@ \@minus -.2\p@}%
3212   {.25\baselineskip}%
3213   {\ACM@NRadjust\@subsecfont}}
3214 \renewcommand\subsubsection{\@startsection{subsubsection}{3}{\z@}%
3215   {-1.5\baselineskip \@plus -2\p@ \@minus -.2\p@}%
3216   {-3.5\p@}%
3217   {\ACM@NRadjust{\@subsubsecfont\@adddotafter}}}}
3218 \renewcommand\paragraph{\@startsection{paragraph}{4}{\parindent}%
3219   {-1.5\baselineskip \@plus -2\p@ \@minus -.2\p@}%
3220   {-3.5\p@}%
3221   {\ACM@NRadjust{\@parfont\@adddotafter}}}}
3222 \newcommand\noindentparagraph{\@startsection{paragraph}{4}{\z@}%
3223   {-1.5\baselineskip \@plus -2\p@ \@minus -.2\p@}%
3224   {-3.5\p@}%
3225   {\ACM@NRadjust{\@parfont}}}}
3226
3227 \renewcommand\part{\@startsection{part}{9}{\z@}%
3228   {-10\p@ \@plus -4\p@ \@minus -2\p@}%
3229   {4\p@}%
3230   {\ACM@NRadjust\@parfont}}
```

\section@raggedright Special version of \raggedright compatible with \MakeUppercase

```
3231 \def\section@raggedright{\@rightskip\@flushglue
3232   \rightskip\@rightskip
3233   \leftskip\z@skip
3234   \parindent\z@}
```

\@secfont Fonts for sections etc. are different for different formats.

```
\@subsecfont 3235 \def\@secfont{\sffamily\bfseries\section@raggedright\MakeTextUppercase}
\@subsubsecfont 3236 \def\@subsecfont{\sffamily\bfseries\section@raggedright}
\@parfont 3237 \def\@subsubsecfont{\sffamily\itshape}
3238 \def\@parfont{\itshape}
3239 \setcounter{secnumdepth}{3}
3240 \ifcase\ACM@format@nr
3241 \relax % manuscript
3242 \or % acmsmall
3243 \or % acmlarge
3244 \def\@secfont{\sffamily\large\section@raggedright\MakeTextUppercase}
3245 \def\@subsecfont{\sffamily\large\section@raggedright}
3246 \or % acmtog
3247 \def\@secfont{\sffamily\large\section@raggedright\MakeTextUppercase}
3248 \def\@subsecfont{\sffamily\large\section@raggedright}
3249 \or % sigconf
3250 \def\@secfont{\bfseries\Large\section@raggedright\MakeTextUppercase}
3251 \def\@subsecfont{\bfseries\Large\section@raggedright}
```

```

3252 \or % siggraph
3253 \def\@secfont{\sffamily\bfseries\Large\section@raggedright\MakeTextUppercase}
3254 \def\@subsecfont{\sffamily\bfseries\Large\section@raggedright}
3255 \or % sigplan
3256 \def\@secfont{\bfseries\Large\section@raggedright}
3257 \def\@subsecfont{\bfseries\section@raggedright}
3258 \def\@subsubsecfont{\bfseries\section@raggedright}
3259 \def\@parfont{\bfseries\itshape}
3260 \def\@subparfont{\itshape}
3261 \or % sigchi
3262 \setcounter{secnumdepth}{1}
3263 \def\@secfont{\sffamily\bfseries\section@raggedright\MakeTextUppercase}
3264 \def\@subsecfont{\sffamily\bfseries\section@raggedright}
3265 \or % sigchi-a
3266 \setcounter{secnumdepth}{0}
3267 \def\@secfont{\sffamily\bfseries\section@raggedright\MakeTextUppercase}
3268 \def\@subsecfont{\sffamily\bfseries\section@raggedright}
3269 \or % acmengage
3270 \def\@secfont{\bfseries\Large\section@raggedright\MakeTextUppercase}
3271 \def\@subsecfont{\bfseries\Large\section@raggedright}
3272 \or %acmcp
3273 \fi

```

\@adddotafter Add punctuation after a sectioning command

```

3274 \def\@adddotafter#1{#1\@addpunct{.}}

```

\@addspaceafter Add space after a sectioning command

```

3275 \def\@addspaceafter#1{#1\@addpunct{\enspace}}

```

```

3276 \if@ACM@acmcp
3277   \setcounter{secnumdepth}{-1}%
3278 \fi

```

### 3.24 TOC lists

\@dotsep Related to the \tableofcontents are all the horizontal fillers. Base L<sup>A</sup>T<sub>E</sub>X defines \@dottedtocline, which we should not disable. Yet, this command expects \@dotsep to be defined but leaves this to the class implementation. Since amsart does not provide this, we copy the standard variant from article here.

```

3279 \providecommand*\@dotsep{4.5}

```

### 3.25 Theorems

\@acmplainbodyfont The font to typeset the body of the acmplain theorem style.

```

3280 \def\@acmplainbodyfont{\itshape}

```

\@acmplainindent The amount to indent the acmplain theorem style.

```

3281 \def\@acmplainindent{\parindent}

```

\@acmplainheadfont The font to typeset the head of the acmplain theorem style.

```

3282 \def\@acmplainheadfont{\scshape}

```

`\acmplainnotefont` The font to typeset the note of the acmplain theorem style.

```
3283 \def\acmplainnotefont{\@empty}
```

Customization of the acmplain theorem style:

```
3284 \ifcase\ACM@format@nr
3285 \relax % manuscript
3286 \or % acmsmall
3287 \or % acmlarge
3288 \or % acmtog
3289 \or % sigconf
3290 \or % siggraph
3291 \or % sigplan
3292 \def\acmplainbodyfont{\itshape}
3293 \def\acmplainindent{\z@}
3294 \def\acmplainheadfont{\bfseries}
3295 \def\acmplainnotefont{\normalfont}
3296 \or % sigchi
3297 \or % sigchi-a
3298 \or % acmengage
3299 \or % acmcp
3300 \fi
```

`acmplain` The acmplain theorem style

```
3301 \newtheoremstyle{acmplain}%
3302 { .5\baselineskip \@plus.2\baselineskip
3303   \@minus.2\baselineskip}% space above
3304 { .5\baselineskip \@plus.2\baselineskip
3305   \@minus.2\baselineskip}% space below
3306 {\@acmplainbodyfont}% body font
3307 {\@acmplainindent}% indent amount
3308 {\@acmplainheadfont}% head font
3309 { .}% punctuation after head
3310 { .5em}% spacing after head
3311 {\thmname{#1}\thmnumber{ #2}\thmnote{ {\@acmplainnotefont{#3}}}}% head spec
```

`\acmdefinitionbodyfont` The font to typeset the body of the acmdefinition theorem style.

```
3312 \def\acmdefinitionbodyfont{\normalfont}
```

`\acmdefinitionindent` The amount to indent the acmdefinition theorem style.

```
3313 \def\acmdefinitionindent{\parindent}
```

`\acmdefinitionheadfont` The font to typeset the head of the acmdefinition theorem style.

```
3314 \def\acmdefinitionheadfont{\itshape}
```

`\acmdefinitionnotefont` The font to typeset the note of the acmdefinition theorem style.

```
3315 \def\acmdefinitionnotefont{\@empty}
```

Customization of the acmdefinition theorem style:

```
3316 \ifcase\ACM@format@nr
3317 \relax % manuscript
3318 \or % acmsmall
3319 \or % acmlarge
3320 \or % acmtog
```

```

3321 \or % sigconf
3322 \or % siggraph
3323 \or % sigplan
3324 \def\@acmdefinitionbodyfont{\normalfont}
3325 \def\@acmdefinitionindent{\z@}
3326 \def\@acmdefinitionheadfont{\bfseries}
3327 \def\@acmdefinitionnotefont{\normalfont}
3328 \or % sigchi
3329 \or % sigchi-a
3330 \or % acmengage
3331 \or % acmcp
3332 \fi

```

acmdefinition The acmdefinition theorem style

```

3333 \newtheoremstyle{acmdefinition}%
3334   {.5\baselineskip\@plus.2\baselineskip
3335    \@minus.2\baselineskip}% space above
3336   {.5\baselineskip\@plus.2\baselineskip
3337    \@minus.2\baselineskip}% space below
3338   {\@acmdefinitionbodyfont}% body font
3339   {\@acmdefinitionindent}% indent amount
3340   {\@acmdefinitionheadfont}% head font
3341   {.}% punctuation after head
3342   {.5em}% spacing after head
3343   {\thmname{#1}\thmnumber{#2}\thmnote{ {\@acmdefinitionnotefont{#3}}}}% head spec

```

Make acmplain the default theorem style.

```

3344 \theoremstyle{acmplain}

```

Delay defining the theorem environments until after other packages have been loaded. In particular, the `cleveref` package must be loaded before the theorem environments are defined in order to show the correct environment name (see <https://github.com/borisveytsman/acmart/issues/138>). The `acmthm` option is used to suppress the definition of any theorem environments. Also, to avoid obscure errors arising from these environment definitions conflicting with environments defined by the user or by user-loaded packages, we only define environments that have not yet been defined.

```

3345 \AtEndPreamble{%
3346   \if@ACM@acmthm
3347   \theoremstyle{acmplain}
3348   \@ifundefined{theorem}{%
3349     \newtheorem{theorem}{Theorem}[section]
3350   }{}
3351   \@ifundefined{conjecture}{%
3352     \newtheorem{conjecture}[theorem]{Conjecture}
3353   }{}
3354   \@ifundefined{proposition}{%
3355     \newtheorem{proposition}[theorem]{Proposition}
3356   }{}
3357   \@ifundefined{lemma}{%
3358     \newtheorem{lemma}[theorem]{Lemma}
3359   }{}
3360   \@ifundefined{corollary}{%
3361     \newtheorem{corollary}[theorem]{Corollary}

```

```

3362 }{}
3363 \theoremstyle{acmdefinition}
3364 \@ifundefined{example}{%
3365 \newtheorem{example}[theorem]{Example}
3366 }{}
3367 \@ifundefined{definition}{%
3368 \newtheorem{definition}[theorem]{Definition}
3369 }{}
3370 \fi
3371 \theoremstyle{acmplain}
3372 }

```

`\@proofnamefont` The font to typeset the proof name.

```

3373 \def\@proofnamefont{\scshape}

```

`\@proofindent` Whether or not to indent proofs.

```

3374 \def\@proofindent{\indent}

```

Customization of the proof environment.

```

3375 \ifcase\ACM@format@nr
3376 \relax % manuscript
3377 \or % acmsmall
3378 \or % acmlarge
3379 \or % acmtog
3380 \or % sigconf
3381 \or % siggraph
3382 \or % sigplan
3383 \def\@proofnamefont{\itshape}
3384 \def\@proofindent{\noindent}
3385 \or % sigchi
3386 \or % sigchi-a
3387 \or % acmengage
3388 \or % acmcp
3389 \fi

```

`proof` We want some customization of the proof environment.

```

3390 \renewenvironment{proof}[1][\proofname]{\par
3391 \pushQED{\qed}%
3392 \normalfont \topsep6\p@\@plus6\p@\relax
3393 \trivlist
3394 \item[\@proofindent\hskip\labelsep
3395 {\@proofnamefont #1\@addpunct{.}}]\ignorespaces
3396 }{%
3397 \popQED\endtrivlist\endpfalse
3398 }

```

### 3.26 Balancing columns

We need balancing only if the user did not disable it, and we use a two column format. Note that `pbalance` uses a different mechanism.

```

3399 \AtEndPreamble{%
3400 \if@ACM@pbalance
3401 \global\@ACM@balancefalse

```

```

3402 \ifcase\ACM@format@nr
3403 \relax % manuscript
3404 \or % acmsmall
3405 \or % acmlarge
3406 \or % acmtog
3407 \RequirePackage{pbalance}%
3408 \or % sigconf
3409 \RequirePackage{pbalance}%
3410 \or % siggraph
3411 \RequirePackage{pbalance}%
3412 \or % sigplan
3413 \RequirePackage{pbalance}%
3414 \or % sigchi
3415 \RequirePackage{pbalance}%
3416 \or % sigchi-a
3417 \or % acmengage
3418 \RequirePackage{pbalance}%
3419 \or % acmcp
3420 \fi
3421 \fi
3422 \if@ACM@balance
3423 \ifcase\ACM@format@nr
3424 \relax % manuscript
3425 \global\@ACM@balancefalse
3426 \or % acmsmall
3427 \global\@ACM@balancefalse
3428 \or % acmlarge
3429 \global\@ACM@balancefalse
3430 \or % acmtog
3431 \RequirePackage{balance}%
3432 \or % sigconf
3433 \RequirePackage{balance}%
3434 \or % siggraph
3435 \RequirePackage{balance}%
3436 \or % sigplan
3437 \RequirePackage{balance}%
3438 \or % sigchi
3439 \RequirePackage{balance}%
3440 \or % sigchi-a
3441 \global\@ACM@balancefalse
3442 \or % acmengage
3443 \RequirePackage{balance}%
3444 \or % acmcp
3445 \global\@ACM@balancefalse
3446 \fi
3447 \fi
3448 }
3449 \AtEndDocument{%
3450 \if@ACM@balance
3451 \if@twocolumn
3452 \balance
3453 \fi\fi}

```

### 3.27 Acknowledgments

```
\acksname
3454 \newcommand\acksname{Acknowledgments}

\acks This is a comment-like structure
3455 \specialcomment{acks}{%
3456   \begingroup
3457   \section*{\acksname}
3458   \phantomsection\addcontentsline{toc}{section}{\acksname}
3459 }{%
3460   \endgroup
3461 }

\grantsponsor We just typeset the name of the sponsor
3462 \def\grantsponsor#1#2#3{#2}

\grantnum
3463 \newcommand\grantnum[3][]{#3%
3464   \def\@tempa{#1}\ifx\@tempa\@empty\else\space(\url{#1})\fi}
```

### 3.28 Conditional typesetting

We use the comment package for conditional typesetting:

```
3465 \AtEndPreamble{%
3466   \if@ACM@screen
3467     \includecomment{screenonly}
3468     \excludecomment{printonly}
3469   \else
3470     \excludecomment{screenonly}
3471     \includecomment{printonly}
3472   \fi
3473   \if@ACM@anonymous
3474     \excludecomment{anonsuppress}
3475     \excludecomment{acks}
3476   \else
3477     \includecomment{anonsuppress}
3478   \fi}
```

### 3.29 Additional bibliography commands

\showeprint The command \showeprint has two arguments: the (optional) prefix and the eprint number. Right now the only prefix we understand is the (lowercase) word ‘arxiv’.

```
3479 \newcommand\showeprint[2][arxiv]{%
3480   \def\@tempa{#1}%
3481   \ifx\@tempa\@empty\def\@tempa{arxiv}\fi
3482   \def\@tempb{arxiv}%
3483   \ifx\@tempa\@tempb\relax
3484     arXiv:\href{https://arxiv.org/abs/#2}{#2}%
3485   \else
3486     \def\@tempb{arXiv}%
3487     \ifx\@tempa\@tempb\relax
3488       arXiv:\href{https://arxiv.org/abs/#2}{#2}%
```

```

3489     \else
3490         #1:#2%
3491     \fi
3492 \fi}

```

### 3.30 Index

`\theindex` Standard amsart uses plain page style in index pages. This clashes with line numbering for review option, so we redefine it.

```

3493 \def\theindex{\@restonecoltrue\if@twocolumn\@restonecolfalse\fi
3494   \columnseprule\z@ \columnsep 35\p@
3495   \@indextitlestyle
3496   \let\item\@idxitem
3497   \parindent\z@ \parskip\z@\@plus.3\p@\relax
3498   \raggedright
3499   \hyphenpenalty\@M
3500   \footnotesize}

```

### 3.31 End of Class

`\vspace` We do not disable `\vspace`, but add warning to it

```

3501 \let\@vspace@orig=\@vspace
3502 \let\@vspacer@orig=\@vspacer
3503 \apptocmd{\@vspace}{\ClassWarning{\@classname}{\string\vspace\space should
3504   only be used to provide space above/below surrounding
3505   objects}}{}{}
3506 \apptocmd{\@vspacer}{\ClassWarning{\@classname}{\string\vspace\space should
3507   only be used to provide space above/below surrounding
3508   objects}}{}{}
3509 \let\@vspace@acm=\@vspace
3510 \let\@vspacer@acm=\@vspacer

```

`\ACM@origbaselinestretch` We produce an error if the user tries to change `\baselinestretch`

```

3511 \let\ACM@origbaselinestretch\baselinestretch
3512 \AtEndDocument{\ifx\baselinestretch\ACM@origbaselinestretch\else
3513   \ClassError{\@classname}{An attempt to redefine
3514     \string\baselinestretch\space detected. Please do not do this for
3515     ACM submissions!}\fi}

```

```

3516 \normalsize\normalfont\frenchspacing
3517 </class>

```

## References

- [1] UK TeX Users Group. UK list of TeX frequently asked questions. <https://texfaq.org>, 2019.
- [2] Michael Downes and Barbara Beeton. *The amsart, amsproc, and amsbook document classes*. American Mathematical Society, August 2004. <http://www.ctan.org/pkg/amslatex>.
- [3] Johannes L. Braams and Javier Bezos. *Babel*, 2022. <http://www.ctan.org/pkg/babel>.
- [4] Cristophe Fiorio. *algorithm2e.sty—package for algorithms*, October 2015. <http://www.ctan.org/pkg/algorithm2e>.
- [5] Rogério Brito. *The algorithms bundle*, August 2009. <http://www.ctan.org/pkg/algorithms>.
- [6] Carsten Heinz, Brooks Moses, and Jobst Hoffmann. *The Listings Package*, June 2015. <http://www.ctan.org/pkg/listings>.
- [7] Simon Fear. *Publication quality tables in L<sup>A</sup>T<sub>E</sub>X*, April 2005. <http://www.ctan.org/pkg/booktabs>.
- [8] Association for Computing Machinery. *ACM Visual Identity Standards*, 2007. <http://identitystandards.acm.org>.
- [9] Axel Sommerfeldt. *The subcaption package*, April 2013. <http://www.ctan.org/pkg/subcaption>.
- [10] Boris Veytsman, Bern Schandl, Lee Netherton, and C. V. Radhakrishnan. *A package to create a nomenclature*, September 2005. <http://www.ctan.org/pkg/nomencl>.
- [11] Nicola L. C. Talbot. *User Manual for glossaries.sty v4.44*, December 2019. <http://www.ctan.org/pkg/glossaries>.
- [12] David Carlisle. *The textcase package*, October 2004. <http://www.ctan.org/pkg/textcase>.

## Change History

|       |                                                                                                                                                          |    |                                                                |                                                                                                       |
|-------|----------------------------------------------------------------------------------------------------------------------------------------------------------|----|----------------------------------------------------------------|-------------------------------------------------------------------------------------------------------|
| 1.48  | General: Added prologue option to xcolor . . . . .                                                                                                       | 50 | \ccsdesc@parse: Added warning for missing concepts . . . . .   | 75                                                                                                    |
|       | Bib code cleanup (Zack Weinberg)                                                                                                                         | 35 | \if@ACM@printacmref: Added warning for longer papers . . . . . | 73                                                                                                    |
|       | Documentation update (siggraph) .                                                                                                                        | 35 | \keywords: Added warning for missing keywords . . . . .        | 72                                                                                                    |
| 1.49  | General: New journal: DTRAP . . . . .                                                                                                                    | 35 | 1.69                                                           | \vspace: Added the changed command to avoid grouping . . .                                            |
| 1.53  | General: New journals: PACMCGIT, TIOT, TDSCI . . . . .                                                                                                   | 35 | 1.70                                                           | General: Name change for TDS . . . . .                                                                |
|       | Rearranged docs . . . . .                                                                                                                                | 35 | 1.71                                                           | General: Bibliography change: volume for @inproceedings is now in brackets together with series . . . |
| 1.54  | General: Moved footnote stuff before hyperref call (Ross Moore) . . . . .                                                                                | 35 |                                                                | LuaTeX now uses the OTF versions of fonts . . . . .                                                   |
| 1.56  | General: Documented \Description                                                                                                                         | 35 |                                                                | Retired sigchi and sigchi-a . . . . .                                                                 |
| 1.57  | General: Booktabs package is now the default . . . . .                                                                                                   | 35 | 1.75                                                           | General: Documentation update . . .                                                                   |
| 1.58  | General: Changes in samples (Enrico Gregorio) . . . . .                                                                                                  | 35 | 1.78                                                           | General: Documentation update: Word count . . . . .                                                   |
|       | New journal: HEALTH. TDS is renamed to TDSCI . . . . .                                                                                                   | 35 | 1.79                                                           | General: Updated indormation for TAP, TCPS, TEAC . . . . .                                            |
| 1.60  | General: New option: urlbreakonhyphens . . . . .                                                                                                         | 35 | 1.80                                                           | General: Added DLT and FAC . . . . .                                                                  |
|       | \if@ACM@urlbreakonhyphens: introduced macro . . . . .                                                                                                    | 36 | 1.82                                                           | General: Updated abbreviations and codes for several journals . . . . .                               |
| 1.62  | General: New journal: TELO . . . . .                                                                                                                     | 35 | 1.84                                                           | General: New journals: JDS, GAMES . . . . .                                                           |
| 1.63  | General: New journal: FACMP . . . . .                                                                                                                    | 35 | 1.85                                                           | General: Added CC licenses . . . . .                                                                  |
|       | New journal: TQUANT . . . . .                                                                                                                            | 35 |                                                                | Added: acmengage . . . . .                                                                            |
| 1.63a | General: Move: TQUANT to TQC . . .                                                                                                                       | 35 |                                                                | New journal: JRC . . . . .                                                                            |
| 1.64  | General: Putting abstract after \maketitle now causes an error .                                                                                         | 35 |                                                                | \@mkauthors: Added: acmengage . .                                                                     |
| 1.65  | General: New journal: DGOV . . . . .                                                                                                                     | 35 |                                                                | \@mktitle: Added: acmengage . . . .                                                                   |
| 1.66  | General: ACM reference format is now mandatory for papers over one page; CCS concepts and keywords are now mandatory for papers over two pages . . . . . | 35 |                                                                | \@parfont: Added: acmengage . . . .                                                                   |
|       | Authors' addresses are mandatory for journal articles . . . . .                                                                                          | 35 |                                                                | \@printtopmatter: Added: acmengage . . . . .                                                          |
|       | \@mkauthorsaddresses: Added warning for missing addresses . .                                                                                            | 97 |                                                                | \@specialsection: Added: acmengage . . . . .                                                          |
|       |                                                                                                                                                          |    |                                                                | \@subtitlefont: Added: acmengage . .                                                                  |
|       |                                                                                                                                                          |    |                                                                | \@titlefont: Added: acmengage . .                                                                     |
|       |                                                                                                                                                          |    |                                                                | \ACM@linecountR: Added: acmengage . . . . .                                                           |
|       |                                                                                                                                                          |    |                                                                | format: New format: acmengage . . .                                                                   |
|       |                                                                                                                                                          |    |                                                                | \parskip: Added: acmengage . . . .                                                                    |

|       |                                                                                                                                                                                                  |    |                                                                                                                                                                                                                    |     |
|-------|--------------------------------------------------------------------------------------------------------------------------------------------------------------------------------------------------|----|--------------------------------------------------------------------------------------------------------------------------------------------------------------------------------------------------------------------|-----|
| 1.87  | General: New journals: ACMJCSS,<br>JATS, TORS . . . . .                                                                                                                                          | 59 | \acmISBN: Name change by Matthew<br>Fluet . . . . .                                                                                                                                                                | 71  |
|       | format: New format: acmcp . . . . .                                                                                                                                                              | 36 | v1.05                                                                                                                                                                                                              |     |
| 1.88  | General: Added ISSN for ACMJCSS . . . . .                                                                                                                                                        | 59 | General: Added processing doi<br>numbers for acmsiggraph and doi<br>numbers for sigproc.bib . . . . .                                                                                                              | 35  |
|       | Added ISSN for GAMES . . . . .                                                                                                                                                                   | 59 | Patched \setcitestyle command;<br>closes <a href="https://github.com/borisveytsman/acmart/issues/19">https:<br/>//github.com/borisveytsman/<br/>acmart/issues/19</a> . . . . .                                     | 35  |
|       | Added PACMNET . . . . .                                                                                                                                                                          | 59 |                                                                                                                                                                                                                    |     |
| v1.00 | General: First released version . . . . .                                                                                                                                                        | 35 | v1.06                                                                                                                                                                                                              |     |
| v1.01 | General: Changed hyperref colors in<br>screen mode (closes <a href="https://github.com/borisveytsman/acmart/issues/1">https:<br/>//github.com/borisveytsman/<br/>acmart/issues/1</a> ) . . . . . | 35 | \@ACM@badge@skip: Added macro . . . . .                                                                                                                                                                            | 72  |
|       | Defined ACM colors . . . . .                                                                                                                                                                     | 35 | \@ACM@badge@width: Added macro . . . . .                                                                                                                                                                           | 71  |
|       | Explicitly put draft option (closes<br><a href="https://github.com/borisveytsman/acmart/issues/4">https:<br/>//github.com/borisveytsman/<br/>acmart/issues/4</a> ) . . . . .                     | 38 | \@ACM@title@width: Added macro . . . . .                                                                                                                                                                           | 72  |
|       | Set headheight to 1pc for all<br>formats (closes <a href="https://github.com/borisveytsman/acmart/issues/5">https:<br/>//github.com/borisveytsman/<br/>acmart/issues/5</a> ) . . . . .           | 35 | \@mktitle@i: Added processing<br>badges . . . . .                                                                                                                                                                  | 89  |
| v1.02 | General: Added TOPS and TSC (closes<br><a href="https://github.com/borisveytsman/acmart/issues/12">https:<br/>//github.com/borisveytsman/<br/>acmart/issues/12</a> ) . . . . .                   | 35 | Made generic . . . . .                                                                                                                                                                                             | 89  |
|       | Documentation changes (closes<br><a href="https://github.com/borisveytsman/acmart/issues/13">https:<br/>//github.com/borisveytsman/<br/>acmart/issues/13</a> ) . . . . .                         | 35 | \@mktitle@ii: Now this macro is<br>obsolete . . . . .                                                                                                                                                              | 89  |
| v1.03 | General: Added anonsuppress<br>environment . . . . .                                                                                                                                             | 35 | \@mktitle@iii: Added processing<br>badges . . . . .                                                                                                                                                                | 89  |
|       | Added authorversion option (closes<br><a href="https://github.com/borisveytsman/acmart/issues/9">https:<br/>//github.com/borisveytsman/<br/>acmart/issues/9</a> ) . . . . .                      | 35 | Made more generic . . . . .                                                                                                                                                                                        | 89  |
|       | \@formatdoi: Added macro . . . . .                                                                                                                                                               | 78 | \@mktitle@iv: Made more generic . . . . .                                                                                                                                                                          | 90  |
|       | \if@ACM@authorversion: Added<br>macro . . . . .                                                                                                                                                  | 37 | \@printtopmatter: Added processing<br>badges . . . . .                                                                                                                                                             | 86  |
|       | \maketitle: Added special case of<br>authorversion . . . . .                                                                                                                                     | 82 | \@subtitlefont: Added macro . . . . .                                                                                                                                                                              | 88  |
| v1.04 | General: Updated bibliography for<br>siggraph . . . . .                                                                                                                                          | 35 | \@titlefont: Added macro . . . . .                                                                                                                                                                                 | 88  |
|       | \acmArticleSeq: Name change by<br>Matthew Fluet . . . . .                                                                                                                                        | 71 | \acmBadgeL: Added macro . . . . .                                                                                                                                                                                  | 72  |
|       | \acmDOI: Name change by Matthew<br>Fluet . . . . .                                                                                                                                               | 71 | \acmBadgeR: Added macro . . . . .                                                                                                                                                                                  | 72  |
|       |                                                                                                                                                                                                  |    | \if@ACM@badge: Added macro . . . . .                                                                                                                                                                               | 71  |
|       |                                                                                                                                                                                                  |    | v1.07                                                                                                                                                                                                              |     |
|       |                                                                                                                                                                                                  |    | \maketitle: Corrected a bug with<br>abstract footnotes . . . . .                                                                                                                                                   | 82  |
|       |                                                                                                                                                                                                  |    | Corrected a bug with permission<br>and footnotes order . . . . .                                                                                                                                                   | 82  |
|       |                                                                                                                                                                                                  |    | v1.08                                                                                                                                                                                                              |     |
|       |                                                                                                                                                                                                  |    | General: SIGPLAN reformatting by<br>Matthew Fluet . . . . .                                                                                                                                                        | 35  |
|       |                                                                                                                                                                                                  |    | Typos corrected (Tobias Pape) . . . . .                                                                                                                                                                            | 35  |
|       |                                                                                                                                                                                                  |    | v1.09                                                                                                                                                                                                              |     |
|       |                                                                                                                                                                                                  |    | General: Revert SIGPLAN caption<br>rules . . . . .                                                                                                                                                                 | 35  |
|       |                                                                                                                                                                                                  |    | v1.10                                                                                                                                                                                                              |     |
|       |                                                                                                                                                                                                  |    | General: Changes of<br>'licensedothergov' wording . . . . .                                                                                                                                                        | 76  |
|       |                                                                                                                                                                                                  |    | \maketitle: Corrected a bug with doi<br>in manuscript and author version,<br><a href="https://github.com/borisveytsman/acmart/issues/36">https:<br/>//github.com/borisveytsman/<br/>acmart/issues/36</a> . . . . . | 82  |
|       |                                                                                                                                                                                                  |    | standardpagestyle: Reversed folios<br>location . . . . .                                                                                                                                                           | 101 |

|       |                                                                                           |     |       |                                                                        |     |
|-------|-------------------------------------------------------------------------------------------|-----|-------|------------------------------------------------------------------------|-----|
| v1.11 | General: Customization of ACM theorem styles and proof environment by Matthew Fluet . . . | 35  | v1.15 | \@ACM@addtoaddress: Added macro                                        | 90  |
|       |                                                                                           |     |       | \@mkauthors@iii: New authors system . . . . .                          | 94  |
| v1.12 | General: Added graceful behavior when libertine fonts are absent . . .                    | 53  |       | \@shortauthors: Introduced macro . .                                   | 101 |
|       | Documentation updates . . . . .                                                           | 35  |       | \@typeset@author@bx: Moved to separate macro . . . . .                 | 94  |
|       | \@marginfigure: Now centering by default . . . . .                                        | 57  |       | \acks: Added macro . . . . .                                           | 113 |
|       | \@marginfigure: Now centering by default . . . . .                                        | 57  |       | \affiliation: Added code for author groups . . . . .                   | 68  |
|       | \@parfont: Moved to \section@raggedright . . . . .                                        | 107 |       | \author: Added code for author groups . . . . .                        | 67  |
|       | \copyrightpermissionfootnoterule: Added macro . . . . .                                   | 52  |       | \city: Added macro . . . . .                                           | 91  |
|       | \descriptionlabel: Redefined . . . .                                                      | 59  |       | \country: Added macro . . . . .                                        | 91  |
|       | \footnoterule: Made shorter . . . . .                                                     | 53  |       | \department: Added macro . . . . .                                     | 91  |
|       | \if@ACM@natbib@override: Added macro . . . . .                                            | 37  |       | \grantnum: Added macro . . . . .                                       | 113 |
|       | \if@ACM@newfonts: Added macro . . .                                                       | 54  |       | \grantsponsor: Added macro . . . . .                                   | 113 |
|       | \maketitle: Moved thankses to copyrightpermission box . . . . .                           | 82  |       | \if@insideauthorgroup: Introduced macro . . . . .                      | 67  |
|       | \section@raggedright: Introduced macro . . . . .                                          | 107 |       | \institution: Added macro . . . . .                                    | 91  |
| v1.13 | General: Font adjustments for acmsmall . . . . .                                          | 92  |       | \num@authorgroups: Renamed . . . .                                     | 67  |
|       | Increased font size for ACM Large . .                                                     | 40  |       | \orcid: Introduced macro . . . . .                                     | 69  |
|       | Print bibliographic information by default for the proceedings . . . . .                  | 73  |       | \position: Added macro . . . . .                                       | 91  |
|       | \@mpfootnotetext: Made minipage footnotes centered . . . . .                              | 48  |       | \postcode: Added macro . . . . .                                       | 91  |
|       | \bibliographystyle: Redefined macro . . . . .                                             | 49  |       | \state: Added macro . . . . .                                          | 91  |
|       | \bibstyle@acmauthoryear: Added macro . . . . .                                            | 43  |       | \streetaddress: Added macro . . . .                                    | 91  |
|       | \bibstyle@acmnumeric: Added macro . . . . .                                               | 43  |       | standardpagestyle: Better handling of anonymous mode . . . . .         | 101 |
|       | \if@ACM@printfolios: Added macro                                                          | 73  | v1.16 | General: Formatting header/footer (Matthew Fluet) . . . . .            | 35  |
|       | standardpagestyle: Added headers for sigs . . . . .                                       | 101 |       | \@headfootfont: Added macro . . . .                                    | 101 |
|       | Expanded headers for sigchi-a . . .                                                       | 101 |       | standardpagestyle: Customize header/footer text font . . . . .         | 101 |
|       | Suppressed folios if sig . . . . .                                                        | 101 | v1.17 | General: Slightly decreased margins for sigs . . . . .                 | 50  |
| v1.14 | General: \citestyle updates (Matthew Fluet) . . . . .                                     | 35  |       | \@makefnmark: Redefined . . . . .                                      | 48  |
|       | Patched \citestyle . . . . .                                                              | 41  |       | \@mkauthors: TOG now uses the same authors block as other journals . . | 91  |
|       | \bibstyle@acmauthoryear: Moved def of \bibstyle@acmauthoryear before use . . . . .        | 43  |       | \@mkauthors@ii: Deleted . . . . .                                      | 94  |
|       | \bibstyle@acmnumeric: Moved def of \bibstyle@numeric before use . .                       | 43  |       | \@mkbibcitation: Added \nobreak Changed format for sigs . . . . .      | 98  |
|       |                                                                                           |     |       | \acmArticle: The default is now numerical . . . . .                    | 71  |
|       |                                                                                           |     |       | \acmMonth: The default must be numerical. Closes #50. . . . .          | 71  |
|       |                                                                                           |     |       | \acmNumber: The default is now numerical . . . . .                     | 71  |
|       |                                                                                           |     |       | \acmVolume: The default is now numerical . . . . .                     | 71  |
|       |                                                                                           |     |       | \acmYear: The default is now numerical . . . . .                       | 71  |
|       |                                                                                           |     |       | \description: Decreased indent . . .                                   | 59  |

|                                                                                                              |     |                                                                                                                                       |     |
|--------------------------------------------------------------------------------------------------------------|-----|---------------------------------------------------------------------------------------------------------------------------------------|-----|
| \grantnum: Added url . . . . .                                                                               | 113 | \mkabstract: Removed spurious indentation (John Wickerson) . . .                                                                      | 97  |
| \grantsponsor: Renamed . . . . .                                                                             | 113 | \ccsdesc@parse: Add spacing after bullet and around rightharrow; semicolon separators no longer in bold/italic (John Wickerson) . . . | 75  |
| \if@ACM@printacmref: Renamed from \if@ACM@printbib . . . . .                                                 | 73  | standardpagestyle: Corrected printfolios (Matthew Fluet) . . .                                                                        | 101 |
| standardpagestyle: Added paper title to sigs . . . . .                                                       | 101 |                                                                                                                                       |     |
| v1.18                                                                                                        |     | v1.30                                                                                                                                 |     |
| General: Natbib is now the default for all formats . . . . .                                                 | 35  | General: Added \frenchspacing . . .                                                                                                   | 114 |
| \mkauthors@i: Now we andify affiliations . . . . .                                                           | 93  | Bibtex style now recognizes https:// in doi . . . . .                                                                                 | 35  |
| \typeset@author@line: Added macro . . . . .                                                                  | 92  | Switched to T1: looks like libertine has problems with \l in OT1 . . .                                                                | 54  |
| v1.19                                                                                                        |     | Updated IMWUT and PACMPL . . .                                                                                                        | 59  |
| General: Include 'Abstract', 'Acknowledgements', and 'References' in PDF bookmarks (Matthew Fluet) . . . . . | 35  | \department: Added optional parameter . . . . .                                                                                       | 91  |
| Include 'References' in PDF bookmarks (Matthew Fluet) . . . .                                                | 41  | v1.31                                                                                                                                 |     |
| \mkabstract: Include 'Abstract' in PDF bookmarks (Matthew Fluet) . .                                         | 97  | General: Documentation changes . . .                                                                                                  | 35  |
| \acks: Include 'Acknowledgements' in PDF bookmarks (Matthew Fluet) .                                         | 113 | \@additionalaffiliation: Added macro . . . . .                                                                                        | 69  |
| v1.20                                                                                                        |     | \mkbibcitation: Disabled linebreak .                                                                                                  | 98  |
| General: Bug fixes for bst . . . . .                                                                         | 35  | \@startsection: Added \tochangmeasure . . . . .                                                                                       | 45  |
| \mkabstract: Deleted spurious space .                                                                        | 97  | Redefined macro . . . . .                                                                                                             | 47  |
| v1.21                                                                                                        |     | \@textbottom: Redefined . . . . .                                                                                                     | 53  |
| \showeprint: Added macro . . . . .                                                                           | 113 | \acmMonth: The default now is the current month (Matteo Riondato) .                                                                   | 71  |
| v1.22                                                                                                        |     | \acmYear: The default now is the current year (Matteo Riondato) . .                                                                   | 71  |
| General: More bibliography changes for Aptara . . . . .                                                      | 35  | \additionalaffiliation: Added macro . . . . .                                                                                         | 69  |
| v1.23                                                                                                        |     | \l@section: Redefined macro . . .                                                                                                     | 47  |
| General: Add PACMPL journal option .                                                                         | 35  | \l@subsubsection: Redefined macro .                                                                                                   | 47  |
| v1.24                                                                                                        |     | v1.32                                                                                                                                 |     |
| General: Add IMWUT journal option .                                                                          | 59  | General: Added POMACS journal option . . . . .                                                                                        | 35  |
| v1.25                                                                                                        |     | Format siggraph is now obsolete . .                                                                                                   | 35  |
| General: Updated PACMPL . . . . .                                                                            | 59  | \@formatdoi: New doi format . . . .                                                                                                   | 78  |
| v1.26                                                                                                        |     | v1.33                                                                                                                                 |     |
| General: Corrected \shortcite bug . .                                                                        | 35  | General: Added acmart-preload-hook .                                                                                                  | 35  |
| Documentation typos fixed (thanks to Stephen Spencer) . . . . .                                              | 35  | Added cmap and glyphtounicode . .                                                                                                     | 53  |
| v1.27                                                                                                        |     | BibTeX comma before articleno bug corrected . . . . .                                                                                 | 35  |
| \if@ACM@printccs: Typo corrected . .                                                                         | 73  | BibTeX crossref bug corrected . . .                                                                                                   | 35  |
| v1.28                                                                                                        |     | BibTeX numpages bug corrected . . .                                                                                                   | 35  |
| General: Corrected option natbib behavior . . . . .                                                          | 43  | Documentation updates . . . . .                                                                                                       | 35  |
| Got rid of warnings in pdf keywords .                                                                        | 48  | Moved \citename definition for non-natbib bibliography, so a package may redefine it . . . . .                                        | 49  |
| \ccsdesc@parse: Change from \to to \textrightharrow (Matteo Riondato) . . . . .                              | 75  | Switched to Type 1 fonts for libertine even if OTF-capable engine is used (Kai Mundermann) .                                          | 54  |
| v1.29                                                                                                        |     |                                                                                                                                       |     |
| General: Increased head to 13pt . . . .                                                                      | 50  |                                                                                                                                       |     |

|                                      |     |                                         |        |
|--------------------------------------|-----|-----------------------------------------|--------|
| \@ACM@addtoaddress: Added            |     | \ACM@linecountL: Rulers now are         |        |
| obeypunctuation code . . . . .       | 90  | continuous . . . . .                    | 100    |
| \@mkauthors@i: Added                 |     | \ACM@linecountR: Rulers now are         |        |
| obeypunctuation code . . . . .       | 93  | continuous . . . . .                    | 100    |
| \@mkauthors@iii: Added               |     | \maketitle: Added date to the           |        |
| obeypunctuation code . . . . .       | 94  | bibstrip in conf proceedings . . . .    | 82     |
| \@mkauthors@iv: Added                |     | Deleted ‘DOI’ from doi numbers . .      | 82     |
| obeypunctuation code . . . . .       | 95  | Rearranged bibstrip . . . . .           | 82     |
| \@subtitlefont: Added                |     | The \terms command is now               |        |
| \normalsize . . . . .                | 88  | obsolete . . . . .                      | 82     |
| \ACM@linecountL: Renamed macro .     | 100 | \terms: The \terms command now          |        |
| \ACM@linecountR: Added macro . .     | 100 | just produces a warning . . . . .       | 72     |
| \ACM@timestamp: Added current page   |     | v1.35                                   |        |
| number . . . . .                     | 100 | General: BibTeX bug fixed: et al. . . . | 35     |
| Added macro (Michael D. Adams) .     | 100 | If the copyright is set to usgov or     |        |
| Added submission id . . . . .        | 100 | rigtsretained, the price is             |        |
| \acmSubmissionID: Added macro . .    | 71  | suppressed . . . . .                    | 76     |
| \city: Added obeypunctuation code    | 91  | \bibstyle@acmauthoryear: Square         |        |
| \country: Added obeypunctuation      |     | brackets for author-year style . . .    | 43     |
| code . . . . .                       | 91  | v1.36                                   |        |
| \department: Added obeypunctuation   |     | General: Added PACMHCI journal          |        |
| code . . . . .                       | 91  | options . . . . .                       | 59     |
| \if@ACM@affiliation@obeypunctuation: |     | Added the possibility to adjust         |        |
| Added macro . . . . .                | 69  | number of author boxes per row          |        |
| \if@ACM@authordraft: Added macro     | 38  | in conference formats . . . . .         | 35     |
| \if@ACM@natbib@override: Deleted     |     | \@ACM@authorsperrrow: Added macro       | 73     |
| macro . . . . .                      | 37  | \@mkauthors@iii: Added                  |        |
| \if@ACM@timestamp: Added macro       |     | authorsperrrow override . . . . .       | 94     |
| (Michael D. Adams) . . . . .         | 38  | \@mkauthors@iv: Added                   |        |
| \institution: Added                  |     | authorsperrrow override . . . . .       | 95     |
| obeypunctuation code . . . . .       | 91  | \if@ACM@authordraft: Corrected          |        |
| firstpagestyle: Added right          |     | typo, thanks to bargteil . . . . .      | 38     |
| linecount for two-column formats     | 104 | v1.37                                   |        |
| Added timestamp (Michael             |     | General: Reduce list indentation        |        |
| D. Adams) . . . . .                  | 104 | (Matthew Fluet) . . . . .               | 58     |
| \maketitle: Fixed the bug with       |     | Set \normalparindent; Reduce list       |        |
| figures on top and bottom of the     |     | indentation (Matthew Fluet) . . . .     | 35     |
| title page, thanks to David Epstein  | 82  | \description: Reduce list               |        |
| \position: Added obeypunctuation     |     | indentation (Matthew Fluet) . . . .     | 59     |
| code . . . . .                       | 91  | \descriptionlabel: Reduce list          |        |
| \postcode: Added obeypunctuation     |     | indentation (Matthew Fluet) . . . .     | 59     |
| code . . . . .                       | 91  | \normalparindent: Set                   |        |
| \state: Added obeypunctuation code   | 91  | \normalparindent (Matthew               |        |
| \streetaddress: Added                |     | Fluet) . . . . .                        | 52     |
| obeypunctuation code . . . . .       | 91  | v1.38                                   |        |
| standardpagestyle: Added right       |     | General: Increase default font size for |        |
| linecount for two-column formats     | 101 | SIGPLAN . . . . .                       | 35, 40 |
| Added timestamp (Michael             |     | v1.39                                   |        |
| D. Adams) . . . . .                  | 101 | \@@authornotemark: Added macro . .      | 97     |
| v1.34                                |     | \authornotemark: Added macro . . .      | 70     |
| \@mkbibcitation: Deleted DOI from    |     | v1.40                                   |        |
| doi numbers . . . . .                | 98  | General: Added ‘textcase’ package . .   | 41     |
| \ACM@linecount@bx: Rulers now are    |     | Added heightrounded to geometry         | 50     |
| continuous . . . . .                 | 99  |                                         |        |

|                                       |     |                                       |     |
|---------------------------------------|-----|---------------------------------------|-----|
| Added new copyright version:          |     | \acmArticle: The default is now       |     |
| licensedcagov . . . . .               | 35  | empty . . . . .                       | 71  |
| Added package cleveref . . . . .      | 35  | \acmArticleSeq: Now acmArticle        |     |
| Added Ross Moore code for             |     | might be empty . . . . .              | 71  |
| glyphtounicode . . . . .              | 53  | \acmBooktitle: Added macro . . . . .  | 67  |
| Bibliography changes . . . . .        | 35  | \editor: Added macro . . . . .        | 67  |
| \@copyrightowner: Added new           |     | \if@ACM@acmthm: Added macro . . . . . | 36  |
| copyright version: licensedcagov .    | 77  | \maketitle: Empty DOI or ISBN are     |     |
| \@copyrightpermission: Added new      |     | not printed (by Michael Ekstrand) .   | 82  |
| copyright version: licensedcagov .    | 78  |                                       |     |
| \@mkauthors@i: Switched to            |     | v1.45                                 |     |
| MakeTextUppercase . . . . .           | 93  | \@folioblob: Switched                 |     |
| \@parfont: Switched to                |     | \bfseries\sffamily to                 |     |
| MakeTextUppercase . . . . .           | 107 | \sffamily\bfseries . . . . .          | 104 |
| \ACM@linecount@bx: Work around a      |     | \@parfont: Switched                   |     |
| bug in xcolor: looks like cmyk        |     | \bfseries\sffamily to                 |     |
| colors in boxes do not work . . . .   | 99  | \sffamily\bfseries . . . . .          | 107 |
| \ccdesc@parse@finish: Added           |     | \@titlefont: Switched                 |     |
| macro . . . . .                       | 75  | \bfseries\sffamily to                 |     |
| \city: We now do not print this even  |     | \sffamily\bfseries . . . . .          | 88  |
| in SIG . . . . .                      | 91  | v1.46                                 |     |
| \country: Fixed bugs with extra       |     | General: Added etoolbox . . . . .     | 35  |
| spaces . . . . .                      | 91  | Bst file bug fixes: label width is    |     |
| \l@section: Redefined macro . . .     | 47  | calculated correctly . . . . .        | 35  |
| \postcode: We now do not print this   |     | Delayed hypersetup since journal      |     |
| even in SIG . . . . .                 | 91  | options may change screen mode .      | 48  |
| \state: We now do not print this even |     | PACM now set screen to true . . . .   | 59  |
| in SIG . . . . .                      | 91  | Restore theorem defs to class file .  | 35  |
| \streetaddress: We now do not         |     | \@mkauthorsaddresses: Introduced      |     |
| print this even in SIG . . . . .      | 91  | macro . . . . .                       | 96  |
| v1.41                                 |     | \@mkbibcitation: Added subtitle . .   | 98  |
| General: Added new badges . . . . .   | 35  | \@printendtopmatter: Made it          |     |
| v1.42                                 |     | \par\bigskip uniformly . . . . .      | 98  |
| General: Deleted ACM badges . . . .   | 35  | \@printtopmatter: Deleted rule . . .  | 86  |
| v1.43                                 |     | \@setauthorsaddresses: Introduced     |     |
| \@startsection: Added                 |     | macro . . . . .                       | 99  |
| \makeatletter . . . . .               | 47  | \ACM@linecount@bx: Rearranged the     |     |
| \country: Added comma before          |     | code to get rid of spurious           |     |
| country for journals . . . . .        | 91  | underfull messages (Benjamin          |     |
| v1.44                                 |     | Byholm) . . . . .                     | 99  |
| General: Added package refcount . .   | 35  | \author: Started counting authors . . | 67  |
| Deleted package cleveref . . . . .    | 35  | \authorsaddresses: Introduced         |     |
| Put theorem defs in a separate style  | 35  | macro . . . . .                       | 69  |
| \@acmBooktitle: Added macro . . . .   | 67  | \country: Corrected spacing for       |     |
| \@acmEditors: Added macro . . . . .   | 67  | institution . . . . .                 | 91  |
| \@editorsAbbrev: Added macro . . .    | 67  | \if@ACM@acmthm: Modified              |     |
| \@folioblob: Suppress the blob if     |     | description . . . . .                 | 36  |
| acmArticleSeq is empty . . . . .      | 104 | \liningnums: Workaround for           |     |
| \@mkbibcitation: If the paper has     |     | compatibility with fontspec . . . .   | 54  |
| just one page, use 'page' instead of  |     | \maketitle: Added authors' addresses  | 82  |
| 'pages' . . . . .                     | 98  | Thankses go before authors'           |     |
| \ACM@restore@pagestyle: Added         |     | addresses . . . . .                   | 82  |
| macro . . . . .                       | 99  | \num@authors: Introduced macro . . .  | 67  |
|                                       |     | v1.47                                 |     |
|                                       |     | General: New journal: THRI . . . . .  | 35  |

|                                       |     |                                       |     |
|---------------------------------------|-----|---------------------------------------|-----|
| v1.48                                 |     |                                       |     |
| General: \citeyear no longer          |     | XeTeX now uses T1 encoding . . .      | 54  |
| behaves like \citeyearpar . . . .     | 49  | \@mkbibcitation: Bug corrected        |     |
| Code prettying (Michael D. Adams)     | 35  | (Ross Moore) . . . . .                | 98  |
| Initial support for Biblatex (Daniel  |     | \@shortauthors: Added submission      |     |
| Thomas) . . . . .                     | 35  | id in anonymous mode . . . . .        | 101 |
| Misc entries in the bibliography no   |     | \ACM@adddotafter: Added macro . .     | 107 |
| longer produce a separate date . .    | 35  | \ACM@NR@adjustedSectionformat:        |     |
| Typos fixed (Jamie Davis) . . . . .   | 35  | Added macro . . . . .                 | 106 |
| \@headfootfont: Deleted               |     | \ACM@NRadjust: Added macro . . . .    | 106 |
| unnecessary switch (Michael           |     | \author: Added submission id in       |     |
| D. Adams) . . . . .                   | 101 | anonymous mode . . . . .              | 67  |
| \@mkabstract: Removed spurious        |     | \if@ACM@nonacm: Added macro . . . .   | 37  |
| indentation if abstract is followed   |     | v1.55                                 |     |
| by an empty line . . . . .            | 97  | General: Now we use purple color for  |     |
| \ACM@timestamp: Fromatting change     |     | links . . . . .                       | 48  |
| (Michael D. Adams) . . . . .          | 100 | Table captions for SIGCHI now use     |     |
| \if@ACM@review: Review mode now       |     | the same font size as figure          |     |
| switches on folios . . . . .          | 36  | captions (Luis Leiva) . . . . .       | 56  |
| \maketitle: Added acmart and          |     | Typo corrected (Zack Weinberg) . .    | 41  |
| version info to pdfcreator tag . . .  | 82  | \@mkbibcitation: Bug corrected . . .  | 98  |
| Added language and doctitle           |     | \maketitle: Fixes topnum . . . . .    | 82  |
| attributes to PDF (Andreas            |     | v1.56                                 |     |
| Reichinger) . . . . .                 | 82  | General: Looks like XeTeX requires    |     |
| Suppressed empty DOI (Serguei         |     | explicit monotype font declaration    | 54  |
| Mokhov) . . . . .                     | 82  | Make two-column layouts flush         |     |
| v1.50                                 |     | (Philip Quinn) . . . . .              | 50  |
| \@copyrightpermission: New            |     | \@marginfigure: Added checking for    |     |
| copyright statements for              |     | description . . . . .                 | 57  |
| iw3c2w3[g] . . . . .                  | 78  | \@mkteasers: Added check for          |     |
| v1.51                                 |     | description . . . . .                 | 97  |
| General: Corrected the bug with price |     | \acksname: Added macro (Philip        |     |
| suppression . . . . .                 | 76  | Quinn) . . . . .                      | 113 |
| Suppress price if the copyright is    |     | \ccsdesc@parse: End the concepts      |     |
| set to iw3c2w3 or iw3c2w3g . . . .    | 76  | list with a period (Philip Quinn) . . | 75  |
| XeTeX now uses OTF fonts              |     | \Description: Added macro . . . . .   | 55  |
| (Joachim Breitner) . . . . .          | 54  | \if@Description@present: Added        |     |
| firstpagestyle: We now use journal    |     | macro . . . . .                       | 55  |
| abbreviation for footers . . . . .    | 104 | \if@undescribed@images: Added         |     |
| standardpagestyle: We now use         |     | macro . . . . .                       | 55  |
| journal abbreviation for footers . .  | 101 | v1.57                                 |     |
| v1.52                                 |     | \ACM@origbaselinestretch: Added       |     |
| \@copyrightowner: Rewording of        |     | check whether the user changed        |     |
| licenses . . . . .                    | 77  | \baselinestretch . . . . .            | 114 |
| \@copyrightpermission: Another        |     | \author: Added warning if \author     |     |
| rewording of copyright statements     |     | has comma . . . . .                   | 67  |
| for iw3c2w3[g] . . . . .              | 78  | \email: Added warning if \author      |     |
| v1.53                                 |     | has comma . . . . .                   | 69  |
| General: Added PACMCGIT, TIOT,        |     | \if@ACM@balance: Added macro . . .    | 37  |
| TDSCI . . . . .                       | 59  | \vspace: Added warning . . . . .      | 114 |
| v1.54                                 |     | v1.58                                 |     |
| General: Added Ross's patch for       |     | General: Added HEALTH. TDSCI is       |     |
| sectioning . . . . .                  | 107 | renamed to TDS . . . . .              | 59  |
| Deleted indent for subsubsection . .  | 107 | Suppressed \addtocounter in pdf       |     |
|                                       |     | subject . . . . .                     | 48  |

|                                           |     |                                                 |     |
|-------------------------------------------|-----|-------------------------------------------------|-----|
| \@dblfloat: Deleted spurious              |     | space warnings . . . . .                        | 55  |
| \vspace warning . . . . .                 | 57  | \@specialsection: Suppress                      |     |
| \@marginfigure: Deleted spurious          |     | warnings about \vspace . . . . .                | 85  |
| \vspace warning . . . . .                 | 57  | v1.67                                           |     |
| \@margintable: Deleted spurious           |     | General: Patching lstlisting and                |     |
| \vspace warning . . . . .                 | 57  | lstlisting* to prevent spurious                 |     |
| \@mkbibcitation: Deleted spurious         |     | space warnings . . . . .                        | 55  |
| \vspace warning . . . . .                 | 98  | \@par font: Deleted redefinitions of            |     |
| \@printendtopmatter: Deleted              |     | sections . . . . .                              | 107 |
| spurious \vspace warning . . . . .        | 98  | \@specialsection: Paragraph inside              |     |
| \@sidebar: Deleted spurious \vspace       |     | group does not print its argument.              |     |
| warning . . . . .                         | 56  | Added a bugfix . . . . .                        | 85  |
| \maketitle: Original \vspace inside       |     | v1.68                                           |     |
| \maketitle . . . . .                      | 82  | General: New command for unindent               |     |
| \vspace: Preserved old versions as        |     | paras . . . . .                                 | 107 |
| \@vspace@orig and                         |     | \@specialsection: Deleted grouping              |     |
| \@vspace@orig . . . . .                   | 114 | altogether . . . . .                            | 85  |
| v1.59                                     |     | v1.69                                           |     |
| \acmConference: Setting                   |     | General: No dots for unindented                 |     |
| \@ACM@journal@bibstrip . . . . .          | 66  | paragraphs . . . . .                            | 107 |
| \acmJournal: Setting                      |     | \@printendtopmatter: Deleted                    |     |
| \@ACM@journal@bibstrip . . . . .          | 66  | grouping . . . . .                              | 98  |
| \if@ACM@journal@bibstrip:                 |     | \@specialsection: Changed dot to                |     |
| Introduced macro . . . . .                | 39  | colon for sigplan . . . . .                     | 85  |
| firstpagestyle: Added logic for           |     | \ACM@linecountR: Do not increase                |     |
| conference papers using journal           |     | numbers in one column format . . . . .          | 100 |
| format . . . . .                          | 104 | \ccsdesc@parse: Use math right                  |     |
| Moved page styles to                      |     | arrow in text . . . . .                         | 75  |
| \AtBeginDocument . . . . .                | 104 | v1.71                                           |     |
| standardpagestyle: Added logic for        |     | \l@subsubsection: Bug fixed (thanks             |     |
| conference papers using journal           |     | to Andrew Black) . . . . .                      | 47  |
| format . . . . .                          | 101 | v1.72                                           |     |
| Moved page styles to                      |     | General: Added hyperxmp . . . . .               | 48  |
| \AtBeginDocument . . . . .                | 101 | \author: Added \detokenize                      |     |
| v1.60                                     |     | (Kuldeep S. Meel) . . . . .                     | 67  |
| \@headfootfont: Moved to                  |     | \maketitle: Do not andify authors               |     |
| footnotesize . . . . .                    | 101 | for pdf metadata (Scott Pakin) . . . . .        | 82  |
| v1.61                                     |     | v1.73                                           |     |
| \@typeset@author@bx: Added                |     | General: Patching minted and minted*            |     |
| \normalbaselines . . . . .                | 94  | to prevent spurious space                       |     |
| v1.64                                     |     | warnings . . . . .                              | 55  |
| \ACM@linecount@bx: Bug fix: made          |     | \@ACM@checkaffil: Added macro . . . . .         | 93  |
| the spacing on the left and the           |     | \@ACM@resetaffil: Added macro . . . . .         | 93  |
| right size equal . . . . .                | 99  | \@mkauthors@i: Check the presence               |     |
| \if@ACM@maketitle@typeset:                |     | of required elements for                        |     |
| Introduced macro . . . . .                | 59  | affiliations . . . . .                          | 93  |
| \maketitle: Added a switch setting to     |     | \@mkauthors@iii: Check the                      |     |
| show that \maketitle is typeset . . . . . | 82  | presence of required elements for               |     |
| v1.65                                     |     | affiliations . . . . .                          | 94  |
| \@mkauthorsaddresses: Deleted             |     | \@mkauthors@iv: Check the presence              |     |
| cs@addpunct . . . . .                     | 96  | of required elements for                        |     |
| v1.66                                     |     | affiliations . . . . .                          | 95  |
| General: Patching algorithm and           |     | \city: Check the presence in affil . . . . .    | 91  |
| algorithm* to prevent spurious            |     | \country: Check the presence in affil . . . . . | 91  |

|                                                                                                                                                                  |     |                                                                                                |     |
|------------------------------------------------------------------------------------------------------------------------------------------------------------------|-----|------------------------------------------------------------------------------------------------|-----|
| \if@ACM@citypresent: Added macro                                                                                                                                 | 93  | \@mktitle@iii: Added                                                                           |     |
| \if@ACM@countrypresent: Added macro                                                                                                                              | 93  | \translatedtitle and \translatedsubtitle                                                       | 89  |
| \if@ACM@instpresent: Added macro                                                                                                                                 | 93  | \@mktitle@iv: Added                                                                            |     |
| \institution: Check the presence in affil                                                                                                                        | 91  | \translatedtitle and \translatedsubtitle                                                       | 90  |
| \maketitle: Do not check again the presense of address fields                                                                                                    | 82  | \@mktranslatedabstract: Added macro                                                            | 98  |
| v1.74                                                                                                                                                            |     | \@mktranslatedkeywords: Added macro                                                            | 70  |
| General: Changed the order of font loading                                                                                                                       | 54  | \@translatedabstracts: Added macro                                                             | 45  |
| v1.75                                                                                                                                                            |     | \@translatedkeywords: Added macro                                                              | 45  |
| \@ACM@checkaffil: Changed warning to error for country                                                                                                           | 93  | \@translatedsubtitle: Added macro                                                              | 45  |
| \@beginmaketitlehook: Introduced macro                                                                                                                           | 82  | \@translatedtitle: Added macro                                                                 | 44  |
| \AtBeginMaketitle: Introduced macro                                                                                                                              | 82  | \ACM@lang@check: Added macro                                                                   | 44  |
| \maketitle: Added \@beginmaketitlehook                                                                                                                           | 82  | \ACM@languages: Introduced macro                                                               | 38  |
| v1.76                                                                                                                                                            |     | \maketitle: l13n                                                                               | 82  |
| General: Moved hyperxmp before hyperref, see <a href="https://github.com/borisveytsman/acmart/issues/425">https://github.com/borisveytsman/acmart/issues/425</a> | 48  | translatedabstract: Added macro                                                                | 45  |
| \author: Added code for orcid links                                                                                                                              | 67  | \translatedkeywords: Added macro                                                               | 45  |
| \if@ACM@pbalance: Added macro                                                                                                                                    | 37  | \translatedsubtitle: Added macro                                                               | 45  |
| \maketitle: Put \par inside group for keywords                                                                                                                   | 82  | \translatedtitle: Added macro                                                                  | 44  |
| \orcid: Added code for orcid links                                                                                                                               | 69  | v1.85                                                                                          |     |
| standardpagestyle: Fixed bug with no line numbers for nonacm                                                                                                     | 101 | General: Added CC licenses                                                                     | 76  |
| v1.77                                                                                                                                                            |     | \@acmengagemetadata: Introduced macro                                                          | 82  |
| \@mkauthorsaddresses: New separator of institutions                                                                                                              | 96  | \@copyrightowner: Added CC licenses                                                            | 77  |
| v1.78                                                                                                                                                            |     | \@copyrightpermission: Added CC licenses                                                       | 78  |
| \@mkauthors@i: Unboxing                                                                                                                                          |     | \@typesetengagemetadata: Introduced macro                                                      | 99  |
| \mktitle@bx                                                                                                                                                      | 93  | \if@ACM@engage: Introduced macro                                                               | 39  |
| \@mkauthors@iii: Unboxing                                                                                                                                        |     | \maketitle: acmengage                                                                          | 82  |
| \mktitle@bx                                                                                                                                                      | 94  | \setcctype: Added macro                                                                        | 77  |
| \@mkteasers: Unboxing \mktitle@bx                                                                                                                                | 97  | \setengagemetadata: Introduced macro                                                           | 82  |
| \@printtopmatter: Added processing the overflowing title box                                                                                                     | 86  | v1.86                                                                                          |     |
| \@specialsection: Again suppressed \vspace warning                                                                                                               | 85  | \country: Error if country is empty                                                            | 91  |
| v1.82                                                                                                                                                            |     | standardpagestyle: Special treatment of ACM Engage materials                                   | 101 |
| \anon: Introduced macro                                                                                                                                          | 81  | v1.87                                                                                          |     |
| v1.83                                                                                                                                                            |     | General: Added ‘framed’ package for acmcp                                                      | 41  |
| General: Use babel for multilanguage papers                                                                                                                      | 43  | No numbering sections for ACMCP                                                                | 108 |
| \@mkabstract: l13n                                                                                                                                               | 97  | \@ACM@copyright@check@cc: Added macro                                                          | 78  |
| \@mktitle@i: Added \translatedtitle and \translatedsubtitle                                                                                                      | 89  | \@copyrightpermission: CC licenses now are allowed only for non-acm or ACM engage publications | 78  |

|                                                                    |    |                                                                          |     |
|--------------------------------------------------------------------|----|--------------------------------------------------------------------------|-----|
| \@mkauthors@i: Special treatment for<br>acmcp . . . . .            | 93 | firstpagestyle: Special treatment<br>for acmcp . . . . .                 | 104 |
| \@mktitle@i: Special treatment for<br>acmcp . . . . .              | 89 | \maketitle: CC license are allowed<br>for non-acm publications . . . . . | 82  |
| \acmArticleType: Introduced macro                                  | 74 | \set@ACM@acmcpbox: Added macro . .                                       | 85  |
| \acmCodeLink: Added possibility to<br>have several links . . . . . | 74 | standardpagestyle: Special<br>treatment of ACMCP . . . . .               | 101 |
| Introduced macro . . . . .                                         | 74 |                                                                          |     |
| \acmDataLink: Introduced macro . .                                 | 75 | v1.88                                                                    |     |
| Now this is the same as the code link                              | 75 | \@mktitle@i: Moved down title for<br>acmcp . . . . .                     | 89  |
| \if@ACM@acmcp: Introduced macro . .                                | 39 |                                                                          |     |

## Index

Numbers written in italic refer to the page where the corresponding entry is described; numbers underlined refer to the code line of the definition; numbers in roman refer to the code lines where the entry is used.

| Symbols                                                         |                                                                        |                                                                                                                       |
|-----------------------------------------------------------------|------------------------------------------------------------------------|-----------------------------------------------------------------------------------------------------------------------|
| \\$ . . . . .                                                   | 2162, 2166                                                             | \@ACM@engagetrue . . . 223                                                                                            |
| \- . . . . .                                                    | 610                                                                    | \@ACM@institution@separator . . 873, 876, 951, 2779                                                                   |
| \@ 1854, 1866, 1869, 1872, 1877, 1975, 1996, 2009               |                                                                        | . . . 2755, 2756, 2761                                                                                                |
| \@authornotemark . . . . .                                      | 1590, 2773                                                             | \@ACM@instpresentfalse . . . . . 867, 870                                                                             |
| \@par . . . . .                                                 | 476, 533                                                               | . . . . . 2586                                                                                                        |
| \@ACM@acmcpbox . . . . .                                        | 2226, 2230, 3049, 3168                                                 | \@ACM@instpresenttrue . . . . . 2489, 2500, 2580                                                                      |
| \@ACM@acmcpfalse . . . . .                                      | 169                                                                    | \@ACM@journal@bibstripfalse . . . . . 232, 1442                                                                       |
| \@ACM@acmcptrue . . . . .                                       | 226                                                                    | \@ACM@journal@bibstriptrue . . . . . 2944, 2964, 2974,                                                                |
| \@ACM@addtoaddress . . . . .                                    | 2477, 2505, 2506, 2508                                                 | . . . . . 230, 1428                                                                                                   |
| \@ACM@authorsperrrow . . . . .                                  | 1677, 2652, 2653, 2705, 2706                                           | \@ACM@journalfalse . . . . . 211, 213, 215, 217, 219, 222                                                             |
| \@ACM@badge@skip . . . . .                                      | 1621, 2318, 2414, 2418, 2424, 2436, 2446, 2452, 2461                   | \@ACM@journaltrue . . . . . 203, 205, 207, 209, 225                                                                   |
| \@ACM@badge@width . . . . .                                     | 1618, 2317, 2322, 2413, 2417, 2423, 2438, 2445, 2447, 2450, 2462, 2465 | \@ACM@labelwidth 1001, 1004, 1012, 1017, 1043                                                                         |
| \@ACM@badgefalse . . . . .                                      | 1617                                                                   | \@ACM@maketitle@typesetfalse . . . . . 1050                                                                           |
| \@ACM@badgetrue 1623, 1628                                      |                                                                        | \@ACM@maketitle@typesettrue . . . . . 2073                                                                            |
| \@ACM@balancefalse . . . . .                                    | 3401, 3425, 3427, 3429, 3441, 3445                                     | \@ACM@manuscriptfalse 198                                                                                             |
| \@ACM@checkaffil 2197, 2590, 2621, 2626, 2688, 2693, 2733, 2738 |                                                                        | \@ACM@manuscripttrue 196                                                                                              |
| \@ACM@citypresentfalse . . . . .                                | 2587                                                                   | \@ACM@newfontsfalse . . . . . 831, 834, 837                                                                           |
| \@ACM@citypresenttrue . . . . .                                 | 2491, 2505, 2582                                                       | \@ACM@newfontstrue . . . . . 828                                                                                      |
| \@ACM@color@frame . . . . .                                     | 2223                                                                   | \@ACM@printacmreffalse . . . . . 95, 227                                                                              |
| \@ACM@commabox . . . . .                                        | 2477, 2481, 2482                                                       | \@ACM@printfoliostrue 78                                                                                              |
| \@ACM@copyright@check@cc . . . . .                              | 1888, 2027                                                             | \@ACM@resetaffil . . . . . 2585, 2620, 2625, 2687, 2692, 2732, 2737                                                   |
| \@ACM@countrypresentfalse . . . . .                             | 2588                                                                   | \@ACM@reviewtrue . . . . . 140                                                                                        |
| \@ACM@countrypresenttrue . . . . .                              | 2496, 2508, 2584                                                       | \@ACM@screentrue 1166, 1210, 1216, 1226, 1232                                                                         |
| \@ACM@engagefalse . . . . .                                     | 167                                                                    | \@ACM@sigchiamodeffalse . . . . . 200                                                                                 |
|                                                                 |                                                                        | \@ACM@sigchiamodetrue 220                                                                                             |
|                                                                 |                                                                        | \@ACM@timestamptrue 139                                                                                               |
|                                                                 |                                                                        | \@ACM@title@width . . . . . 1620, 2411, 2413, 2414, 2417, 2418, 2429, 2443, 2445, 2446, 2454                          |
|                                                                 |                                                                        | \@DeclareACMFormat 38, 39, 40, 41, 42, 43, 44, 45, 46, 47, 48, 49                                                     |
|                                                                 |                                                                        | \@Description@presentfalse . . . . . 873, 876, 951, 2779                                                              |
|                                                                 |                                                                        | \@Description@presenttrue . . . . . 476, 515, 533, 542, 3499                                                          |
|                                                                 |                                                                        | \@M . . . . . 476, 515, 533, 542, 3499                                                                                |
|                                                                 |                                                                        | \@abstract 1648, 2787, 2794                                                                                           |
|                                                                 |                                                                        | \@acmArticle . . . . . 1596, 1599, 2161, 2812, 2813, 2941, 2944, 2964, 2974, 2985, 3053, 3096, 3115, 3125, 3135, 3172 |
|                                                                 |                                                                        | \@acmArticlePage . . . . . 2940, 2958, 2959, 2968, 2971, 2978, 2982                                                   |
|                                                                 |                                                                        | \@acmArticleSeq 1598, 3079                                                                                            |
|                                                                 |                                                                        | \@acmBadgeL@image . . . . . 1630, 1632, 2315, 2317, 2412, 2421, 2423, 2448, 2450                                      |
|                                                                 |                                                                        | \@acmBadgeL@url . . . . . 1629, 1631, 2316, 2422, 2449                                                                |
|                                                                 |                                                                        | \@acmBadgeR@image . . . . . 1625, 1627, 2320, 2322, 2416, 2435, 2438, 2463, 2465                                      |
|                                                                 |                                                                        | \@acmBadgeR@url . . . . . 1624, 1626, 2321, 2437, 2464                                                                |
|                                                                 |                                                                        | \@acmBooktitle . . . . . 1448, 2130, 2151, 2828                                                                       |
|                                                                 |                                                                        | \@acmCodeDataLink . . . . . 1738, 1739, 1741, 1743, 2235, 2236                                                        |
|                                                                 |                                                                        | \@acmDOI . . . . . 1614, 2153, 2156, 2163, 2167, 2836, 2997, 2999, 3021, 3023, 3054, 3173                             |
|                                                                 |                                                                        | \@acmEditors 1456, 1457, 1458, 1461, 2829, 2830                                                                       |
|                                                                 |                                                                        | \@acmISBN . . . . . 1612, 2165                                                                                        |
|                                                                 |                                                                        | \@acmMonth 1602, 1604, 2161                                                                                           |
|                                                                 |                                                                        | \@acmNumber . . . . . 1594, 2825, 2964, 2974, 2985, 3052, 3115, 3125, 3135, 3171                                      |
|                                                                 |                                                                        | \@acmPrice 1608, 2162, 2166                                                                                           |
|                                                                 |                                                                        | \@acmPubDate . . . . . 1604, 2825, 2964,                                                                              |

|                                                                                                              |                                                                                                                                                                                                                                                                                                                                                                                                                                                                                                                                                                      |                                                                                                                                                                                                                                                                                                                                                                                                                                                                                                                                                                                             |
|--------------------------------------------------------------------------------------------------------------|----------------------------------------------------------------------------------------------------------------------------------------------------------------------------------------------------------------------------------------------------------------------------------------------------------------------------------------------------------------------------------------------------------------------------------------------------------------------------------------------------------------------------------------------------------------------|---------------------------------------------------------------------------------------------------------------------------------------------------------------------------------------------------------------------------------------------------------------------------------------------------------------------------------------------------------------------------------------------------------------------------------------------------------------------------------------------------------------------------------------------------------------------------------------------|
| 2974, 2985, 3054,<br>3116, 3126, 3136, 3173                                                                  | \@article@string ...<br>... 2812, 2825, 2833                                                                                                                                                                                                                                                                                                                                                                                                                                                                                                                         | \@copyrightyear ....<br>... 2045, 2137, 2139                                                                                                                                                                                                                                                                                                                                                                                                                                                                                                                                                |
| \@acmSubmissionID ..<br>..... 1482,<br>1483, 1502, 1503,<br>1610, 2921, 2922, 2932                           | \@author .....<br>1481, 1487, 1494,<br>2606, 2671, 2718, 2762                                                                                                                                                                                                                                                                                                                                                                                                                                                                                                        | \@currbox .... 980, 981, 982                                                                                                                                                                                                                                                                                                                                                                                                                                                                                                                                                                |
| \@acmVolume .....<br>1592, 2825, 2963,<br>2973, 2984, 3052,<br>3114, 3124, 3134, 3171                        | \@authorfont 2538, 2543,<br>2547, 2550, 2553,<br>2556, 2559, 2562,<br>2565, 2568, 2608, 2644                                                                                                                                                                                                                                                                                                                                                                                                                                                                         | \@currentaffiliation<br>2645, 2648, 2670,<br>2677, 2678, 2681,<br>2684, 2685, 2690,<br>2717, 2724, 2725,<br>2727, 2729, 2730, 2735                                                                                                                                                                                                                                                                                                                                                                                                                                                          |
| \@acmYear .. 1600, 1607,<br>2046, 2130, 2161, 2816                                                           | \@authornotemark ...<br>... 1582, 1588, 2772                                                                                                                                                                                                                                                                                                                                                                                                                                                                                                                         | \@currentaffiliations<br>..... 2574,<br>2575, 2576, 2578,<br>2604, 2616, 2617, 2623                                                                                                                                                                                                                                                                                                                                                                                                                                                                                                         |
| \@acmdefinitionbodyfont<br>... 3312, 3324, 3338                                                              | \@authornotes .....<br>... 1579, 1583, 2093                                                                                                                                                                                                                                                                                                                                                                                                                                                                                                                          | \@currentauthors ...<br>..... 2572, 2573,<br>2603, 2607, 2608,<br>2610, 2644, 2647,<br>2669, 2671, 2672,<br>2674, 2716, 2718,<br>2719, 2721, 2772, 2773                                                                                                                                                                                                                                                                                                                                                                                                                                     |
| \@acmdefinitionheadfont<br>... 3314, 3326, 3340                                                              | \@authorsaddresses .<br>..... 1554,<br>2102, 2241, 2767, 2846                                                                                                                                                                                                                                                                                                                                                                                                                                                                                                        | \@currentlabel . 560, 574                                                                                                                                                                                                                                                                                                                                                                                                                                                                                                                                                                   |
| \@acmdefinitionindent<br>... 3313, 3325, 3339                                                                | \@auxout ..... 646                                                                                                                                                                                                                                                                                                                                                                                                                                                                                                                                                   | \@dblarg ..... 462                                                                                                                                                                                                                                                                                                                                                                                                                                                                                                                                                                          |
| \@acmdefinitionnotefont<br>... 3315, 3327, 3343                                                              | \@begindocumenthook 642                                                                                                                                                                                                                                                                                                                                                                                                                                                                                                                                              | \@dblfloat ..... 963                                                                                                                                                                                                                                                                                                                                                                                                                                                                                                                                                                        |
| \@acmengagemetadata<br>... 2067, 2069, 2849                                                                  | \@beginmaketitlehook<br>... 2063, 2066, 2072                                                                                                                                                                                                                                                                                                                                                                                                                                                                                                                         | \@department .. 1532, 1533                                                                                                                                                                                                                                                                                                                                                                                                                                                                                                                                                                  |
| \@acmownedfalse ....<br>.... 1797, 1800,<br>1803, 1809, 1813,<br>1816, 1819, 1822,<br>1828, 1831, 1835, 1839 | \@botnum ..... 2216                                                                                                                                                                                                                                                                                                                                                                                                                                                                                                                                                  | \@dotsep ..... 3279                                                                                                                                                                                                                                                                                                                                                                                                                                                                                                                                                                         |
| \@acmownedtrue ....<br>... 1784, 1793, 1825                                                                  | \@citestyle ..... 308                                                                                                                                                                                                                                                                                                                                                                                                                                                                                                                                                | \@editorsAbbrev ....<br>... 1455, 1460, 2830                                                                                                                                                                                                                                                                                                                                                                                                                                                                                                                                                |
| \@acmplainbodyfont .<br>... 3280, 3292, 3306                                                                 | \@classname .....<br>24, 26, 35, 53, 55,<br>56, 61, 63, 64, 69,<br>71, 72, 77, 80, 81,<br>86, 88, 89, 94, 100,<br>101, 105, 109, 114,<br>116, 117, 122, 124,<br>125, 130, 132, 133,<br>138, 142, 143, 161,<br>171, 177, 183, 260,<br>419, 443, 829, 832,<br>835, 872, 881, 884,<br>954, 1167, 1211,<br>1217, 1227, 1233,<br>1423, 1425, 1472,<br>1527, 1541, 1635,<br>1641, 1646, 1653,<br>1655, 1656, 1659,<br>1661, 1662, 1665,<br>1673, 1675, 1676,<br>1678, 1679, 1727,<br>1775, 1890, 1894,<br>1897, 2592, 2595,<br>2598, 2768, 2782,<br>2809, 3503, 3506, 3513 | \@empty ..... 155,<br>234, 378, 418, 466,<br>1439, 1457, 1479,<br>1482, 1500, 1502,<br>1507, 1508, 1514,<br>1638, 1639, 1695,<br>1696, 1702, 1709,<br>1738, 1747, 1773,<br>2064, 2097, 2102,<br>2153, 2162, 2165,<br>2166, 2167, 2178,<br>2181, 2187, 2191,<br>2235, 2238, 2241,<br>2275, 2315, 2320,<br>2412, 2416, 2421,<br>2432, 2435, 2448,<br>2456, 2463, 2473,<br>2495, 2574, 2607,<br>2615, 2616, 2671,<br>2677, 2684, 2718,<br>2724, 2729, 2767,<br>2775, 2812, 2817,<br>2829, 2836, 2921,<br>2932, 2997, 2999,<br>3021, 3023, 3053,<br>3054, 3172, 3173,<br>3283, 3315, 3464, 3481 |
| \@acmplainheadfont .<br>... 3282, 3294, 3308                                                                 | \@clubpenalty ..... 521                                                                                                                                                                                                                                                                                                                                                                                                                                                                                                                                              |                                                                                                                                                                                                                                                                                                                                                                                                                                                                                                                                                                                             |
| \@acmplainindent ...<br>... 3281, 3293, 3307                                                                 | \@concepts . 1747, 1759,<br>1773, 2181, 2183, 2201                                                                                                                                                                                                                                                                                                                                                                                                                                                                                                                   |                                                                                                                                                                                                                                                                                                                                                                                                                                                                                                                                                                                             |
| \@acmplainnotefont .<br>... 3283, 3295, 3311                                                                 | \@copyrightowner ...<br>..... 1848, 2137                                                                                                                                                                                                                                                                                                                                                                                                                                                                                                                             |                                                                                                                                                                                                                                                                                                                                                                                                                                                                                                                                                                                             |
| \@adddotafter .....<br>3187, 3188, 3190,<br>3202, 3217, 3221, 3274                                           | \@copyrightpermission<br>... 1904, 2113, 2125                                                                                                                                                                                                                                                                                                                                                                                                                                                                                                                        |                                                                                                                                                                                                                                                                                                                                                                                                                                                                                                                                                                                             |
| \@additionalaffiliation<br>..... 1528, 1529                                                                  |                                                                                                                                                                                                                                                                                                                                                                                                                                                                                                                                                                      |                                                                                                                                                                                                                                                                                                                                                                                                                                                                                                                                                                                             |
| \@addpunct . 2759, 2845,<br>2846, 3274, 3275, 3395                                                           |                                                                                                                                                                                                                                                                                                                                                                                                                                                                                                                                                                      |                                                                                                                                                                                                                                                                                                                                                                                                                                                                                                                                                                                             |
| \@addspaceafter .... 3275                                                                                    |                                                                                                                                                                                                                                                                                                                                                                                                                                                                                                                                                                      |                                                                                                                                                                                                                                                                                                                                                                                                                                                                                                                                                                                             |
| \@affiliationfont ..<br>.... 2539, 2544,<br>2548, 2551, 2554,<br>2557, 2560, 2563,<br>2566, 2569, 2621, 2644 |                                                                                                                                                                                                                                                                                                                                                                                                                                                                                                                                                                      |                                                                                                                                                                                                                                                                                                                                                                                                                                                                                                                                                                                             |
| \@afterheading . 507, 2219                                                                                   |                                                                                                                                                                                                                                                                                                                                                                                                                                                                                                                                                                      |                                                                                                                                                                                                                                                                                                                                                                                                                                                                                                                                                                                             |
| \@afterindentfalse .<br>..... 453, 2218                                                                      |                                                                                                                                                                                                                                                                                                                                                                                                                                                                                                                                                                      |                                                                                                                                                                                                                                                                                                                                                                                                                                                                                                                                                                                             |
| \@afterindenttrue .. 451                                                                                     |                                                                                                                                                                                                                                                                                                                                                                                                                                                                                                                                                                      |                                                                                                                                                                                                                                                                                                                                                                                                                                                                                                                                                                                             |

|                                          |                        |                                           |                                             |
|------------------------------------------|------------------------|-------------------------------------------|---------------------------------------------|
| <code>\@endfloatbox</code> . . . . .     | 966                    | <code>\@journalCode</code> . . . . .      | 1404, 1408, 1412,                           |
| <code>\@endpfalse</code> . . . . .       | 3397                   |                                           | 1416, 1420, 1431,                           |
| <code>\@endwidenfloatbox</code>          | 966, 974               | 1217, 1227, 1233, 1423                    | 2824, 2963, 2973,                           |
| <code>\@finalstrut</code> . . . . .      | 565, 578               | <code>\@journalCode@nr</code> . . .       | 2984, 3114, 3124, 3134                      |
| <code>\@float</code> . . . . .           | 968                    | . . . 1051, 1123, 1429                    | <code>\@keywords</code> . . . . . 1637,     |
| <code>\@flushglue</code> . . . . .       | 3231                   | <code>\@journalName</code> . . . . .      | 1638, 1639, 2187,                           |
| <code>\@fnsymbol</code> . . . . .        | 2083                   | . . . . . 1125, 1129,                     | 2189, 2202, 2238, 2239                      |
| <code>\@folio@ht</code> . . . . .        |                        | 1133, 1137, 1141,                         | <code>\@latex@error</code> . . . . . 352    |
|                                          | 3059, 3086, 3092, 3093 | 1145, 1149, 1154,                         | <code>\@empty</code> . . . . . 1650, 2787   |
| <code>\@folio@max</code>                 | 3059, 3082, 3083       | 1158, 1162, 1169,                         | <code>\@listI</code> . . . . . 1025, 1029   |
| <code>\@folio@voffset</code>             | 3059, 3088             | 1173, 1177, 1181,                         | <code>\@listi</code> . . . . . 1022, 1029   |
| <code>\@folio@wd</code> . . . . .        | 3059,                  | 1186, 1190, 1194,                         | <code>\@listii</code> . . . . . 1030        |
|                                          | 3093, 3094, 3121, 3131 | 1198, 1203, 1207,                         | <code>\@listiii</code> . . . . . 1033       |
| <code>\@folioblob</code> . . . . .       | 3079,                  | 1213, 1219, 1223,                         | <code>\@listiv</code> . . . . . 1035        |
|                                          | 3118, 3120, 3128, 3129 | 1229, 1235, 1239,                         | <code>\@listv</code> . . . . . 1037         |
| <code>\@footnotemark</code> . . . . .    | 582, 2081              | 1243, 1248, 1252,                         | <code>\@listvi</code> . . . . . 1039        |
| <code>\@footnotemark@nolink</code>       |                        | 1256, 1260, 1264,                         | <code>\@m</code> . . . . . 464              |
|                                          | 582, 2081              | 1268, 1272, 1276,                         | <code>\@makefnmark</code> . . . 555,        |
| <code>\@footnotetext</code> . . . . .    |                        | 1280, 1284, 1288,                         | 580, 2085, 2090, 2094                       |
|                                          | 556, 583, 2082         | 1292, 1296, 1300,                         | <code>\@makefntext</code> . . . . .         |
| <code>\@footnotetext@nolink</code>       |                        | 1304, 1308, 1312,                         | . . 555, 564, 577, 2096                     |
|                                          | 583, 2082              | 1316, 1320, 1324,                         | <code>\@marginfigure</code> . . 946, 947    |
| <code>\@for</code> . . . . .             | 284                    | 1328, 1332, 1336,                         | <code>\@margintable</code> . . 957, 958     |
| <code>\@formatdoi</code> . . . . .       | 1887,                  | 1340, 1344, 1348,                         | <code>\@minipagefalse</code> . . 789, 976   |
|                                          | 2156, 2163, 2167,      | 1353, 1358, 1362,                         | <code>\@minus</code> 3207, 3211, 3215,      |
|                                          | 2836, 2997, 2999,      | 1366, 1371, 1375,                         | 3219, 3223, 3228,                           |
|                                          | 3021, 3023, 3054, 3173 | 1379, 1383, 1387,                         | 3303, 3305, 3335, 3337                      |
| <code>\@fps</code> . . . . .             | 967                    | 1391, 1395, 1399,                         | <code>\@mkabstract</code> . . 2177, 2786    |
| <code>\@fpsadddefault</code> . . . . .   | 967                    | 1403, 1407, 1411,                         | <code>\@mkauthors</code> 2086, 2088, 2510   |
| <code>\@gobble</code> . . . . .          | 306, 350               | 1415, 1419, 1430,                         | <code>\@mkauthors@i</code> . . . . .        |
| <code>\@hangfrom</code> . . . . .        | 475, 532               | 1431, 2149, 3052, 3171                    | . . . . . 2514, 2516,                       |
| <code>\@headfootfont</code> . . . . .    |                        | <code>\@journalNameShort</code> . . . . . | 2518, 2520, 2534, 2602                      |
|                                          | 2934, 2958,            | . . . . . 1126, 1130,                     | <code>\@mkauthors@ii</code> . . . . . 2637  |
|                                          | 2959, 2960, 2961,      | 1134, 1138, 1142,                         | <code>\@mkauthors@iii</code> . . . . .      |
|                                          | 2967, 2970, 2977,      | 1146, 1150, 1155,                         | . . . . . 2522, 2524,                       |
|                                          | 2981, 2989, 2990,      | 1159, 1164, 1170,                         | 2526, 2528, 2532, 2649                      |
|                                          | 2996, 2998, 3002,      | 1174, 1178, 1182,                         | <code>\@mkauthors@iv</code> 2530, 2702      |
|                                          | 3005, 3013, 3014,      | 1187, 1191, 1195,                         | <code>\@mkauthorsaddresses</code>           |
|                                          | 3020, 3022, 3026, 3029 | 1199, 1204, 1208,                         | . . . . . 1555, 2746                        |
| <code>\@idxitem</code> . . . . .         | 3496                   | 1214, 1220, 1224,                         | <code>\@mkbibcitation</code> 2212, 2803     |
| <code>\@ifnextchar</code> . . . . .      | 1532                   | 1230, 1236, 1240,                         | <code>\@mkteasers</code> . . . 2086, 2774   |
| <code>\@ifnotempty</code> . . . . .      | 2051                   | 1244, 1249, 1253,                         | <code>\@mktitle</code> . . . . . 2086, 2331 |
| <code>\@ifnum</code> . . . . .           | 322, 324               | 1257, 1261, 1265,                         | <code>\@mktitle@i</code> 2334, 2336,        |
| <code>\@ifstar</code> . . . . .          | 460                    | 1269, 1273, 1277,                         | 2338, 2340, 2354, 2407                      |
| <code>\@ifundefined</code> . . . . .     |                        | 1281, 1285, 1289,                         | <code>\@mktitle@ii</code> . . . . . 2441    |
|                                          | 3348, 3351, 3354,      | 1293, 1297, 1301,                         | <code>\@mktitle@iii</code> . . . . .        |
|                                          | 3357, 3360, 3364, 3367 | 1305, 1309, 1313,                         | . . . . . 2342, 2344,                       |
| <code>\@iiiparbox</code> . . . . .       | 792                    | 1317, 1321, 1325,                         | 2346, 2348, 2352, 2441                      |
| <code>\@indextitlestyle</code> . . . . . | 3495                   | 1329, 1333, 1337,                         | <code>\@mktitle@iv</code> . . 2350, 2469    |
| <code>\@input</code> . . . . .           | 544                    | 1341, 1345, 1349,                         | <code>\@mktranslatedabstract</code>         |
| <code>\@insideauthorgroupfalse</code>    |                        | 1354, 1359, 1363,                         | . . . . . 441, 2796                         |
|                                          | 1470, 1522             | 1367, 1372, 1376,                         | <code>\@mktranslatedkeywords</code>         |
| <code>\@insideauthorgrouptrue</code>     |                        | 1380, 1384, 1388,                         | . . . . . 438, 1556                         |
|                                          | 1477                   | 1392, 1396, 1400,                         | <code>\@mpargs</code> . . . . . 792         |

|                                                                                                                                                                                                                                                                                                                                                                                                                                                                         |                                                                   |                                                                                                                                                                                                                                            |
|-------------------------------------------------------------------------------------------------------------------------------------------------------------------------------------------------------------------------------------------------------------------------------------------------------------------------------------------------------------------------------------------------------------------------------------------------------------------------|-------------------------------------------------------------------|--------------------------------------------------------------------------------------------------------------------------------------------------------------------------------------------------------------------------------------------|
| \@mparswitchfalse .. 738                                                                                                                                                                                                                                                                                                                                                                                                                                                | \@printendtopmatter .. 2217, 2838                                 | \@subtitlenotes .... 1569, 1573, 1576, 2092                                                                                                                                                                                                |
| \@mpfootins ..... 569, 570, 784, 785, 787                                                                                                                                                                                                                                                                                                                                                                                                                               | \@printpermissionfalse ..... 1795                                 | \@svsec . 466, 469, 475, 490                                                                                                                                                                                                               |
| \@mpfootnotetext ... 568                                                                                                                                                                                                                                                                                                                                                                                                                                                | \@printpermissiontrue ... 1782, 1791, 1807                        | \@svsechd ... 488, 516, 536                                                                                                                                                                                                                |
| \@ne . 310, 314, 318, 320, 632, 2863, 2869, 2873                                                                                                                                                                                                                                                                                                                                                                                                                        | \@printtopmatter ... 2087, 2274                                   | \@teaser ..... 2049, 2776                                                                                                                                                                                                                  |
| \@nil ..... 329                                                                                                                                                                                                                                                                                                                                                                                                                                                         | \@proofindent ..... 3374, 3384, 3394                              | \@teaserfigures .... 2047, 2049, 2775, 2780                                                                                                                                                                                                |
| \@nobreakfalse . 509, 549                                                                                                                                                                                                                                                                                                                                                                                                                                               | \@proofnamefont .... 3373, 3383, 3395                             | \@tempa ..... 284, 285, 287, 289, 291, 293, 295, 297, 299, 301, 303, 305, 307, 309, 311, 313, 315, 317, 319, 321, 323, 325, 327, 329, 332, 334, 336, 338, 340, 342, 1506, 1507, 1694, 1695, 2494, 2495, 2615, 3464, 3480, 3481, 3483, 3487 |
| \@noskipsecfalse ... 513                                                                                                                                                                                                                                                                                                                                                                                                                                                | \@received . 1693, 1696, 1697, 1699, 1702, 1703, 1705, 1709, 1710 | \@tempb ..... 285, 287, 289, 291, 293, 295, 297, 299, 301, 303, 305, 307, 309, 311, 313, 315, 317, 319, 321, 323, 325, 327, 332, 334, 336, 338, 340, 342, 3482, 3483, 3486, 3487                                                           |
| \@noskipsectrue .... 510                                                                                                                                                                                                                                                                                                                                                                                                                                                | \@restonecolfalse .. 3493                                         | \@tempboxa . 792, 2284, 2286                                                                                                                                                                                                               |
| \@pages@word ..... 2806, 2826, 2833                                                                                                                                                                                                                                                                                                                                                                                                                                     | \@restonecoltrue ... 3493                                         | \@tempc . 330, 331, 333, 335, 337, 339, 341, 343                                                                                                                                                                                           |
| \@par ..... 2099, 2106                                                                                                                                                                                                                                                                                                                                                                                                                                                  | \@rightskip ... 3231, 3232                                        | \@tempcnta . 3079, 3080, 3082, 3083, 3085, 3087                                                                                                                                                                                            |
| \@parboxrestore .... 573                                                                                                                                                                                                                                                                                                                                                                                                                                                | \@saveabstract 1644, 1645                                         | \@tempdima ..... 2280, 2281, 2282, 2288, 2289, 2290, 3086, 3087, 3088, 3090                                                                                                                                                                |
| \@parfont ..... 3221, 3225, 3230, 3235                                                                                                                                                                                                                                                                                                                                                                                                                                  | \@saveteaser .. 2048, 2049                                        | \@tempskipa ..... 450, 452, 453, 458, 471, 472, 503, 504, 506, 518, 519, 528, 529                                                                                                                                                          |
| \@permissionCodeOne .... 1127, 1131, 1135, 1139, 1143, 1147, 1151, 1156, 1160, 1165, 1171, 1175, 1179, 1183, 1188, 1192, 1196, 1200, 1205, 1209, 1215, 1221, 1225, 1231, 1237, 1241, 1245, 1250, 1254, 1258, 1262, 1266, 1270, 1274, 1278, 1282, 1286, 1290, 1294, 1298, 1302, 1306, 1310, 1314, 1318, 1322, 1326, 1330, 1334, 1338, 1342, 1346, 1350, 1355, 1360, 1364, 1368, 1373, 1377, 1381, 1385, 1389, 1393, 1397, 1401, 1405, 1409, 1413, 1417, 1421, 1432, 2161 | \@setaddresses .... 2771                                          | \@textbottom ..... 793                                                                                                                                                                                                                     |
| \@permissionCodeTwo ..... 1152, 1184, 1201, 1246, 1351, 1356, 1369, 1433                                                                                                                                                                                                                                                                                                                                                                                                | \@setauthorsaddresses ... 2106, 2241, 2846                        | \@textsuperscript .. 580, 2085, 2090                                                                                                                                                                                                       |
| \@plus ..... 542, 550, 793, 3207, 3211, 3215, 3219, 3223, 3228, 3302, 3304, 3334, 3336, 3392, 3497                                                                                                                                                                                                                                                                                                                                                                      | \@setengagemetadate ..... 2070, 2848                              | \@texttop ..... 794                                                                                                                                                                                                                        |
| \@printcopyrightfalse ..... 1796, 1808                                                                                                                                                                                                                                                                                                                                                                                                                                  | \@setthanks ... 2099, 2845                                        | \@thefnmark . 561, 575, 580, 2085, 2090, 2095                                                                                                                                                                                              |
| \@printcopyrighttrue ..... 1780, 1792                                                                                                                                                                                                                                                                                                                                                                                                                                   | \@shortauthors .... 2929, 2952, 2960, 2968, 2978, 2990, 3014      | \@title ... 1562, 2200, 2431, 2455, 2472, 2816                                                                                                                                                                                             |
|                                                                                                                                                                                                                                                                                                                                                                                                                                                                         | \@sidebar ..... 942, 943                                          | \@titlefont 2357, 2420, 2430, 2442, 2454, 2470                                                                                                                                                                                             |
|                                                                                                                                                                                                                                                                                                                                                                                                                                                                         | \@specialsection ... 1558, 2182, 2188, 2244                       | \@titlenotes ..... 1560, 1564, 1567, 2091                                                                                                                                                                                                  |
|                                                                                                                                                                                                                                                                                                                                                                                                                                                                         | \@ssect ..... 461, 527                                            | \@tochangmeasure 480, 493                                                                                                                                                                                                                  |
|                                                                                                                                                                                                                                                                                                                                                                                                                                                                         | \@startPage .... 1633, 2275, 2276, 2278, 2926                     |                                                                                                                                                                                                                                            |
|                                                                                                                                                                                                                                                                                                                                                                                                                                                                         | \@startsection . 447, 539, 3206, 3210, 3214, 3218, 3222, 3227     |                                                                                                                                                                                                                                            |
|                                                                                                                                                                                                                                                                                                                                                                                                                                                                         | \@starttoc ..... 539                                              |                                                                                                                                                                                                                                            |
|                                                                                                                                                                                                                                                                                                                                                                                                                                                                         | \@subparfont ..... 3260                                           |                                                                                                                                                                                                                                            |
|                                                                                                                                                                                                                                                                                                                                                                                                                                                                         | \@subsecfont .. 3213, 3235                                        |                                                                                                                                                                                                                                            |
|                                                                                                                                                                                                                                                                                                                                                                                                                                                                         | \@subsubsecfont 3217, 3235                                        |                                                                                                                                                                                                                                            |
|                                                                                                                                                                                                                                                                                                                                                                                                                                                                         | \@subtitle . 1463, 1571, 2432, 2433, 2456, 2457, 2473, 2474, 2817 |                                                                                                                                                                                                                                            |
|                                                                                                                                                                                                                                                                                                                                                                                                                                                                         | \@subtitelfont .... 2382, 2433, 2457, 2474                        |                                                                                                                                                                                                                                            |

|                             |               |                        |                               |
|-----------------------------|---------------|------------------------|-------------------------------|
| \@toclevel .....            | 464           | 959, 965, 2080,        | 195, 201, 235, 593,           |
| \@tocline ...               | 552, 553, 554 | 2246, 2805, 2840, 3502 | 678, 757, 795, 915,           |
| \@topnum .....              | 2214          | \@width .....          | 773, 780                      |
| \@translatedabstracts       |               | \@xp .....             | 546, 547                      |
| . 439, 446, 2178, 2179      |               | \@xsect ....           | 501, 502, 538                 |
| \@translatedkeywords        |               | \@ .....               | 663, 672, 1482,               |
| . 436, 438, 2191, 2192      |               | 1741, 2031, 2137,      | 2948, 3066, 3105,             |
| \@translatedsubtitle        |               | 2142, 2157, 2162,      | 3151, 3240, 3284,             |
| ..... 433,                  |               | 2166, 2236, 2808,      | 3316, 3375, 3402, 3423        |
| 435, 2433, 2457, 2474       |               | 2816, 2868, 3054, 3173 | \ACM@lang@check ....          |
| \@translatedtitle 430,      |               | \{ .....               | 292                           |
| 432, 2431, 2455, 2472       |               | \} .....               | 292                           |
| \@typeset@author@bx         |               | \_ ...                 | 1453, 1755, 1765,             |
| ..... 2641,                 |               | 2137, 2139, 2162,      | 2137, 2139, 2162,             |
| 2695, 2701, 2740, 2745      |               | 2812, 2813, 2831, 2926 | 2868, 2869, 2872, 2873        |
| \@typeset@author@line       |               |                        | \ACM@linecount@bx ..          |
| 2571, 2605, 2629, 2634      |               |                        | ... 2859, 2879, 2909          |
| \@typesetengagementmetadata |               |                        | \ACM@linecount@bxht           |
| ..... 2175, 2847            |               |                        | 2861, 2867, 2870, 2871        |
| \@undefined .....           |               |                        | \ACM@linecountL ....          |
| . 642, 860, 1450, 2063      |               |                        | .... 2875, 2950,              |
| \@undescribed@imagesfalse   |               |                        | 2953, 2958, 2961,             |
| ..... 869                   |               |                        | 2967, 2969, 2977,             |
| \@undescribed@imagetrue     |               |                        | 2979, 2989, 2992,             |
| .. 880, 883, 953, 2781      |               |                        | 2996, 3002, 3013,             |
| \@vspace 874, 877, 885,     |               |                        | 3016, 3020, 3026,             |
| 887, 889, 891, 893,         |               |                        | 3048, 3107, 3118,             |
| 895, 897, 899, 901,         |               |                        | 3119, 3129, 3130,             |
| 903, 943, 948, 958,         |               |                        | 3138, 3141, 3146, 3167        |
| 964, 2079, 2245,            |               |                        | \ACM@linecountR . 2882,       |
| 2271, 2804, 2839,           |               |                        | 2980, 2982, 2990,             |
| 2842, 3501, 3503, 3509      |               |                        | 2993, 3000, 3007,             |
| \@vspace@acm .....          |               |                        | 3014, 3017, 3024,             |
| ... 2271, 2842, 3509        |               |                        | 3031, 3139, 3142, 3147        |
| \@vspace@orig 874, 877,     |               |                        | \ACM@mk@linecount ..          |
| 885, 887, 889, 891,         |               |                        | .... 2864, 2877,              |
| 893, 895, 897, 899,         |               |                        | 2892, 2894, 2896,             |
| 901, 903, 943, 948,         |               |                        | 2898, 2900, 2902, 2904        |
| 958, 964, 2079,             |               |                        | \ACM@NR@adjustedSectionFormat |
| 2245, 2804, 2839, 3501      |               |                        | ..... 3185, 3194              |
| \@vspacer 875, 878, 886,    |               |                        | \ACM@NRadjust .....           |
| 888, 890, 892, 894,         |               |                        | 3176, 3209, 3213,             |
| 896, 898, 900, 902,         |               |                        | 3217, 3221, 3225, 3230        |
| 904, 944, 949, 959,         |               |                        | \ACM@origbaselinestretch      |
| 965, 2080, 2246,            |               |                        | ..... 3511                    |
| 2272, 2805, 2840,           |               |                        | \ACM@ps@headings ...          |
| 2843, 3502, 3506, 3510      |               |                        | ..... 2853, 2857              |
| \@vspacer@acm .....         |               |                        | \ACM@ps@myheadings .          |
| ... 2272, 2843, 3510        |               |                        | ..... 2852, 2856              |
| \@vspacer@orig . 875,       |               |                        | \ACM@ps@plain . 2851, 2855    |
| 878, 886, 888, 890,         |               |                        | \ACM@restore@pagestyle        |
| 892, 894, 896,              |               |                        | ..... 2851                    |
| 898, 900, 902,              |               |                        | \ACM@sect@format ...          |
| 904, 944, 949,              |               |                        | ..... 3195, 3197              |

|                              |                             |                               |
|------------------------------|-----------------------------|-------------------------------|
| \ACM@sect@format@ ..         | \advance .....              | \authornotemark . 14, 1586    |
| ... 3184, 3197, 3199         | 1026, 1031, 1034,           | \authors .....                |
| \ACM@sect@format@null        | 1036, 1038, 1040,           | 1484, 1489, 1496,             |
| ..... 3198, 3199             | 1474, 1476, 1733,           | 2195, 2207, 2209, 2816        |
| \ACM@timestamp ....          | 2281, 2289, 2409,           | \authorsaddresses 14, 1554    |
| 2912, 3039, 3152, 3157       | 2413, 2414, 2417,           |                               |
| \acmArticle .... 14, 1596    | 2418, 2445, 2446,           | <b>B</b>                      |
| \acmArticleSeq . 15, 1598    | 2631, 2651, 2668,           | \balance ..... 3452           |
| \acmArticleType . 20, 1712   | 2704, 2715, 2869,           | \baselineskip .....           |
| \acmBadgeL ..... 15, 1628    | 2873, 3083, 3085, 3088      | .... 2123, 2422,              |
| \acmBadgeR ..... 15, 1623    | \affiliation .... 10,       | 2437, 2449, 2464,             |
| \acmBooktitle ... 9, 1448    | 1521, 2614, 2684, 2729      | 2870, 3207, 3208,             |
| \acmCodeLink 20, 1737, 1744  | \and ..... 1461, 1494,      | 3211, 3212, 3215,             |
| \acmConference .. 9, 1434    | 1496, 1511, 1517,           | 3219, 3223, 3302,             |
| \acmConference@date          | 2605, 2610, 2612,           | 3303, 3304, 3305,             |
| .... 1437, 2132,             | 2623, 2629, 2642,           | 3334, 3335, 3336, 3337        |
| 3004, 3007, 3028, 3031       | 2676, 2695, 2701,           | \baselinestretch ...          |
| \acmConference@name          | 2723, 2740, 2745, 2761      | ... 3511, 3512, 3514          |
| 1436, 1450, 1451, 1452       | \andify ..... 2207,         | \begin . 19, 2878, 2908, 3089 |
| \acmConference@shortname     | 2208, 2572, 2575, 2830      | \begingroup .... 473,         |
| 1435, 1439, 1440,            | \anon ..... 24, 2057        | 516, 530, 539, 631,           |
| 1452, 1453, 2132,            | anonsuppress (env.) ... 24  | 2078, 2510, 3177, 3456        |
| 3003, 3006, 3027, 3030       | \apptocmd ..... 3503, 3506  | \bfseries .....               |
| \acmConference@venue         | \AtBeginDocument . 78,      | 1041, 2119, 2360,             |
| .... 1438, 2132,             | 95, 227, 635, 643,          | 2362, 2364, 2368,             |
| 3004, 3007, 3028, 3031       | 1002, 1804, 1810,           | 2370, 2372, 2374,             |
| \acmDataLink ... 20, 1744    | 1832, 1836, 1840,           | 2376, 2378, 2380,             |
| \acmDefinition .... 3333     | 2858, 2935, 3099, 3200      | 2559, 2562, 2814,             |
| \acmDOI ..... 15, 1614       | \AtBeginEnvironment         | 3096, 3235, 3236,             |
| \acmISBN ..... 15, 1612      | ... 873, 876, 885,          | 3250, 3251, 3253,             |
| \acmJournal ..... 9, 1427    | 887, 889, 891, 893,         | 3254, 3256, 3257,             |
| \acmMonth ..... 14, 1602     | 895, 897, 899, 901, 903     | 3258, 3259, 3263,             |
| \acmNumber ..... 14, 1594    | \AtBeginMaketitle 31, 2066  | 3264, 3267, 3268,             |
| \acmplain ..... 3301         | \AtEndDocument ....         | 3270, 3271, 3294, 3326        |
| \acmPrice 15, 1608, 1804,    | .... 871, 1639,             | \bgroup . 446, 943, 947,      |
| 1810, 1832, 1836, 1840       | 1663, 1708, 1773,           | 958, 964, 1529,               |
| \acmSubmissionID 15, 1610    | 2222, 2766, 3449, 3512      | 1556, 2181, 2187,             |
| \acmVolume ..... 14, 1592    | \AtEndEnvironment 879, 882  | 2228, 2641, 2678,             |
| \acmYear ..... 14, 1600      | \AtEndPreamble . 608,       | 2681, 2742, 2751,             |
| \addcontentsline 280,        | 861, 3345, 3399, 3465       | 2776, 2786, 2803, 2815        |
| 482, 495, 2788, 3458         | \author ..... 10,           | \bibfont ..... 282            |
| \additionalaffiliation       | 1471, 2075, 2076, 2810      | \bibliofont ..... 282         |
| ..... 11, 1528               | \author@bx 2637, 2643, 2646 | \bibliographystyle . 641      |
| \addpenalty ..... 458        | \author@bx@sep ....         | \bibsection ..... 278         |
| \addresses .....             | .... 2639, 2646,            | \bibstyle 306, 308, 350, 646  |
| 1479, 1481, 1486,            | 2651, 2668, 2704, 2715      | \bibstyle@acmauthoryear       |
| 1493, 1524, 1544,            | \author@bx@wd .....         | ..... 356                     |
| 1582, 1588, 1590,            | .... 2638, 2641,            | \bibstyle@acmnumeric 362      |
| 2634, 2701, 2745, 2764       | 2650, 2651, 2653,           | \bigskip .. 1710, 2312,       |
| \addto .. 381, 392, 400, 408 | 2659, 2661, 2663,           | 2440, 2468, 2476,             |
| \addtocounter .. 586, 1767   | 2665, 2668, 2703,           | 2701, 2745, 2776, 2841        |
| \addtolength 1010, 1011,     | 2704, 2706, 2712, 2715      | \box ..... 981, 2296,         |
| 1012, 1016, 1017, 2870       | \authornote .....           | 2298, 2300, 2302,             |
| \addvspace ..... 458, 550    | . 14, 1528, 1580, 2811      | 2304, 2306, 2308,             |

|                                                                                                              |                                                                                                                                                                                                       |                                                                                                                                                                                                                                                                                                                                                                                                                                                                                                                                                                                                                                                                                                                                                                                                                                                                                                                                                                                                                                                                                                                                                                                    |
|--------------------------------------------------------------------------------------------------------------|-------------------------------------------------------------------------------------------------------------------------------------------------------------------------------------------------------|------------------------------------------------------------------------------------------------------------------------------------------------------------------------------------------------------------------------------------------------------------------------------------------------------------------------------------------------------------------------------------------------------------------------------------------------------------------------------------------------------------------------------------------------------------------------------------------------------------------------------------------------------------------------------------------------------------------------------------------------------------------------------------------------------------------------------------------------------------------------------------------------------------------------------------------------------------------------------------------------------------------------------------------------------------------------------------------------------------------------------------------------------------------------------------|
| 2310, 2312, 2326,<br>2328, 2646, 3049, 3168                                                                  | 835, 881, 884, 954,<br>1472, 1541, 1635,<br>1679, 2782, 3503, 3506                                                                                                                                    | \DeclareTextFontCommand<br>..... 862                                                                                                                                                                                                                                                                                                                                                                                                                                                                                                                                                                                                                                                                                                                                                                                                                                                                                                                                                                                                                                                                                                                                               |
| <b>C</b>                                                                                                     | \ClassWarningNoLine<br>. 872, 1641, 1665,<br>1775, 2592, 2595, 2768                                                                                                                                   | \def 24, 38, 147, 153, 237,<br>239, 241, 243, 245,<br>247, 249, 251, 253,<br>255, 257, 285, 287,<br>289, 291, 293, 295,<br>297, 299, 301, 303,<br>305, 307, 309, 310,<br>311, 312, 313, 314,<br>315, 316, 317, 318,<br>319, 321, 323, 325,<br>327, 328, 332, 334,<br>336, 338, 340, 342,<br>430, 433, 436, 439,<br>442, 447, 463, 488,<br>502, 526, 527, 536,<br>539, 552, 553, 554,<br>555, 557, 568, 580,<br>586, 587, 588, 589,<br>590, 610, 641, 772,<br>779, 781, 793, 943,<br>947, 958, 964, 967,<br>971, 974, 992, 993,<br>994, 995, 1025,<br>1030, 1033, 1035,<br>1037, 1039, 1125,<br>1126, 1127, 1129,<br>1130, 1131, 1133,<br>1134, 1135, 1137,<br>1138, 1139, 1141,<br>1142, 1143, 1145,<br>1146, 1147, 1149,<br>1150, 1151, 1152,<br>1154, 1155, 1156,<br>1158, 1159, 1160,<br>1162, 1164, 1165,<br>1169, 1170, 1171,<br>1173, 1174, 1175,<br>1177, 1178, 1179,<br>1181, 1182, 1183,<br>1184, 1186, 1187,<br>1188, 1190, 1191,<br>1192, 1194, 1195,<br>1196, 1198, 1199,<br>1200, 1201, 1203,<br>1204, 1205, 1207,<br>1208, 1209, 1213,<br>1214, 1215, 1219,<br>1220, 1221, 1223,<br>1224, 1225, 1229,<br>1230, 1231, 1235,<br>1236, 1237, 1239,<br>1240, 1241, 1243, |
| \c@footnote ..... 2083                                                                                       | \ClassWarningNoLine<br>. 872, 1641, 1665,<br>1775, 2592, 2595, 2768                                                                                                                                   |                                                                                                                                                                                                                                                                                                                                                                                                                                                                                                                                                                                                                                                                                                                                                                                                                                                                                                                                                                                                                                                                                                                                                                                    |
| \c@secnumdepth ....<br>465, 479, 483, 492, 496                                                               | \clearpage ..... 2287                                                                                                                                                                                 |                                                                                                                                                                                                                                                                                                                                                                                                                                                                                                                                                                                                                                                                                                                                                                                                                                                                                                                                                                                                                                                                                                                                                                                    |
| \captionseenglish ... 381                                                                                    | \clubpenalty ... 515, 521                                                                                                                                                                             |                                                                                                                                                                                                                                                                                                                                                                                                                                                                                                                                                                                                                                                                                                                                                                                                                                                                                                                                                                                                                                                                                                                                                                                    |
| \captionsetup .. 907,<br>909, 911, 913, 922,<br>924, 927, 929, 932,<br>934, 944, 950, 959, 2777              | \CodelineIndex ..... 16                                                                                                                                                                               |                                                                                                                                                                                                                                                                                                                                                                                                                                                                                                                                                                                                                                                                                                                                                                                                                                                                                                                                                                                                                                                                                                                                                                                    |
| \captionsfrench .... 392                                                                                     | \Collect@Body 440, 942,<br>946, 957, 1644, 2048                                                                                                                                                       |                                                                                                                                                                                                                                                                                                                                                                                                                                                                                                                                                                                                                                                                                                                                                                                                                                                                                                                                                                                                                                                                                                                                                                                    |
| \captionsgerman .... 400                                                                                     | \color .... 2059, 2121,<br>2868, 2872, 3046, 3165                                                                                                                                                     |                                                                                                                                                                                                                                                                                                                                                                                                                                                                                                                                                                                                                                                                                                                                                                                                                                                                                                                                                                                                                                                                                                                                                                                    |
| \captionsspanish ... 408                                                                                     | \color@begingroup 563, 576                                                                                                                                                                            |                                                                                                                                                                                                                                                                                                                                                                                                                                                                                                                                                                                                                                                                                                                                                                                                                                                                                                                                                                                                                                                                                                                                                                                    |
| \ccdesc@parse@finish 1778                                                                                    | \color@endbox ..... 979                                                                                                                                                                               |                                                                                                                                                                                                                                                                                                                                                                                                                                                                                                                                                                                                                                                                                                                                                                                                                                                                                                                                                                                                                                                                                                                                                                                    |
| \ccsdesc ..... 16, 1749                                                                                      | \color@endgroup ....<br>..... 566, 579, 790                                                                                                                                                           |                                                                                                                                                                                                                                                                                                                                                                                                                                                                                                                                                                                                                                                                                                                                                                                                                                                                                                                                                                                                                                                                                                                                                                                    |
| \ccsdesc@parse 1750, 1751                                                                                    | \colorbox . 1732, 3046, 3165                                                                                                                                                                          |                                                                                                                                                                                                                                                                                                                                                                                                                                                                                                                                                                                                                                                                                                                                                                                                                                                                                                                                                                                                                                                                                                                                                                                    |
| \ccsdesc@parse@end .<br>..... 1750, 1778                                                                     | \colorlet ..... 1716,<br>1718, 1720, 1722, 1724                                                                                                                                                       |                                                                                                                                                                                                                                                                                                                                                                                                                                                                                                                                                                                                                                                                                                                                                                                                                                                                                                                                                                                                                                                                                                                                                                                    |
| \ccsdesc@parse@finish<br>..... 1772, 1778                                                                    | \columnsep ..... 3494                                                                                                                                                                                 |                                                                                                                                                                                                                                                                                                                                                                                                                                                                                                                                                                                                                                                                                                                                                                                                                                                                                                                                                                                                                                                                                                                                                                                    |
| CCSXML (env.) ..... 16                                                                                       | \columnseprule .... 3494                                                                                                                                                                              |                                                                                                                                                                                                                                                                                                                                                                                                                                                                                                                                                                                                                                                                                                                                                                                                                                                                                                                                                                                                                                                                                                                                                                                    |
| \centering ..... 543,<br>576, 662, 671,<br>951, 960, 2442,<br>2454, 2643, 2700, 3095                         | \columnwidth ... 572,<br>773, 965, 2703, 2742                                                                                                                                                         |                                                                                                                                                                                                                                                                                                                                                                                                                                                                                                                                                                                                                                                                                                                                                                                                                                                                                                                                                                                                                                                                                                                                                                                    |
| \changes ..... 146                                                                                           | \contentsnamefont .. 543                                                                                                                                                                              |                                                                                                                                                                                                                                                                                                                                                                                                                                                                                                                                                                                                                                                                                                                                                                                                                                                                                                                                                                                                                                                                                                                                                                                    |
| \cite ... 624, 625, 636, 640                                                                                 | \copy ..... 2482                                                                                                                                                                                      |                                                                                                                                                                                                                                                                                                                                                                                                                                                                                                                                                                                                                                                                                                                                                                                                                                                                                                                                                                                                                                                                                                                                                                                    |
| \citeA ..... 630                                                                                             | \copyright ..... 2137                                                                                                                                                                                 |                                                                                                                                                                                                                                                                                                                                                                                                                                                                                                                                                                                                                                                                                                                                                                                                                                                                                                                                                                                                                                                                                                                                                                                    |
| \citealt ..... 629                                                                                           | \copyrightpermissionfootnoterule<br>..... 772                                                                                                                                                         |                                                                                                                                                                                                                                                                                                                                                                                                                                                                                                                                                                                                                                                                                                                                                                                                                                                                                                                                                                                                                                                                                                                                                                                    |
| \citeANP ..... 626                                                                                           | \copyrightyear . 18, 2045                                                                                                                                                                             |                                                                                                                                                                                                                                                                                                                                                                                                                                                                                                                                                                                                                                                                                                                                                                                                                                                                                                                                                                                                                                                                                                                                                                                    |
| \citeauthor ..... 626                                                                                        | \country 11, 1538, 2485, 2760                                                                                                                                                                         |                                                                                                                                                                                                                                                                                                                                                                                                                                                                                                                                                                                                                                                                                                                                                                                                                                                                                                                                                                                                                                                                                                                                                                                    |
| \citeN ..... 624                                                                                             | \csname .... 350, 478,<br>480, 484, 491, 493,<br>497, 526, 546, 547,<br>561, 575, 1488,<br>1495, 1548, 1551,<br>1754, 1755, 1757,<br>1758, 1759, 1760,<br>1761, 1764, 1766,<br>2204, 2206, 3178, 3201 |                                                                                                                                                                                                                                                                                                                                                                                                                                                                                                                                                                                                                                                                                                                                                                                                                                                                                                                                                                                                                                                                                                                                                                                    |
| \citename ..... 637                                                                                          | \CurrentOption ....<br>..... 148, 149,<br>150, 151, 152, 158, 159                                                                                                                                     |                                                                                                                                                                                                                                                                                                                                                                                                                                                                                                                                                                                                                                                                                                                                                                                                                                                                                                                                                                                                                                                                                                                                                                                    |
| \citeNN ..... 627                                                                                            |                                                                                                                                                                                                       |                                                                                                                                                                                                                                                                                                                                                                                                                                                                                                                                                                                                                                                                                                                                                                                                                                                                                                                                                                                                                                                                                                                                                                                    |
| \citeNP ..... 629                                                                                            |                                                                                                                                                                                                       |                                                                                                                                                                                                                                                                                                                                                                                                                                                                                                                                                                                                                                                                                                                                                                                                                                                                                                                                                                                                                                                                                                                                                                                    |
| \citep ..... 625                                                                                             |                                                                                                                                                                                                       |                                                                                                                                                                                                                                                                                                                                                                                                                                                                                                                                                                                                                                                                                                                                                                                                                                                                                                                                                                                                                                                                                                                                                                                    |
| \citestyle ... 25, 348, 368                                                                                  |                                                                                                                                                                                                       |                                                                                                                                                                                                                                                                                                                                                                                                                                                                                                                                                                                                                                                                                                                                                                                                                                                                                                                                                                                                                                                                                                                                                                                    |
| \citeyear ..... 628                                                                                          |                                                                                                                                                                                                       |                                                                                                                                                                                                                                                                                                                                                                                                                                                                                                                                                                                                                                                                                                                                                                                                                                                                                                                                                                                                                                                                                                                                                                                    |
| \citeyearNP ..... 628                                                                                        |                                                                                                                                                                                                       |                                                                                                                                                                                                                                                                                                                                                                                                                                                                                                                                                                                                                                                                                                                                                                                                                                                                                                                                                                                                                                                                                                                                                                                    |
| \citeyearpar ... 627, 640                                                                                    |                                                                                                                                                                                                       |                                                                                                                                                                                                                                                                                                                                                                                                                                                                                                                                                                                                                                                                                                                                                                                                                                                                                                                                                                                                                                                                                                                                                                                    |
| \city .. 11, 1535, 2485, 2757                                                                                |                                                                                                                                                                                                       |                                                                                                                                                                                                                                                                                                                                                                                                                                                                                                                                                                                                                                                                                                                                                                                                                                                                                                                                                                                                                                                                                                                                                                                    |
| \ClassError .....<br>35, 419, 443, 1425,<br>1527, 1646, 1656,<br>1662, 1676, 1727,<br>1897, 2598, 2809, 3513 |                                                                                                                                                                                                       |                                                                                                                                                                                                                                                                                                                                                                                                                                                                                                                                                                                                                                                                                                                                                                                                                                                                                                                                                                                                                                                                                                                                                                                    |
| \ClassInfo .. 161, 260,<br>1423, 1653, 1655,<br>1659, 1661, 1673,<br>1675, 1678, 1890, 1894                  |                                                                                                                                                                                                       |                                                                                                                                                                                                                                                                                                                                                                                                                                                                                                                                                                                                                                                                                                                                                                                                                                                                                                                                                                                                                                                                                                                                                                                    |
| \ClassWarning 26, 171,<br>177, 183, 829, 832,                                                                |                                                                                                                                                                                                       |                                                                                                                                                                                                                                                                                                                                                                                                                                                                                                                                                                                                                                                                                                                                                                                                                                                                                                                                                                                                                                                                                                                                                                                    |
|                                                                                                              | <b>D</b>                                                                                                                                                                                              |                                                                                                                                                                                                                                                                                                                                                                                                                                                                                                                                                                                                                                                                                                                                                                                                                                                                                                                                                                                                                                                                                                                                                                                    |
|                                                                                                              | \day ..... 2924                                                                                                                                                                                       |                                                                                                                                                                                                                                                                                                                                                                                                                                                                                                                                                                                                                                                                                                                                                                                                                                                                                                                                                                                                                                                                                                                                                                                    |
|                                                                                                              | \DeclareNewFootnote<br>..... 776, 778                                                                                                                                                                 |                                                                                                                                                                                                                                                                                                                                                                                                                                                                                                                                                                                                                                                                                                                                                                                                                                                                                                                                                                                                                                                                                                                                                                                    |
|                                                                                                              | \DeclareOptionX ....<br>38, 148, 149, 150,<br>151, 152, 154, 158, 159                                                                                                                                 |                                                                                                                                                                                                                                                                                                                                                                                                                                                                                                                                                                                                                                                                                                                                                                                                                                                                                                                                                                                                                                                                                                                                                                                    |
|                                                                                                              | \DeclareRobustCommand<br>..... 630, 3197                                                                                                                                                              |                                                                                                                                                                                                                                                                                                                                                                                                                                                                                                                                                                                                                                                                                                                                                                                                                                                                                                                                                                                                                                                                                                                                                                                    |

|                   |                   |                              |
|-------------------|-------------------|------------------------------|
| 1244, 1245, 1246, | 1594, 1596, 1598, | 3182, 3184, 3194,            |
| 1248, 1249, 1250, | 1600, 1602, 1604, | 3198, 3205, 3231,            |
| 1252, 1253, 1254, | 1608, 1610, 1612, | 3235, 3236, 3237,            |
| 1256, 1257, 1258, | 1614, 1624, 1625, | 3238, 3244, 3245,            |
| 1260, 1261, 1262, | 1626, 1627, 1629, | 3247, 3248, 3250,            |
| 1264, 1265, 1266, | 1630, 1631, 1632, | 3251, 3253, 3254,            |
| 1268, 1269, 1270, | 1633, 1635, 1637, | 3256, 3257, 3258,            |
| 1272, 1273, 1274, | 1645, 1650, 1681, | 3259, 3260, 3263,            |
| 1276, 1277, 1278, | 1693, 1694, 1729, | 3264, 3267, 3268,            |
| 1280, 1281, 1282, | 1731, 1737, 1743, | 3270, 3271, 3274,            |
| 1284, 1285, 1286, | 1751, 1752, 1778, | 3275, 3280, 3281,            |
| 1288, 1289, 1290, | 1842, 1845, 1846, | 3282, 3283, 3292,            |
| 1292, 1293, 1294, | 1848, 1887, 1888, | 3293, 3294, 3295,            |
| 1296, 1297, 1298, | 1904, 2029, 2045, | 3312, 3313, 3314,            |
| 1300, 1301, 1302, | 2047, 2049, 2066, | 3315, 3324, 3325,            |
| 1304, 1305, 1306, | 2067, 2068, 2072, | 3326, 3327, 3373,            |
| 1308, 1309, 1310, | 2085, 2090, 2099, | 3374, 3383, 3384,            |
| 1312, 1313, 1314, | 2106, 2197, 2227, | 3462, 3464, 3480,            |
| 1316, 1317, 1318, | 2244, 2274, 2331, | 3481, 3482, 3486, 3493       |
| 1320, 1321, 1322, | 2357, 2382, 2407, | \define@boolkey . . . .      |
| 1324, 1325, 1326, | 2441, 2469, 2478, | . . . 51, 59, 67, 75,        |
| 1328, 1329, 1330, | 2485, 2486, 2488, | 84, 92, 104, 108,            |
| 1332, 1333, 1334, | 2489, 2491, 2492, | 112, 120, 128, 136,          |
| 1336, 1337, 1338, | 2494, 2499, 2500, | 1526, 1651, 1657, 1671       |
| 1340, 1341, 1342, | 2504, 2505, 2507, | \define@choicekey . .        |
| 1344, 1345, 1346, | 2508, 2510, 2538, | . 32, 1051, 1712, 1785       |
| 1348, 1349, 1350, | 2539, 2543, 2544, | \define@cmdkey . . . . 1677  |
| 1351, 1353, 1354, | 2547, 2548, 2550, | \definecolor . . . . .       |
| 1355, 1356, 1358, | 2551, 2553, 2554, | . . . 650, 651, 652,         |
| 1359, 1360, 1362, | 2556, 2557, 2559, | 653, 654, 655, 656, 657      |
| 1363, 1364, 1366, | 2560, 2562, 2563, | \department . . . . .        |
| 1367, 1368, 1369, | 2565, 2566, 2568, | . 11, 1532, 2485, 2759       |
| 1371, 1372, 1373, | 2569, 2571, 2573, | \Description . . . . 23, 870 |
| 1375, 1376, 1377, | 2578, 2585, 2590, | \description . . . . . 1042  |
| 1379, 1380, 1381, | 2602, 2603, 2604, | \descriptionlabel . .        |
| 1383, 1384, 1385, | 2606, 2613, 2614, | . . . . . 1041, 1044         |
| 1387, 1388, 1389, | 2615, 2641, 2642, | \detokenize . . . . . 1472   |
| 1391, 1392, 1393, | 2649, 2671, 2677, | \dimexpr . . . . . 962,      |
| 1395, 1396, 1397, | 2684, 2702, 2718, | 981, 3036, 3045, 3164        |
| 1399, 1400, 1401, | 2724, 2729, 2746, | \divide 2653, 2659, 2661,    |
| 1403, 1404, 1405, | 2752, 2753, 2754, | 2663, 2665, 2706, 2712       |
| 1407, 1408, 1409, | 2756, 2757, 2758, | \do . . . . . 284, 610       |
| 1411, 1412, 1413, | 2760, 2761, 2762, | \do@url@hyp . . . . . 610    |
| 1415, 1416, 1417, | 2763, 2771, 2772, | \DocInput . . . . . 20       |
| 1419, 1420, 1421, | 2773, 2774, 2776, | \documentclass 8, 424, 426   |
| 1427, 1429, 1430, | 2786, 2796, 2803, | \dots . . . . . 2166         |
| 1431, 1432, 1433, | 2806, 2807, 2808, | \dp . . . . . 2281, 2289     |
| 1448, 1455, 1456, | 2809, 2812, 2816, |                              |
| 1457, 1463, 1506, | 2838, 2845, 2846, |                              |
| 1528, 1529, 1530, | 2847, 2848, 2854, |                              |
| 1531, 1532, 1533, | 2864, 2875, 2882, |                              |
| 1546, 1554, 1560, | 2929, 2934, 2940, |                              |
| 1561, 1569, 1570, | 3065, 3072, 3077, |                              |
| 1579, 1580, 1592, | 3079, 3176, 3180, |                              |
|                   |                   | <b>E</b>                     |
|                   |                   | \edef . . . . . 148, 149,    |
|                   |                   | 150, 151, 152, 464, 2030     |
|                   |                   | \editor . . . . . 9, 1457    |
|                   |                   | \egroup . . . . . 446,       |
|                   |                   | 791, 945, 956, 960,          |

|                             |                                 |                               |
|-----------------------------|---------------------------------|-------------------------------|
| 972, 978, 1539,             | 2766, 2775, 2780,               | teaserfigure . . . . 18       |
| 1559, 2183, 2189,           | 2787, 2791, 2799,               | translatedabstract            |
| 2243, 2645, 2679,           | 2806, 2812, 2817,               | ..... 21                      |
| 2682, 2745, 2765,           | 2818, 2827, 2829,               | \everypar . . . . . 456,      |
| 2777, 2795, 2816, 2837      | 2836, 2921, 2932,               | 511, 522, 2790, 2798          |
| \else . . . 54, 62, 70, 79, | 2933, 2943, 2954,               | \excludacomment . 1746,       |
| 87, 99, 115, 123,           | 2962, 2972, 2983,               | 3468, 3470, 3474, 3475        |
| 131, 141, 197, 231,         | 2987, 2994, 2997,               | \ExecuteOptionsX . . .        |
| 330, 351, 372, 379,         | 2999, 3001, 3011,               | . . . 50, 58, 66, 74,         |
| 384, 395, 403, 411,         | 3018, 3021, 3023,               | 83, 91, 103, 107,             |
| 457, 464, 467, 479,         | 3025, 3053, 3054,               | 111, 119, 127, 135, 145       |
| 483, 487, 492, 496,         | 3080, 3109, 3113,               | \expandafter 329, 331,        |
| 508, 520, 535, 618,         | 3123, 3133, 3140,               | 643, 792, 1486,               |
| 634, 640, 642, 665,         | 3145, 3153, 3156,               | 1487, 1493, 1494,             |
| 667, 784, 848, 853,         | 3172, 3173, 3181,               | 1548, 1551, 1754,             |
| 879, 882, 912, 952,         | 3205, 3464, 3469,               | 1755, 1757, 1758,             |
| 1418, 1444, 1450,           | 3476, 3485, 3489, 3512          | 1764, 1766, 3178, 3201        |
| 1452, 1459, 1475,           | \email . . . . . 10, 1540,      |                               |
| 1482, 1485, 1491,           | 2613, 2677, 2724, 2763          | <b>F</b>                      |
| 1492, 1502, 1505,           | \emph . . . . . 2149, 2151      | \familydefault . . . . 864    |
| 1510, 1513, 1516,           | \empty . . . . . 2941           | \fancyfoot . . . . . 2955,    |
| 1523, 1543, 1566,           | \EnableCrossrefs . . . . 18     | 2963, 2973, 2984,             |
| 1575, 1581, 1589,           | \end . . . 21, 2880, 2910, 3097 | 2988, 3012, 3039,             |
| 1639, 1654, 1660,           | \end@ACM@color@frame 2222       | 3050, 3051, 3108,             |
| 1663, 1674, 1685,           | \end@dblfloating . . . . . 970  | 3110, 3114, 3124,             |
| 1688, 1698, 1701,           | \end@floating . . . . . 972     | 3134, 3143, 3148,             |
| 1704, 1709, 1740,           | \endcsname 349, 350, 478,       | 3152, 3157, 3169, 3170        |
| 1763, 1768, 1769,           | 480, 484, 491, 493,             | \fancyhead . 2950, 2951,      |
| 1770, 1773, 1892,           | 497, 526, 546, 547,             | 2952, 2953, 2958,             |
| 1896, 2054, 2060,           | 561, 575, 1488,                 | 2959, 2960, 2961,             |
| 2086, 2097, 2101,           | 1495, 1549, 1552,               | 2967, 2969, 2970,             |
| 2102, 2103, 2115,           | 1754, 1755, 1757,               | 2977, 2979, 2980,             |
| 2116, 2124, 2127,           | 1758, 1759, 1760,               | 2981, 2989, 2990,             |
| 2128, 2131, 2138,           | 1761, 1764, 1766,               | 2992, 2993, 2996,             |
| 2143, 2150, 2155,           | 2204, 2206, 3178, 3201          | 2998, 3002, 3005,             |
| 2158, 2159, 2162,           | \enddescription . . . . 1048    | 3013, 3014, 3016,             |
| 2164, 2165, 2166,           | \endgroup . . . 477, 516,       | 3017, 3020, 3022,             |
| 2167, 2178, 2181,           | 534, 549, 2174,                 | 3026, 3029, 3044,             |
| 2186, 2187, 2191,           | 2536, 3180, 3182, 3460          | 3049, 3107, 3118,             |
| 2235, 2238, 2241,           | \endlist . . . . . 1046, 1048   | 3119, 3120, 3128,             |
| 2277, 2315, 2320,           | \endMakeFramed . . . . 1733     | 3129, 3130, 3138,             |
| 2412, 2416, 2421,           | \endminipage . . . . . 781      | 3139, 3141, 3142,             |
| 2432, 2435, 2448,           | \endtrivlist . . . . . 3397     | 3146, 3147, 3163, 3168        |
| 2456, 2463, 2473,           | \enspace . . . . . 3275         | \fancyheadoffset 3036,        |
| 2479, 2480, 2495,           | environments:                   | 3043, 3121, 3131, 3162        |
| 2497, 2498, 2499,           | abstract . . . . . 18           | \fancyhf . . . . . 2937, 3101 |
| 2501, 2503, 2504,           | acks . . . . . 24               | \fancypagestyle 2936, 3100    |
| 2507, 2574, 2591,           | anonsuppress . . . . 24         | \fi . . . . . 56, 64, 72,     |
| 2594, 2597, 2609,           | CCSXML . . . . . 16             | 81, 89, 101, 117,             |
| 2615, 2622, 2643,           | marginfigure . . . . 33         | 125, 133, 143, 156,           |
| 2654, 2664, 2673,           | marginable . . . . . 33         | 175, 181, 194, 199,           |
| 2680, 2689, 2707,           | printonly . . . . . 23          | 228, 233, 258, 259,           |
| 2711, 2720, 2726,           | screenonly . . . . . 23         | 271, 275, 286, 288,           |
| 2734, 2748, 2750,           | sidebar . . . . . 33            | 290, 292, 294, 296,           |

|                     |                              |                                  |
|---------------------|------------------------------|----------------------------------|
| 298, 300, 302, 304, | 2241, 2270, 2279,            | \footnoterule . . . . . 779      |
| 306, 308, 310, 312, | 2291, 2319, 2323,            | \footnotesep . . . 565, 578      |
| 314, 316, 318, 320, | 2324, 2329, 2355,            | \footnotesize 571, 2920,         |
| 322, 324, 326, 328, | 2381, 2406, 2410,            | 2934, 2955, 2963,                |
| 333, 335, 337, 339, | 2415, 2419, 2425,            | 2973, 2984, 2988,                |
| 341, 343, 344, 353, | 2428, 2434, 2439,            | 2996, 3002, 3012,                |
| 355, 369, 374, 377, | 2451, 2453, 2458,            | 3051, 3110, 3114,                |
| 386, 390, 397, 405, | 2466, 2467, 2475,            | 3124, 3134, 3143,                |
| 413, 416, 429, 444, | 2483, 2496, 2497,            | 3148, 3154, 3170, 3500           |
| 448, 454, 459, 464, | 2499, 2501, 2503,            | \footnotetext . . 1565,          |
| 470, 481, 485, 494, | 2504, 2507, 2509,            | 1567, 1574, 1577, 1584           |
| 498, 500, 523, 524, | 2535, 2570, 2577,            | \footnotetextauthorsaddresses    |
| 537, 548, 567, 607, | 2593, 2596, 2600,            | . . . . . 2098, 2105             |
| 611, 620, 638, 640, | 2611, 2627, 2628,            | \footnotetextcopyrightpermission |
| 644, 647, 674, 675, | 2632, 2643, 2666,            | . . . . . 2113, 2117             |
| 676, 754, 770, 788, | 2667, 2675, 2683,            | \footrulewidth . . . .           |
| 814, 826, 857, 858, | 2694, 2713, 2714,            | 2939, 3042, 3103, 3161           |
| 859, 865, 872, 881, | 2722, 2728, 2739,            | \foreignlanguage 432, 435        |
| 884, 938, 939, 955, | 2748, 2750, 2770,            | \format . . . . . 32             |
| 969, 973, 1000,     | 2783, 2785, 2793,            | \FrameCommand . . . . . 1731     |
| 1422, 1441, 1447,   | 2795, 2801, 2806,            | \FrameRestore . . . . . 1733     |
| 1453, 1454, 1462,   | 2813, 2817, 2831,            | \frenchspacing . . . . 3516      |
| 1478, 1483, 1490,   | 2834, 2835, 2836,            | \fulltextwidth . . . .           |
| 1497, 1498, 1503,   | 2874, 2881, 2907,            | . . . . . 961, 965, 981          |
| 1504, 1512, 1518,   | 2911, 2923, 2928,            |                                  |
| 1519, 1520, 1525,   | 2932, 2933, 2942,            |                                  |
| 1545, 1568, 1578,   | 2944, 2945, 2950,            |                                  |
| 1585, 1591, 1607,   | 2951, 2956, 2965,            |                                  |
| 1643, 1647, 1656,   | 2975, 2986, 2988,            |                                  |
| 1662, 1670, 1676,   | 2997, 2999, 3008,            |                                  |
| 1690, 1691, 1700,   | 3009, 3010, 3012,            |                                  |
| 1706, 1707, 1711,   | 3021, 3023, 3032,            |                                  |
| 1725, 1736, 1742,   | 3033, 3034, 3037,            |                                  |
| 1762, 1770, 1771,   | 3040, 3053, 3054,            |                                  |
| 1777, 1798, 1801,   | 3055, 3078, 3097,            |                                  |
| 1805, 1811, 1814,   | 3108, 3111, 3117,            |                                  |
| 1817, 1820, 1823,   | 3127, 3137, 3143,            |                                  |
| 1826, 1829, 1833,   | 3144, 3148, 3149,            |                                  |
| 1837, 1841, 1886,   | 3155, 3158, 3159,            |                                  |
| 1902, 1903, 2044,   | 3172, 3173, 3174,            |                                  |
| 2056, 2062, 2065,   | 3192, 3203, 3205,            |                                  |
| 2076, 2077, 2086,   | 3273, 3278, 3300,            |                                  |
| 2088, 2100, 2107,   | 3332, 3370, 3389,            |                                  |
| 2108, 2109, 2110,   | 3420, 3421, 3446,            |                                  |
| 2114, 2122, 2125,   | 3447, 3453, 3464,            |                                  |
| 2126, 2133, 2134,   | 3472, 3478, 3481,            |                                  |
| 2135, 2140, 2152,   | 3491, 3492, 3493, 3515       |                                  |
| 2157, 2162, 2166,   | \firstpagestyle . . . . 3099 |                                  |
| 2167, 2168, 2169,   | \floatname . . . . . 941     |                                  |
| 2170, 2171, 2172,   | \flushbottom 800, 802,       |                                  |
| 2173, 2175, 2179,   | 804, 806, 808, 811, 813      |                                  |
| 2184, 2185, 2190,   | \footnote . . . . . 2809     |                                  |
| 2193, 2194, 2213,   | \footnotemark 590, 1562,     |                                  |
| 2224, 2237, 2240,   | 1571, 2772, 2773, 2807       |                                  |

  

|                            |                        |          |
|----------------------------|------------------------|----------|
|                            |                        | <b>G</b> |
| \g@addto@macro . 157,      | 432, 435, 438, 446,    |          |
|                            | 1461, 1493, 1496,      |          |
|                            | 1511, 1517, 1524,      |          |
|                            | 1544, 1562, 1564,      |          |
|                            | 1567, 1571, 1573,      |          |
|                            | 1576, 1582, 1583,      |          |
|                            | 1588, 1590, 1699,      |          |
|                            | 1705, 1741, 1759,      |          |
|                            | 1766, 2049, 2053,      |          |
|                            | 2055, 2066, 2069,      |          |
|                            | 2610, 2623, 2674,      |          |
|                            | 2681, 2690, 2721,      |          |
|                            | 2727, 2735, 2772, 2773 |          |
| \gdef . . . . . 156, 1435, | 1436, 1437, 1438,      |          |
|                            | 1440, 1448, 1458,      |          |
|                            | 1460, 1481, 1484,      |          |
|                            | 1486, 1489, 1501,      |          |
|                            | 1509, 1515, 1548,      |          |
|                            | 1551, 1648, 1680,      |          |
|                            | 1697, 1703, 1739,      |          |
|                            | 1755, 1757, 1758,      |          |
|                            | 1764, 2276, 2608,      |          |
|                            | 2612, 2617, 2647,      |          |
|                            | 2648, 2669, 2670,      |          |
|                            | 2672, 2676, 2678,      |          |
|                            | 2685, 2716, 2717,      |          |



|                                                                                                                                                                                                                                                                                                                                                                                                                                                                                                                                                                                                                                                          |                                                                                                                                                                                          |                                                                                                                                                                                                                                                                                                                                                  |
|----------------------------------------------------------------------------------------------------------------------------------------------------------------------------------------------------------------------------------------------------------------------------------------------------------------------------------------------------------------------------------------------------------------------------------------------------------------------------------------------------------------------------------------------------------------------------------------------------------------------------------------------------------|------------------------------------------------------------------------------------------------------------------------------------------------------------------------------------------|--------------------------------------------------------------------------------------------------------------------------------------------------------------------------------------------------------------------------------------------------------------------------------------------------------------------------------------------------|
| <code>\ifdim</code> .. 452, 472, 504,<br>529, 2282, 2290, 2871                                                                                                                                                                                                                                                                                                                                                                                                                                                                                                                                                                                           | 2775, 2787, 2812,<br>2817, 2829, 2836,                                                                                                                                                   | <code>\labelenumii</code> ..... 993                                                                                                                                                                                                                                                                                                              |
| <code>\IfEq</code> ..... 2028, 2034,<br>2035, 2036, 2037,<br>2038, 2039, 2040, 2041                                                                                                                                                                                                                                                                                                                                                                                                                                                                                                                                                                      | 2921, 2932, 2941,<br>2997, 2999, 3021,<br>3023, 3053, 3054,                                                                                                                              | <code>\labelenumiii</code> ..... 994                                                                                                                                                                                                                                                                                                             |
| <code>\IfFileExists</code> 829, 832, 835                                                                                                                                                                                                                                                                                                                                                                                                                                                                                                                                                                                                                 | 3172, 3173, 3178,                                                                                                                                                                        | <code>\labelenumiv</code> ..... 995                                                                                                                                                                                                                                                                                                              |
| <code>\IfInteger</code> ..... 1678                                                                                                                                                                                                                                                                                                                                                                                                                                                                                                                                                                                                                       | 3201, 3205, 3464,                                                                                                                                                                        | <code>\labelsep</code> .....<br>1003, 1011, 1016,<br>1026, 1031, 1034,<br>1036, 1038, 1040, 3394                                                                                                                                                                                                                                                 |
| <code>\ifluatex</code> ..... 849                                                                                                                                                                                                                                                                                                                                                                                                                                                                                                                                                                                                                         | 3481, 3483, 3487, 3512                                                                                                                                                                   | <code>\labelwidth</code> .....<br>1026, 1031, 1034,<br>1036, 1038, 1040, 1043                                                                                                                                                                                                                                                                    |
| <code>\ifNAT@numbers</code> .... 640                                                                                                                                                                                                                                                                                                                                                                                                                                                                                                                                                                                                                     | <code>\ifxetex</code> ..... 844                                                                                                                                                          | <code>\LARGE</code> ..... 2360,<br>2362, 2364, 2380,<br>2391, 2393, 2395,<br>2397, 2399, 2403,<br>2547, 2550, 2565, 3096                                                                                                                                                                                                                         |
| <code>\ifnum</code> 170, 176, 182, 195,<br>464, 465, 479, 483,<br>492, 496, 1640,<br>1664, 1768, 1769,<br>1770, 1774, 1794,<br>1799, 1802, 1806,<br>1812, 1815, 1818,<br>1821, 1824, 1827,<br>1830, 1834, 1838,<br>2076, 2112, 2652,<br>2705, 2747, 2749,<br>2806, 3080, 3082, 3151                                                                                                                                                                                                                                                                                                                                                                      | <code>\ignorespaces</code> .....<br>... 525, 565, 578,<br>870, 1530, 1531,<br>1533, 1546, 2485,<br>2486, 2488, 2490,<br>2491, 2492, 2493,<br>2497, 2754, 2794,<br>2802, 2808, 2816, 3395 | <code>\Large</code> 2232, 2538, 2556,<br>3250, 3251, 3253,<br>3254, 3256, 3270, 3271                                                                                                                                                                                                                                                             |
| <code>\ifPDFTeX</code> ..... 815                                                                                                                                                                                                                                                                                                                                                                                                                                                                                                                                                                                                                         | <code>\immediate</code> ..... 547, 646                                                                                                                                                   | <code>\large</code> 2119, 2543, 2548,<br>2551, 2566, 2568,<br>3244, 3245, 3247, 3248                                                                                                                                                                                                                                                             |
| <code>\IfSubStr</code> ..... 1472, 1541                                                                                                                                                                                                                                                                                                                                                                                                                                                                                                                                                                                                                  | <code>\includecomment</code> ....<br>... 3467, 3471, 3477                                                                                                                                | <code>\lastbox</code> .. 514, 2790, 2798                                                                                                                                                                                                                                                                                                         |
| <code>\ifvmode</code> ..... 2479                                                                                                                                                                                                                                                                                                                                                                                                                                                                                                                                                                                                                         | <code>\includegraphics</code> ...<br>2031, 2317, 2322,<br>2423, 2438, 2450, 2465                                                                                                         | <code>\leaders</code> ..... 2471                                                                                                                                                                                                                                                                                                                 |
| <code>\ifvoid</code> ..... 784                                                                                                                                                                                                                                                                                                                                                                                                                                                                                                                                                                                                                           | <code>\indent</code> ..... 3374                                                                                                                                                          | <code>\leavevmode</code> 448, 2471, 2699                                                                                                                                                                                                                                                                                                         |
| <code>\ifx</code> ..... 155,<br>234, 285, 287, 289,<br>291, 293, 295, 297,<br>299, 301, 303, 305,<br>307, 309, 311, 313,<br>315, 317, 319, 321,<br>323, 325, 327, 332,<br>334, 336, 338, 340,<br>342, 378, 418, 642,<br>1439, 1450, 1452,<br>1457, 1479, 1482,<br>1500, 1502, 1507,<br>1508, 1514, 1587,<br>1639, 1695, 1696,<br>1702, 1709, 1738,<br>1754, 1763, 1773,<br>2063, 2097, 2102,<br>2153, 2162, 2165,<br>2166, 2167, 2178,<br>2181, 2187, 2191,<br>2235, 2238, 2241,<br>2275, 2315, 2320,<br>2412, 2416, 2421,<br>2432, 2435, 2448,<br>2456, 2463, 2473,<br>2495, 2574, 2607,<br>2615, 2616, 2671,<br>2677, 2684, 2718,<br>2724, 2729, 2767, | <code>\input</code> ..... 816                                                                                                                                                            | <code>\leftmargin</code> 1025, 1030,<br>1033, 1035, 1037, 1039                                                                                                                                                                                                                                                                                   |
|                                                                                                                                                                                                                                                                                                                                                                                                                                                                                                                                                                                                                                                          | <code>\InputIfFileExists</code> .. 25                                                                                                                                                    | <code>\leftmargini</code> 1009, 1010,<br>1011, 1012, 1025, 1026                                                                                                                                                                                                                                                                                  |
|                                                                                                                                                                                                                                                                                                                                                                                                                                                                                                                                                                                                                                                          | <code>\institution</code> .....<br>.. 11, 1531, 2485, 2756                                                                                                                               | <code>\leftmarginii</code> .....<br>... 1015, 1016,<br>1017, 1018, 1030, 1031                                                                                                                                                                                                                                                                    |
|                                                                                                                                                                                                                                                                                                                                                                                                                                                                                                                                                                                                                                                          | <code>\interfootnotelinepenalty</code><br>..... 559                                                                                                                                      | <code>\leftmarginiii</code> ....<br>1018, 1019, 1033, 1034                                                                                                                                                                                                                                                                                       |
|                                                                                                                                                                                                                                                                                                                                                                                                                                                                                                                                                                                                                                                          | <code>\interlinepenalty</code> ..<br>..... 476, 533, 559                                                                                                                                 | <code>\leftmarginiv</code> .....<br>1019, 1020, 1035, 1036                                                                                                                                                                                                                                                                                       |
|                                                                                                                                                                                                                                                                                                                                                                                                                                                                                                                                                                                                                                                          | <code>\item</code> ..... 3394, 3496                                                                                                                                                      | <code>\leftmarginv</code> .....<br>1020, 1021, 1037, 1038                                                                                                                                                                                                                                                                                        |
|                                                                                                                                                                                                                                                                                                                                                                                                                                                                                                                                                                                                                                                          | <code>\itshape</code> .....<br>2130, 2132, 3237,<br>3238, 3259, 3260,<br>3280, 3292, 3314, 3383                                                                                          | <code>\leftmarginvi</code> .....<br>... 1021, 1039, 1040                                                                                                                                                                                                                                                                                         |
| <b>J</b>                                                                                                                                                                                                                                                                                                                                                                                                                                                                                                                                                                                                                                                 |                                                                                                                                                                                          |                                                                                                                                                                                                                                                                                                                                                  |
| <code>\jobname</code> ..... 544, 547                                                                                                                                                                                                                                                                                                                                                                                                                                                                                                                                                                                                                     |                                                                                                                                                                                          | <code>\leftskip</code> . 2470, 2743, 3233                                                                                                                                                                                                                                                                                                        |
| <b>K</b>                                                                                                                                                                                                                                                                                                                                                                                                                                                                                                                                                                                                                                                 |                                                                                                                                                                                          |                                                                                                                                                                                                                                                                                                                                                  |
| <code>\kern</code> 772, 773, 779, 780, 2471                                                                                                                                                                                                                                                                                                                                                                                                                                                                                                                                                                                                              |                                                                                                                                                                                          | <code>\let</code> . 306, 308, 320, 322,<br>324, 350, 466, 582,<br>583, 624, 625, 626,<br>627, 628, 629, 632,<br>636, 794, 860, 874,<br>875, 877, 878, 885,<br>886, 887, 888, 889,<br>890, 891, 892, 893,<br>894, 895, 896, 897,<br>898, 899, 900, 901,<br>902, 903, 904, 943,<br>944, 948, 949, 958,<br>959, 964, 965, 966,<br>1029, 1044, 1048, |
| <code>\keywords</code> ..... 16, 1637                                                                                                                                                                                                                                                                                                                                                                                                                                                                                                                                                                                                                    |                                                                                                                                                                                          |                                                                                                                                                                                                                                                                                                                                                  |
| <code>\keywordsname</code> .....<br>371, 373, 383, 385,<br>394, 396, 402, 404,<br>410, 412, 1558, 2188                                                                                                                                                                                                                                                                                                                                                                                                                                                                                                                                                   |                                                                                                                                                                                          |                                                                                                                                                                                                                                                                                                                                                  |
| <b>L</b>                                                                                                                                                                                                                                                                                                                                                                                                                                                                                                                                                                                                                                                 |                                                                                                                                                                                          |                                                                                                                                                                                                                                                                                                                                                  |
| <code>\l@section</code> ..... 552                                                                                                                                                                                                                                                                                                                                                                                                                                                                                                                                                                                                                        |                                                                                                                                                                                          |                                                                                                                                                                                                                                                                                                                                                  |
| <code>\l@subsection</code> .. 552, 553                                                                                                                                                                                                                                                                                                                                                                                                                                                                                                                                                                                                                   |                                                                                                                                                                                          |                                                                                                                                                                                                                                                                                                                                                  |
| <code>\l@subsubsection</code> ... 554                                                                                                                                                                                                                                                                                                                                                                                                                                                                                                                                                                                                                    |                                                                                                                                                                                          |                                                                                                                                                                                                                                                                                                                                                  |
| <code>\labelenumi</code> ..... 992                                                                                                                                                                                                                                                                                                                                                                                                                                                                                                                                                                                                                       |                                                                                                                                                                                          |                                                                                                                                                                                                                                                                                                                                                  |

|                                                                                                                                                                                                                                                                                                                                                                                                                                                                                                                                                                                                                                                                                                                                                            |                                                                                                                                                                                                                                                                                                                                                                                                                                                                                                                                                                                                                                                                                                                                                                                                                                                                                                                                                                                       |                                                                                                                                                                                                                                                                                                                                                                                                                                                                                                                                                                                                                                                                                                                                                                                                                                                                                                                                                                                                                                                                                                                                                                                                                                                                                                                                                                                                                                                                                                                                                                                                                                                                                                                                  |
|------------------------------------------------------------------------------------------------------------------------------------------------------------------------------------------------------------------------------------------------------------------------------------------------------------------------------------------------------------------------------------------------------------------------------------------------------------------------------------------------------------------------------------------------------------------------------------------------------------------------------------------------------------------------------------------------------------------------------------------------------------|---------------------------------------------------------------------------------------------------------------------------------------------------------------------------------------------------------------------------------------------------------------------------------------------------------------------------------------------------------------------------------------------------------------------------------------------------------------------------------------------------------------------------------------------------------------------------------------------------------------------------------------------------------------------------------------------------------------------------------------------------------------------------------------------------------------------------------------------------------------------------------------------------------------------------------------------------------------------------------------|----------------------------------------------------------------------------------------------------------------------------------------------------------------------------------------------------------------------------------------------------------------------------------------------------------------------------------------------------------------------------------------------------------------------------------------------------------------------------------------------------------------------------------------------------------------------------------------------------------------------------------------------------------------------------------------------------------------------------------------------------------------------------------------------------------------------------------------------------------------------------------------------------------------------------------------------------------------------------------------------------------------------------------------------------------------------------------------------------------------------------------------------------------------------------------------------------------------------------------------------------------------------------------------------------------------------------------------------------------------------------------------------------------------------------------------------------------------------------------------------------------------------------------------------------------------------------------------------------------------------------------------------------------------------------------------------------------------------------------|
| 1534, 1535, 1536,<br>1537, 1538, 1638,<br>1744, 1747, 2064,<br>2079, 2080, 2081,<br>2082, 2094, 2095,<br>2096, 2099, 2106,<br>2195, 2209, 2210,<br>2245, 2246, 2271,<br>2272, 2506, 2605,<br>2629, 2695, 2701,<br>2740, 2745, 2804,<br>2805, 2839, 2840,<br>2842, 2843, 2851,<br>2852, 2853, 2855,<br>2856, 2857, 3183,<br>3185, 3187, 3188,<br>3190, 3196, 3199,<br>3202, 3496, 3501,<br>3502, 3509, 3510, 3511                                                                                                                                                                                                                                                                                                                                           | <code>\mathchardef</code> . . . 2679, 2682<br><code>\mbox</code> . . . . . 328<br><code>\mdseries</code> . . 2385, 2387,<br>2389, 2393, 2395,<br>2397, 2399, 2401,<br>2403, 2405, 2560, 2563<br><code>\medskip</code> . . 2249, 2251,<br>2253, 2255, 2633,<br>2635, 2699, 2784, 2814<br><code>\MessageBreak</code> . . . . .<br>172, 178, 184, 185,<br>186, 187, 188, 189,<br>190, 191, 192, 420,<br>421, 422, 423, 425,<br>427, 1666, 1667,<br>1668, 1727, 1898, 1899<br><code>\metadata@authors</code> . .<br>. . . 2195, 2196, 2199<br><code>\mktitle@bx</code> 2071, 2280,<br>2281, 2284, 2288,<br>2289, 2296, 2298,<br>2300, 2302, 2304,<br>2306, 2308, 2310,<br>2312, 2326, 2328,<br>2420, 2442, 2470,<br>2633, 2698, 2699, 2778<br><code>\month</code> . . . . . 1603, 2924<br><code>\moveleft</code> . . . . . 980<br><code>\multiply</code> . . . . . 3087                                                                                                                   | <code>\NAT@swafalse</code> . . . . . 631<br><code>\NAT@up</code> . . . . . 328<br><code>\NAT@yrsep</code> . . . . . 339<br><code>\NeedsTeXFormat</code> . . . . . 1<br><code>\newblock</code> . . . . . 633<br><code>\newbox</code> . . . . .<br>2071, 2226, 2477, 2637<br><code>\newcommand</code> . 356, 362,<br>417, 431, 434, 437,<br>639, 870, 1434,<br>1521, 1556, 1586,<br>1623, 1628, 1694,<br>1749, 1844, 2057,<br>2493, 2502, 2919,<br>3222, 3454, 3463, 3479<br><code>\newcount</code> . 1465, 1467, 2862<br><code>\newcounter</code> 1748, 2915, 2917<br><code>\newdimen</code> . . 961, 1001,<br>2638, 3059, 3061, 3063<br><code>\newenvironment</code> . 440,<br>946, 957, 1730, 2048<br><code>\newfloat</code> . . . . . 940<br><code>\newif</code> 162, 163, 164, 165,<br>166, 168, 827, 866,<br>868, 1049, 1469,<br>1616, 1779, 1781,<br>1783, 2579, 2581, 2583<br><code>\newlength</code> . . . . .<br>1618, 1620, 1621, 2861<br><code>\newsavebox</code> . . . . . 2860<br><code>\newskip</code> . . . . . 1023, 2639<br><code>\newtheorem</code> . . . . .<br>3349, 3352, 3355,<br>3358, 3361, 3365, 3368<br><code>\newtheoremstyle</code> . . .<br>. . . . . 3301, 3333<br><code>\newwrite</code> . . . . . 546<br><code>\next</code> . . . . 3180, 3182, 3192<br><code>\nobreak</code> . . . . . 505, 2814<br><code>\noindent</code> . . . . . 555,<br>1559, 1710, 2096,<br>2183, 2189, 2249,<br>2251, 2253, 2255,<br>2286, 2293, 2314,<br>2420, 2427, 2430,<br>2433, 2457, 2471,<br>2472, 2474, 2572,<br>2633, 2634, 2698,<br>2744, 2778, 2779,<br>2814, 2815, 2848, 3384<br><code>\noindentparagraph</code> .<br>. . . . . 2261, 3222<br><code>\nolinkurl</code> . . . . 2679,<br>2682, 2725, 2727, 2763 |
| <b>M</b><br><code>\makeatletter</code> . . . . . 539<br><code>\makebox</code> . . 2119, 3044,<br>3049, 3090, 3163, 3168<br><code>\MakeFramed</code> . . . . . 1733<br><code>\makelabel</code> . . . . . 1044<br><code>\MakeTextUppercase</code> .<br>2608, 2610, 3235,<br>3244, 3247, 3250,<br>3253, 3263, 3267, 3270<br><code>\maketitle</code> . . . . . 19, 2072<br><code>\MakeUppercase</code> . . . . 3189<br><code>\marginfigure</code> . . . . . 946<br><code>marginfigure (env.)</code> . . . 33<br><code>\marginpar</code> . . . . . 557,<br>945, 951, 960, 2314<br><code>\marginparsep</code> . . 962, 3036<br><code>\marginparwidth</code> . 962, 3036<br><code>\margintable</code> . . . . . 957<br><code>margintable (env.)</code> . . . . 33 | <b>N</b><br><code>\NAT@setcites</code> . . . . 346<br><code>\NAT@aysep</code> . . . . . 337<br><code>\NAT@citetp</code> . . . . . 632<br><code>\NAT@close</code> . . . . .<br>286, 288, 290, 292, 335<br><code>\NAT@cmprs</code> . . 314, 316, 318<br><code>\NAT@cmt</code> . . . . . 341<br><code>\NAT@ctype</code> . . . . . 632<br><code>\NAT@find@eq</code> . . . . . 329<br><code>\NAT@fullfalse</code> . . . . 632<br><code>\NAT@longnametrue</code> . 326<br><code>\NAT@merge</code> . . 320, 322, 324<br><code>\NAT@nmfmt</code> . . . . . 328<br><code>\NAT@numbersfalse</code> . . 300<br><code>\NAT@numberstrue</code> 302, 304<br><code>\NAT@open</code> . . . . . 286,<br>288, 290, 292, 333, 632<br><code>\NAT@partrue</code> . . . . . 632<br><code>\NAT@rem@eq</code> . . . . . 331<br><code>\NAT@esep</code> 294, 296, 298, 343<br><code>\NAT@sort</code> . . . . 310, 312, 318<br><code>\NAT@superfalse</code> . . . 302<br><code>\NAT@supertrue</code> . . . . 304 |                                                                                                                                                                                                                                                                                                                                                                                                                                                                                                                                                                                                                                                                                                                                                                                                                                                                                                                                                                                                                                                                                                                                                                                                                                                                                                                                                                                                                                                                                                                                                                                                                                                                                                                                  |

|                                      |                        |                   |                                           |
|--------------------------------------|------------------------|-------------------|-------------------------------------------|
| <code>\normalbaselines</code> . . .  | 2642                   | 1218, 1222, 1228, | 2891, 2893, 2895,                         |
| <code>\normalcolor</code> . . . . .  | 786                    | 1234, 1238, 1242, | 2897, 2899, 2901,                         |
| <code>\normalfont</code> . . . . .   | 580,                   | 1247, 1251, 1255, | 2903, 2905, 2957,                         |
|                                      | 1710, 2090, 2539,      | 1259, 1263, 1267, | 2966, 2976, 3068,                         |
|                                      | 2544, 2553, 2554,      | 1271, 1275, 1279, | 3073, 3112, 3122,                         |
|                                      | 2556, 2557, 2569,      | 1283, 1287, 1291, | 3132, 3242, 3243,                         |
|                                      | 2865, 3295, 3312,      | 1295, 1299, 1303, | 3246, 3249, 3252,                         |
|                                      | 3324, 3327, 3392, 3516 | 1307, 1311, 1315, | 3255, 3261, 3265,                         |
| <code>\normalparindent</code> . . .  | 771                    | 1319, 1323, 1327, | 3269, 3272, 3286,                         |
| <code>\normalsize</code> . . . . .   |                        | 1331, 1335, 1339, | 3287, 3288, 3289,                         |
|                                      | 2382, 2539, 2553,      | 1343, 1347, 1352, | 3290, 3291, 3296,                         |
|                                      | 2554, 2557, 2866, 3516 | 1357, 1361, 1365, | 3297, 3298, 3299,                         |
| <code>\num@authorgroups</code> . .   |                        | 1370, 1374, 1378, | 3318, 3319, 3320,                         |
|                                      | 1465,                  | 1382, 1386, 1390, | 3321, 3322, 3323,                         |
|                                      | 1476, 2076, 2655,      | 1394, 1398, 1402, | 3328, 3329, 3330,                         |
|                                      | 2659, 2661, 2708, 2749 | 1406, 1410, 1414, | 3331, 3377, 3378,                         |
| <code>\num@authors</code> . . . . .  |                        | 1604, 1605, 1606, | 3379, 3380, 3381,                         |
|                                      | 1467, 1474, 1488,      | 1717, 1719, 1721, | 3382, 3385, 3386,                         |
|                                      | 1495, 1549, 1552, 2747 | 1723, 1850, 1852, | 3387, 3388, 3404,                         |
| <code>\number</code> . . . . .       | 464                    | 1855, 1857, 1858, | 3405, 3406, 3408,                         |
| <code>\numberline</code> . . . . .   | 484, 497               | 1860, 1862, 1864, | 3410, 3412, 3414,                         |
| <code>\numexpr</code> . . . . .      | 2914, 2916, 2918       | 1867, 1870, 1873, | 3416, 3417, 3419,                         |
| <code>\nxandlist</code> . . . . .    | 2196                   | 1875, 1878, 1881, | 3426, 3428, 3430,                         |
|                                      |                        | 1884, 1906, 1917, | 3432, 3434, 3436,                         |
|                                      |                        | 1928, 1936, 1942, | 3438, 3440, 3442, 3444                    |
|                                      |                        | 1948, 1962, 1974, |                                           |
| <code>\onehalfspacing</code> . . . . | 270                    | 1981, 1995, 2002, | <code>\orcid</code> . . . . . 10, 1546    |
| <code>\openout</code> . . . . .      | 547                    | 2008, 2015, 2020, | <code>\outer@nobreak</code> . . . . 977   |
| <code>\or</code> . . . . .           | 204, 206, 208,         | 2026, 2250, 2252, |                                           |
|                                      | 210, 212, 214, 216,    | 2254, 2256, 2258, | <b>P</b>                                  |
|                                      | 218, 221, 224, 238,    | 2260, 2262, 2264, | <code>\pe</code> . . . . . 550, 755, 762, |
|                                      | 240, 242, 244, 246,    | 2266, 2268, 2297, | 772, 773, 779, 780,                       |
|                                      | 248, 250, 252, 254,    | 2299, 2301, 2303, | 2427, 3042, 3161,                         |
|                                      | 256, 595, 596, 597,    | 2305, 2307, 2309, | 3207, 3211, 3215,                         |
|                                      | 598, 599, 600, 602,    | 2311, 2325, 2327, | 3216, 3219, 3220,                         |
|                                      | 603, 605, 606, 682,    | 2335, 2337, 2339, | 3223, 3224, 3228,                         |
|                                      | 689, 696, 703, 710,    | 2341, 2343, 2345, | 3229, 3392, 3494, 3497                    |
|                                      | 717, 724, 731, 740,    | 2347, 2349, 2351, | <code>\PackageError</code> 56, 64, 72,    |
|                                      | 747, 759, 760, 761,    | 2353, 2361, 2363, | 81, 89, 101, 105,                         |
|                                      | 763, 764, 765, 766,    | 2365, 2367, 2369, | 109, 117, 125, 133, 143                   |
|                                      | 767, 768, 769, 797,    | 2371, 2373, 2375, | <code>\PackageInfo</code> . . . . . 53,   |
|                                      | 798, 799, 801, 803,    | 2377, 2379, 2386, | 55, 61, 63, 69,                           |
|                                      | 805, 807, 809, 810,    | 2388, 2390, 2392, | 71, 77, 80, 86, 88,                       |
|                                      | 812, 917, 918, 919,    | 2394, 2396, 2398, | 94, 100, 114, 116,                        |
|                                      | 920, 921, 923, 926,    | 2400, 2402, 2404, | 122, 124, 130, 132,                       |
|                                      | 931, 936, 937, 986,    | 2515, 2517, 2519, | 138, 142, 1167,                           |
|                                      | 987, 988, 989, 990,    | 2521, 2523, 2525, | 1211, 1217, 1227, 1233                    |
|                                      | 991, 996, 997, 998,    | 2527, 2529, 2531, | <code>\PageIndex</code> . . . . . 15      |
|                                      | 999, 1128, 1132,       | 2533, 2542, 2545, | <code>\pageref</code> . . . . . 2926      |
|                                      | 1136, 1140, 1144,      | 2546, 2549, 2552, | <code>\pagestyle</code> . . . . . 3057    |
|                                      | 1148, 1153, 1157,      | 2555, 2558, 2561, | <code>\par</code> . . . . . 432,          |
|                                      | 1161, 1168, 1172,      | 2564, 2567, 2657, | 435, 449, 505, 541,                       |
|                                      | 1176, 1180, 1185,      | 2658, 2660, 2662, | 782, 975, 1559,                           |
|                                      | 1189, 1193, 1197,      | 2710, 2887, 2889, | 1710, 2099, 2106,                         |
|                                      | 1202, 1206, 1212,      |                   | 2125, 2130, 2132,                         |

|                                                                                                                                                                                                                                                                                                                                                                                             |                                                                                                                                                                                                                                                                                                                                                                                                                                                                                                                                                                                                                                                                                                                                                                                                                                                                 |                                                                                                                                                                                                                                                                                                                                                                                                                                                                                                                                                                                                          |
|---------------------------------------------------------------------------------------------------------------------------------------------------------------------------------------------------------------------------------------------------------------------------------------------------------------------------------------------------------------------------------------------|-----------------------------------------------------------------------------------------------------------------------------------------------------------------------------------------------------------------------------------------------------------------------------------------------------------------------------------------------------------------------------------------------------------------------------------------------------------------------------------------------------------------------------------------------------------------------------------------------------------------------------------------------------------------------------------------------------------------------------------------------------------------------------------------------------------------------------------------------------------------|----------------------------------------------------------------------------------------------------------------------------------------------------------------------------------------------------------------------------------------------------------------------------------------------------------------------------------------------------------------------------------------------------------------------------------------------------------------------------------------------------------------------------------------------------------------------------------------------------------|
| 2183, 2189, 2232,<br>2236, 2239, 2249,<br>2251, 2253, 2255,<br>2296, 2298, 2300,<br>2312, 2328, 2427,<br>2433, 2440, 2457,<br>2468, 2471, 2474,<br>2476, 2499, 2501,<br>2503, 2504, 2572,<br>2576, 2633, 2635,<br>2642, 2644, 2672,<br>2674, 2681, 2690,<br>2699, 2701, 2719,<br>2721, 2727, 2735,<br>2743, 2745, 2776,<br>2777, 2778, 2780,<br>2794, 2814, 2837,<br>2841, 2845, 2848, 3390 | \ProvidesFile . . . . . 3<br>\ps@headings . . 2853, 2857<br>\ps@myheadings 2852, 2856<br>\ps@plain . . . . . 2851, 2855<br>\pushQED . . . . . 3391<br>\put . . . . . 2879, 2909                                                                                                                                                                                                                                                                                                                                                                                                                                                                                                                                                                                                                                                                                 | 2747, 2749, 2772,<br>2806, 2863, 2885,<br>2886, 2888, 2890,<br>2906, 2916, 2918,<br>2921, 2949, 3067,<br>3069, 3070, 3071,<br>3074, 3075, 3076,<br>3079, 3080, 3082,<br>3085, 3086, 3087,<br>3088, 3106, 3151,<br>3178, 3201, 3205,<br>3241, 3285, 3317,<br>3376, 3392, 3403,<br>3424, 3483, 3487, 3497                                                                                                                                                                                                                                                                                                  |
| \paragraph . . . . . 3218<br>\parbox . . . . . 662,<br>671, 2429, 2447,<br>2454, 2462, 2865, 3094                                                                                                                                                                                                                                                                                           | <b>Q</b><br>\qed . . . . . 3391<br>\quad . . . . . 526, 2968,<br>2971, 2978, 2982, 3152                                                                                                                                                                                                                                                                                                                                                                                                                                                                                                                                                                                                                                                                                                                                                                         |                                                                                                                                                                                                                                                                                                                                                                                                                                                                                                                                                                                                          |
| \parindent . . 755, 771,<br>1010, 2099, 2106,<br>2123, 2231, 3218,<br>3234, 3281, 3313, 3497                                                                                                                                                                                                                                                                                                | <b>R</b><br>\raggedright . . . . .<br>2429, 2470, 2743, 3498<br>\raisebox . . 2119, 2422,<br>2437, 2449, 2464,<br>3045, 3090, 3092, 3164                                                                                                                                                                                                                                                                                                                                                                                                                                                                                                                                                                                                                                                                                                                        | \removelastskip . . . . 541<br>\renewcommand 278, 282,<br>283, 286, 288, 290,<br>292, 294, 296, 298,<br>348, 371, 373, 376,<br>383, 385, 387, 389,<br>394, 396, 398, 402,<br>404, 406, 410, 412,<br>414, 864, 1041,<br>1471, 1540, 2050,<br>2083, 2759, 2938,<br>2939, 3042, 3102,<br>3103, 3161, 3206,<br>3210, 3214, 3218, 3227                                                                                                                                                                                                                                                                        |
| \parskip . . 755, 2123, 3497<br>\part . . . . . 3227<br>\PassOptionsToClass<br>. . . . . 158, 159<br>\pdfgentounicode . . . 824<br>\pdfglyptounicode .<br>. . . . . 817, 818,<br>819, 820, 821, 822, 823                                                                                                                                                                                    | \real@adddotafter . .<br>. . . . . 3187, 3190<br>\realSectionformat .<br>. . . 3183, 3195, 3196<br>\received . . . . . 18, 1694<br>\RecordChanges . . . . . 17<br>\ref . . . . . 2826, 2833<br>\refname . . . . . 279, 280<br>\refstepcounter . . . . 468<br>\relax . . . . . 170,<br>176, 182, 195, 202,<br>236, 329, 330, 418,<br>450, 469, 471, 475,<br>489, 503, 518, 528,<br>536, 547, 594, 679,<br>758, 794, 796, 916,<br>985, 1124, 1466,<br>1468, 1474, 1476,<br>1586, 1587, 1640,<br>1664, 1715, 1733,<br>1754, 1763, 1773,<br>1774, 1794, 1799,<br>1802, 1806, 1812,<br>1815, 1818, 1821,<br>1824, 1827, 1830,<br>1834, 1838, 1849,<br>1905, 2094, 2095,<br>2112, 2248, 2295,<br>2333, 2359, 2384,<br>2513, 2541, 2640,<br>2650, 2651, 2652,<br>2653, 2656, 2659,<br>2661, 2663, 2665,<br>2668, 2700, 2703,<br>2704, 2705, 2706,<br>2709, 2712, 2715, | \renewenvironment . .<br>942, 1042, 1644, 3390<br>\repeat . . 2290, 2871, 3084<br>\RequirePackage 29, 30,<br>31, 262, 263, 264,<br>265, 266, 267, 269,<br>272, 274, 277, 380,<br>581, 584, 648, 649,<br>659, 668, 677, 774,<br>825, 839, 845, 846,<br>850, 851, 854, 855,<br>856, 906, 1745,<br>2850, 3407, 3409,<br>3411, 3413, 3415,<br>3418, 3431, 3433,<br>3435, 3437, 3439, 3443<br>\reset@font . . . . 558, 571<br>\reversemarginpar . . 739<br>\rightarrow . . . . . 1751<br>\rightskip . . . . . 3232<br>\rlap . . . . . 3091<br>\rotatebox . . . . 3046, 3165<br>\rule . . . . . 565, 578, 3093 |
| \part . . . . . 3227<br>\PassOptionsToClass<br>. . . . . 158, 159<br>\pdfgentounicode . . . 824<br>\pdfglyptounicode .<br>. . . . . 817, 818,<br>819, 820, 821, 822, 823                                                                                                                                                                                                                    |                                                                                                                                                                                                                                                                                                                                                                                                                                                                                                                                                                                                                                                                                                                                                                                                                                                                 |                                                                                                                                                                                                                                                                                                                                                                                                                                                                                                                                                                                                          |
| \pdfstringdefDisableCommands<br>. . . . . 585<br>\phantomsection . . . .<br>. . . . 280, 2788, 3458<br>\popQED . . . . . 3397<br>\position . . . 11, 1530,<br>1534, 1535, 1536,<br>1537, 1538, 2485, 2754                                                                                                                                                                                   |                                                                                                                                                                                                                                                                                                                                                                                                                                                                                                                                                                                                                                                                                                                                                                                                                                                                 |                                                                                                                                                                                                                                                                                                                                                                                                                                                                                                                                                                                                          |
| \postcode . . . . .<br>. 11, 1537, 2485, 2753<br>printonly (env.) . . . . 23<br>\ProcessOptionsX . . . 160<br>\proof . . . . . 3390<br>\proofname . . . . . 3390<br>\protect . . . . . 484, 497<br>\protected@edef . . . .<br>. . . . . 469, 560, 574<br>\providecommand . . . .<br>. . . . . 633, 637, 3279<br>\ProvidesClass . . . . . 5                                                  |                                                                                                                                                                                                                                                                                                                                                                                                                                                                                                                                                                                                                                                                                                                                                                                                                                                                 |                                                                                                                                                                                                                                                                                                                                                                                                                                                                                                                                                                                                          |
|                                                                                                                                                                                                                                                                                                                                                                                             | <b>S</b><br>\savebox . . . . . 2865                                                                                                                                                                                                                                                                                                                                                                                                                                                                                                                                                                                                                                                                                                                                                                                                                             |                                                                                                                                                                                                                                                                                                                                                                                                                                                                                                                                                                                                          |

|                                                                                                                                                                   |                                                                                                                                                                                           |                                                                                                                                      |                                                                                                                                                                                                                                                               |                                                             |                                                           |
|-------------------------------------------------------------------------------------------------------------------------------------------------------------------|-------------------------------------------------------------------------------------------------------------------------------------------------------------------------------------------|--------------------------------------------------------------------------------------------------------------------------------------|---------------------------------------------------------------------------------------------------------------------------------------------------------------------------------------------------------------------------------------------------------------|-------------------------------------------------------------|-----------------------------------------------------------|
| <code>\screenonly (env.)</code> . . . . .                                                                                                                         | <u>23</u>                                                                                                                                                                                 | <code>\SetWatermarkColor</code> . . . . .                                                                                            |                                                                                                                                                                                                                                                               | <code>\subsection</code> . . . . .                          | <u>3214</u>                                               |
| <code>\scriptsize</code> <u>2233, 2868, 2872</u>                                                                                                                  |                                                                                                                                                                                           |                                                                                                                                      | <u>661, 670</u>                                                                                                                                                                                                                                               | <code>\subtitle</code> . . . . .                            | <u>10, 1463</u>                                           |
| <code>\scshape</code> . . . . .                                                                                                                                   | <u>3282, 3373</u>                                                                                                                                                                         | <code>\SetWatermarkFontSize</code> . . . . .                                                                                         |                                                                                                                                                                                                                                                               | <code>\subtitlenote</code> . .                              | <u>14, 1570</u>                                           |
| <code>\section</code> . . . . .                                                                                                                                   | <u>279,</u><br><u>2257, 2259, 2263,</u><br><u>2265, 2267, 2269,</u><br><u>2792, 2800, 3206, 3457</u>                                                                                      |                                                                                                                                      | <u>660, 669</u>                                                                                                                                                                                                                                               |                                                             |                                                           |
|                                                                                                                                                                   |                                                                                                                                                                                           | <code>\SetWatermarkText</code> <u>662, 671</u>                                                                                       |                                                                                                                                                                                                                                                               |                                                             |                                                           |
| <code>\section@raggedright</code> . . . . .                                                                                                                       | <u>3231,</u><br><u>3235, 3236, 3244,</u><br><u>3245, 3247, 3248,</u><br><u>3250, 3251, 3253,</u><br><u>3254, 3256, 3257,</u><br><u>3258, 3263, 3264,</u><br><u>3267, 3268, 3270, 3271</u> | <code>\sfdefault</code> . . . . .                                                                                                    | <u>864</u>                                                                                                                                                                                                                                                    |                                                             |                                                           |
|                                                                                                                                                                   |                                                                                                                                                                                           | <code>\sffamily</code> . . . . .                                                                                                     |                                                                                                                                                                                                                                                               |                                                             |                                                           |
| <code>\Sectionformat</code> . . . . .                                                                                                                             | <u>3179, 3183, 3185, 3196</u>                                                                                                                                                             |                                                                                                                                      | <u>2360, 2362, 2364,</u><br><u>2366, 2368, 2370,</u><br><u>2374, 2378, 2380,</u><br><u>2538, 2543, 2547,</u><br><u>2568, 2934, 3096,</u><br><u>3235, 3236, 3237,</u><br><u>3244, 3245, 3247,</u><br><u>3248, 3253, 3254,</u><br><u>3263, 3264, 3267, 3268</u> |                                                             |                                                           |
| <code>\SelectFootnoteRule</code> . . . . .                                                                                                                        | <u>775, 777</u>                                                                                                                                                                           | <code>\shortauthors</code> <u>19, 1500,</u><br><u>1501, 1508, 1509,</u><br><u>1511, 1514, 1515,</u><br><u>1517, 2208, 2210, 2933</u> |                                                                                                                                                                                                                                                               |                                                             |                                                           |
| <code>\selectlanguage</code> <u>1557, 2796</u>                                                                                                                    |                                                                                                                                                                                           | <code>\shortcite</code> . . . . .                                                                                                    | <u>636, 639</u>                                                                                                                                                                                                                                               |                                                             |                                                           |
| <code>\set@ACM@acmcpbox</code> . . . . .                                                                                                                          | <u>2221, 2226</u>                                                                                                                                                                         | <code>\shorttitle</code> <u>2953, 2961,</u><br><u>2971, 2982, 2989, 3013</u>                                                         |                                                                                                                                                                                                                                                               |                                                             |                                                           |
| <code>\setbox</code> . . . . .                                                                                                                                    | <u>514, 569,</u><br><u>980, 2230, 2284,</u><br><u>2420, 2442, 2470,</u><br><u>2481, 2633, 2643,</u><br><u>2698, 2778, 2790, 2798</u>                                                      | <code>\showeprint</code> . . . . .                                                                                                   | <u>3479</u>                                                                                                                                                                                                                                                   |                                                             |                                                           |
| <code>\setcctype</code> . . . . .                                                                                                                                 | <u>17, 1844</u>                                                                                                                                                                           | <code>\sidebar</code> . . . . .                                                                                                      | <u>940</u>                                                                                                                                                                                                                                                    |                                                             |                                                           |
| <code>\setcitestyle</code> . . . . .                                                                                                                              | <u>25, 283, 357, 363</u>                                                                                                                                                                  | <code>sidebar (env.)</code> . . . . .                                                                                                | <u>33</u>                                                                                                                                                                                                                                                     |                                                             |                                                           |
| <code>\setcopyright</code> . . . . .                                                                                                                              | <u>16, 1842</u>                                                                                                                                                                           | <code>\skip</code> . . . . .                                                                                                         | <u>785</u>                                                                                                                                                                                                                                                    |                                                             |                                                           |
| <code>\setcounter</code> <u>2089, 2176,</u><br><u>2278, 2916, 2918,</u><br><u>3239, 3262, 3266, 3277</u>                                                          |                                                                                                                                                                                           | <code>\small</code> . . . . .                                                                                                        | <u>558, 945,</u><br><u>952, 960, 1710,</u><br><u>2249, 2251, 2253,</u><br><u>2255, 2544, 2569,</u><br><u>2790, 2798, 2814, 3108</u>                                                                                                                           |                                                             |                                                           |
| <code>\setengagemetadata</code> . . . . .                                                                                                                         | <u>19, 2068</u>                                                                                                                                                                           | <code>\smallskipamount</code> . . . . .                                                                                              | <u>1024</u>                                                                                                                                                                                                                                                   |                                                             |                                                           |
| <code>\setkeys</code> . . . . .                                                                                                                                   | <u>38, 174, 180,</u><br><u>1427, 1681, 1729,</u><br><u>1842, 2618, 2619,</u><br><u>2624, 2625, 2686,</u><br><u>2687, 2691, 2692,</u><br><u>2731, 2732, 2736, 2737</u>                     | <code>\space</code> . . . . .                                                                                                        | <u>493, 1473,</u><br><u>1542, 1669, 2204,</u><br><u>2507, 3053, 3172,</u><br><u>3464, 3503, 3506, 3514</u>                                                                                                                                                    |                                                             |                                                           |
|                                                                                                                                                                   |                                                                                                                                                                                           | <code>\specialcomment</code> . . . . .                                                                                               | <u>3455</u>                                                                                                                                                                                                                                                   |                                                             |                                                           |
| <code>\setlength</code> <u>755, 756, 762,</u><br><u>771, 1003, 1004,</u><br><u>1009, 1015, 1018,</u><br><u>1019, 1020, 1021,</u><br><u>1619, 1622, 2231, 2867</u> |                                                                                                                                                                                           | <code>\standardpagestyle</code> . . . . .                                                                                            | <u>2935</u>                                                                                                                                                                                                                                                   |                                                             |                                                           |
| <code>\setmonofont</code> . . . . .                                                                                                                               | <u>847, 852</u>                                                                                                                                                                           | <code>\startPage</code> . . . . .                                                                                                    | <u>16, 1633</u>                                                                                                                                                                                                                                               |                                                             |                                                           |
| <code>\settopmatter</code> . . . . .                                                                                                                              | <u>18, 98, 1669,</u><br><u>1681, 1682, 1684,</u><br><u>1687, 1689, 1692, 2822</u>                                                                                                         | <code>\state</code> . . . . .                                                                                                        | <u>11, 1536, 2485, 2758</u>                                                                                                                                                                                                                                   |                                                             |                                                           |
|                                                                                                                                                                   |                                                                                                                                                                                           | <code>\stepcounter</code> <u>1565, 1567,</u><br><u>1574, 1577, 1584, 1753</u>                                                        |                                                                                                                                                                                                                                                               |                                                             |                                                           |
| <code>\setTrue</code> . . . . .                                                                                                                                   | <u>540</u>                                                                                                                                                                                | <code>\StrDel</code> . . . . .                                                                                                       | <u>2494</u>                                                                                                                                                                                                                                                   |                                                             |                                                           |
|                                                                                                                                                                   |                                                                                                                                                                                           | <code>\streetaddress</code> . . . . .                                                                                                | <u>11, 1534, 2485, 2752</u>                                                                                                                                                                                                                                   |                                                             |                                                           |
|                                                                                                                                                                   |                                                                                                                                                                                           | <code>\string</code> . . . . .                                                                                                       | <u>420, 421, 424, 426,</u><br><u>646, 1473, 1542,</u><br><u>1635, 1669, 2810,</u><br><u>2811, 3503, 3506, 3514</u>                                                                                                                                            |                                                             |                                                           |
|                                                                                                                                                                   |                                                                                                                                                                                           | <code>\strut</code> <u>2447, 2462, 3047, 3166</u>                                                                                    |                                                                                                                                                                                                                                                               |                                                             |                                                           |
|                                                                                                                                                                   |                                                                                                                                                                                           | <code>\strutbox</code> . . . . .                                                                                                     | <u>565, 578</u>                                                                                                                                                                                                                                               |                                                             |                                                           |
|                                                                                                                                                                   |                                                                                                                                                                                           | <code>\subsection</code> . . . . .                                                                                                   | <u>3210</u>                                                                                                                                                                                                                                                   |                                                             |                                                           |
|                                                                                                                                                                   |                                                                                                                                                                                           |                                                                                                                                      |                                                                                                                                                                                                                                                               | <code>\T</code>                                             |                                                           |
|                                                                                                                                                                   |                                                                                                                                                                                           |                                                                                                                                      |                                                                                                                                                                                                                                                               | <code>\teaserfigure</code> . . . . .                        | <u>2048</u>                                               |
|                                                                                                                                                                   |                                                                                                                                                                                           |                                                                                                                                      |                                                                                                                                                                                                                                                               | <code>teaserfigure (env.)</code> . . . . .                  | <u>18</u>                                                 |
|                                                                                                                                                                   |                                                                                                                                                                                           |                                                                                                                                      |                                                                                                                                                                                                                                                               | <code>\terms</code> . . . . .                               | <u>16, 1635</u>                                           |
|                                                                                                                                                                   |                                                                                                                                                                                           |                                                                                                                                      |                                                                                                                                                                                                                                                               | <code>\textbf</code> . . . . .                              | <u>1756, 1768, 2848</u>                                   |
|                                                                                                                                                                   |                                                                                                                                                                                           |                                                                                                                                      |                                                                                                                                                                                                                                                               | <code>\textbullet</code> . . . . .                          | <u>588, 1755,</u><br><u>2968, 2971, 2978, 2982</u>        |
|                                                                                                                                                                   |                                                                                                                                                                                           |                                                                                                                                      |                                                                                                                                                                                                                                                               | <code>\textcolor</code> . . . . .                           | <u>3096</u>                                               |
|                                                                                                                                                                   |                                                                                                                                                                                           |                                                                                                                                      |                                                                                                                                                                                                                                                               | <code>\textheight</code> . . . . .                          | <u>2230, 2282, 2284,</u><br><u>2290, 2871, 3045, 3164</u> |
|                                                                                                                                                                   |                                                                                                                                                                                           |                                                                                                                                      |                                                                                                                                                                                                                                                               | <code>\textit</code> . . . . .                              | <u>1769,</u><br><u>2824, 2828, 2829, 2830</u>             |
|                                                                                                                                                                   |                                                                                                                                                                                           |                                                                                                                                      |                                                                                                                                                                                                                                                               | <code>\textrightarrow</code> . . . . .                      | <u>589, 1751, 1765</u>                                    |
|                                                                                                                                                                   |                                                                                                                                                                                           |                                                                                                                                      |                                                                                                                                                                                                                                                               | <code>\textwidth</code> <u>962, 981, 982,</u><br><u>208</u> |                                                           |

|                              |                                |                              |
|------------------------------|--------------------------------|------------------------------|
| translatedabstract           | \upshape . . . . . 1041        | 335, 337, 339, 341, 343      |
| (env.) . . . . . 21          | \url . 1739, 1741, 1887, 3464  |                              |
| \translatedkeywords          | \UrlBreakPenalty . . .         | Y                            |
| . . . . . 21, 437            | . . . . . 2679, 2682           |                              |
| \translatedsubtitle          | \urlstyle . . . 592, 601, 604  | \year . . . . . 1601, 2924   |
| . . . . . 21, 434            | \usebox . . . . . 2879, 2909   |                              |
| \translatedtitle . 21, 431   | \usepackage . . . . .          | Z                            |
| \trivlist . . . . . 3393     | . . . 9, 10, 11, 12, 13, 14    |                              |
| \tw@ . . . . . 322           |                                | \z@ . . . . . 312, 316, 452, |
| \two@digits . . . 2924, 2925 | V                              | 472, 504, 514, 529,          |
| \twocolumn . 2302, 2304,     | \value . . . . . 1770          | 542, 565, 578, 756,          |
| 2306, 2308, 2310, 2326       | \vbox . . . . . 569,           | 793, 910, 914, 925,          |
|                              | 980, 2420, 2442,               | 1009, 1015, 1027,            |
| U                            | 2470, 2633, 2698, 2778         | 2099, 2106, 2119,            |
| \unskip . . . . 517, 587,    | \vfill 2234, 2236, 2239, 2241  | 2123, 2214, 2216,            |
| 783, 1533, 1539,             | \vskip 506, 541, 785, 793, 975 | 2231, 2422, 2437,            |
| 1546, 2482, 2485,            | \vspace . . . . . 2427, 3501   | 2449, 2464, 2743,            |
| 2486, 2488, 2490,            | \vsplit . . . . . 2284         | 2790, 2798, 2938,            |
| 2491, 2492, 2493,            | \vtop . . . . . 2230, 2643     | 2939, 3044, 3049,            |
| 2507, 2576, 2752,            |                                | 3060, 3062, 3064,            |
| 2753, 2754, 2756,            | W                              | 3090, 3092, 3102,            |
| 2757, 2758, 2759,            | \wd . . . . . 982, 2482        | 3103, 3163, 3168,            |
| 2760, 2761, 2763,            | \write . . . . . 646           | 3206, 3210, 3214,            |
| 2808, 2816, 2833, 2846       |                                | 3222, 3227, 3234,            |
| \unvbox . 570, 787, 792,     | X                              | 3293, 3325, 3494, 3497       |
| 2286, 2633, 2699, 2778       | \xdef . . . . . 333,           | \z@skip 541, 975, 1032, 3233 |
